# Supplementary material for: Collective enantioselective total synthesis of (+)-sinensilactam A, (+)-lingzhilactone B and (−)-lingzhiol: divergent reactivity of styrene
Source: Royal Society of Chemistry journal article supplement (doi:10.1039/d0cc04064a), 2020-01-01
Supplement: d0cc04064a1.pdf [file d0cc04064a1.pdf]

## SUPPORTING INFORMATION

### Collective Asymmetric Total Synthesis of (+)-Sinensilactam A, (+)-Lingzhilactone B and (-)-Lingzhiol: Divergent reactivity of styrene

Da-Wei Zhang <sup>a,b</sup>, Hui-Lan Fan <sup>a,b</sup>, Wen-Zhao Zhang <sup>c</sup>, Cheng-Ji Li <sup>a,b</sup>, San-Zhong Luo <sup>c,\*</sup>, Hong-Bo Qin <sup>a\*</sup>

*a State Key Laboratory of Photochemistry and Plant Resources in West China, Kunming Institute of Botany, Chinese Academy of Sciences; Yunnan Key laboratory of Natural Medicinal Chemistry, Kunming, 650201, Yunnan, P. R. China. Fax/ Tel: (+86)-871-65238010; E-mail: qinhongbo@mail.kib.ac.cn.*

*b University of Chinese Academy of Sciences, Beijing 100049, P. R. China.*

*c Centre of Basic Molecular Science, Department of Chemistry, Tsinghua University, Beijing 100084, China*

*d. Institute of Chemistry, Chinese Academy of Sciences, Beijing, 100190, China*

## Table of Contents

|                              |   |
|------------------------------|---|
| I. General Information ..... | 4 |
|------------------------------|---|

|                                                  |    |
|--------------------------------------------------|----|
| II. General Experimental Procedures .....        | 5  |
| Synthesis of Compound 1-2.....                   | 5  |
| Synthesis of Compound 2 .....                    | 9  |
| Synthesis of Compound 3 .....                    | 10 |
| Synthesis of Compound 4.....                     | 11 |
| Synthesis of Compound 5 .....                    | 12 |
| Synthesis of Compound 6 .....                    | 13 |
| Synthesis of Compound 8 .....                    | 14 |
| Synthesis of Compound 9 .....                    | 15 |
| Synthesis of Compound 10 .....                   | 16 |
| Synthesis of Compound 11 .....                   | 17 |
| Synthesis of Compound 12 .....                   | 18 |
| Synthesis of Compound Sinensilactam A(13) .....  | 19 |
| Synthesis of Compound Lingzhilactone B(14) ..... | 20 |
| Synthesis of Compound Lingzhilactone C(15) ..... | 21 |
| Synthesis of Compound 16 .....                   | 21 |
| Synthesis of Compound 17 .....                   | 23 |
| Synthesis of Compound 18 .....                   | 24 |
| Synthesis of Compound 19 .....                   | 25 |

|                                                                       |    |
|-----------------------------------------------------------------------|----|
| Synthesis of Compound 20 .....                                        | 26 |
| Synthesis of Compound 21 .....                                        | 27 |
| Synthesis of Compound 22 .....                                        | 28 |
| Synthesis of Compound Lingzhiol(23) .....                             | 29 |
| III Comparison of the Spectra of Natural and Synthetic Compounds..... | 30 |
| VI NMR Spectra for the Synthesized Compounds .....                    | 36 |
| V X-ray for the Synthesized Compounds .....                           | 62 |
| IV Chiral HPLC chromatograms of<br>Compound.....                      | 56 |

## I. General Information

All reactions were performed with dry solvents under anhydrous conditions, unless otherwise noted. Dry tetrahydrofuran (THF) was distilled over sodium. Dry dichloromethane (DCM) was distilled over calcium hydride. N, N-Dimethylformamide (DMF)

and methanol (MeOH) were dried with 4Å molecular sieve without distillation. Reagents were used as received without further purification, unless otherwise stated. Silica gel (200-300 mesh, Qingdao Marine Chemical Ltd., China), light petroleum ether (bp 60–90 °C) and ethyl acetate were used for product purification by flash column chromatography. Melting Point (MP) was determined with a X-4 Taike micro melting point apparatus and was uncorrected. Proton nuclear magnetic resonance (<sup>1</sup>H NMR) spectra were recorded on Bruker Avance 400 and 600 spectrometer at 400 MHz and 600 MHz. Carbon-13 nuclear magnetic resonance (<sup>13</sup>C NMR) was recorded on Bruker Avance 400 and 600 spectrometer at 100 and 150 MHz. IR spectra were recorded on a Bruker Tensor 27 FT-IR spectrometer. Mass spectra were recorded on a VG-Auto-Spec-3000 spectrometer. High-resolution mass spectral analysis (HRMS) data were recorded via electron impact mass spectrometry using a time of flight analyzer.

## II. General Experimental Procedures

### Synthesis of Compound 1

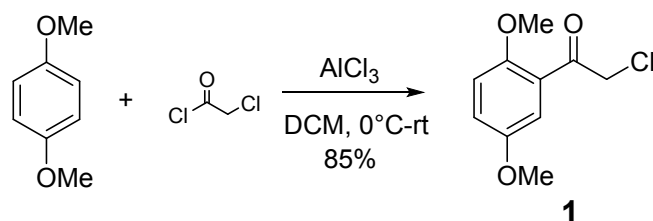

To a solution of 1,4-dimethoxybenzene (10.00 g, 72.46 mmol, 1.0 equiv.) and AlCl<sub>3</sub> (10.60 g, 79.71 mmol, 1.1 equiv.) in DCM (50 mL) at 0 °C were added chloroacetyl chloride (7.50 mL, 94.20 mmol, 1.3 equiv.) dropwise and stirred for 30 min at 0°C and then for 12 h at room temperature. The reaction was poured into a mixture of crushed ice and 21 mL Conc. HCl and stirred for 20 minutes again, the mixture was extracted with DCM (3 × 80 mL). The combined organic layers were washed with H<sub>2</sub>O (2 × 100 mL), brine (100 mL), dried over Na<sub>2</sub>SO<sub>4</sub> and concentrated under reduced pressure to afford crude product. It was crystallized from methanol to afford **1** (13.18 g, 85% yield) as white solid (mp: 84-86°C). R<sub>f</sub> = 0.3 (petroleum ether/EtOAc = 7/1); <sup>1</sup>H NMR (400

MHz, CDCl<sub>3</sub>):  $\delta$  7.40 (d,  $J$  = 3.2 Hz, 1H), 7.09 (dd,  $J$  = 9.0, 3.2 Hz, 1H), 6.93 (d,  $J$  = 9.0 Hz, 1H), 4.78 (s, 2H), 3.90 (s, 3H), 3.79 (s, 3H). <sup>13</sup>C NMR (100 MHz, CDCl<sub>3</sub>):  $\delta$  191.8, 153.7, 153.5, 124.9, 121.8, 114.2, 113.1, 56.1, 55.8, 51.1; IR (neat):  $\nu_{\max}$  (cm<sup>-1</sup>) = 3100, 2918, 1687, 1496, 1457, 1013, 816, 718, 630; HRMS (EIMS) calcd. for C<sub>10</sub>H<sub>11</sub>ClO<sub>3</sub> [M]<sup>+</sup>: 214.0397, found 214.0396;

## Synthesis of Compound 2

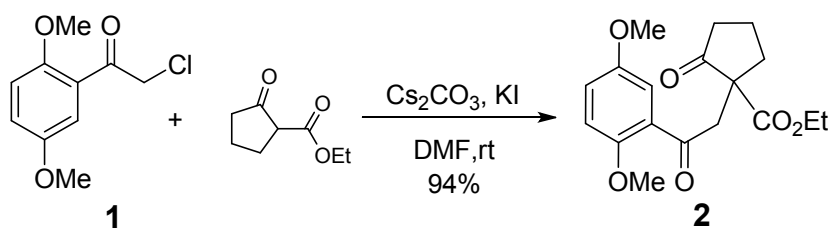

To a solution of **1** (6.00 g, 28.03 mmol, 1.0 equiv.) and ethyl 2-oxocyclopentane carboxylate (6.56 g, 42.05 mmol, 1.5 equiv.) in DMF (65 mL) were added Cs<sub>2</sub>CO<sub>3</sub> (12.79 g, 39.24 mmol, 1.4 equiv.) and KI (4.65 g, 28.03 mmol, 1.0 equiv.). The mixture was stirred at room temperature for 1 h. The reaction was quenched by addition of H<sub>2</sub>O (100 mL), and the mixture was extracted with ethyl acetate (3 × 80 mL). The combined organic layers were washed with H<sub>2</sub>O (2 × 100 mL), brine (100 mL), dried over Na<sub>2</sub>SO<sub>4</sub> and concentrated under reduced pressure to afford crude product. It was purified by flash chromatography (petroleum ether/EtOAc = 6/1) to afford **2** (8.80 g, 94% yield) as pale yellow oil.  $R_f$  = 0.3 (Petroleum ether/EtOAc = 4/1); <sup>1</sup>H NMR (400 MHz, CDCl<sub>3</sub>)  $\delta$  7.27 (d,  $J$  = 3.2 Hz, 1H), 7.03 (dd,  $J$  = 9.0, 3.2 Hz, 1H), 6.90 (d,  $J$  = 9.0 Hz, 1H), 4.16 (q,  $J$  = 7.1 Hz, 2H), 3.86 – 3.81 (m, 4H), 3.78 (s, 3H), 3.51 (d,  $J$  = 19.3 Hz, 1H), 2.68 – 2.44 (m, 3H), 2.09 (m, 3H), 1.23 (t,  $J$  = 7.1 Hz, 3H). <sup>13</sup>C NMR (100 MHz, CDCl<sub>3</sub>):  $\delta$  215.2, 197.7, 170.8, 153.6, 153.4, 127.0, 121.1, 113.5, 113.1, 61.4, 58.0, 56.0, 55.8, 48.7, 37.8, 33.4, 19.8, 14.0. IR (neat):  $\nu_{\max}$  (cm<sup>-1</sup>) = 2961, 2906, 2836, 1751, 1722, 1671, 1496, 1224, 865, 815. HRMS (EIMS) calcd. for C<sub>18</sub>H<sub>22</sub>O<sub>6</sub> [M]<sup>+</sup>: 334.1416, found 334.1424;

## Photoalkylation: synthesis of chiral-3

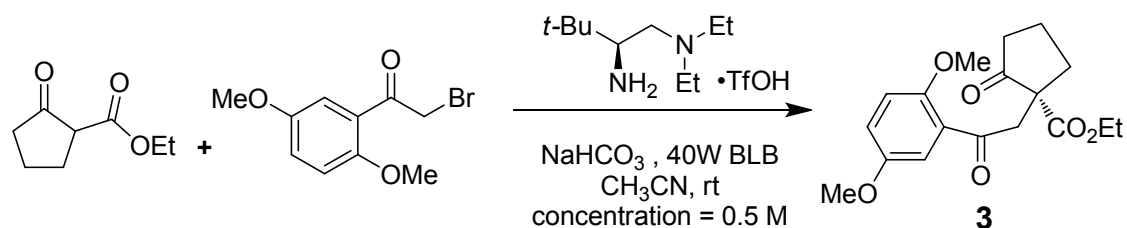

**Model reaction:** An oven-dried 25 mL schlenk tube was charged with primary- tertiary diamine (257 mg, 0.80 mmol, 0.2 equiv.), phenacyl bromide (1.02 g, 4.00 mmol, 1 equiv.) and  $\text{NaHCO}_3$  (336 mg, 4.00 mmol, 1 equiv.). The tube was purged with a stream of nitrogen, 8 mL of dry  $\text{CH}_3\text{CN}$  (with cyclic  $\beta$ -keto-ester, 16 mmol, 4 equiv.) was added via syringe. The resultant mixture was degassed three times. Then the tube was placed approximately 3 cm to 40W black light bulb (main wavelength: 365 nm) and stirred at room temperature. After the reaction was completed (TLC analysis, about 3 days). Solvent was removed and the residue was purified directly by silica gel column to give the target product (31% yield, 96% *ee*).

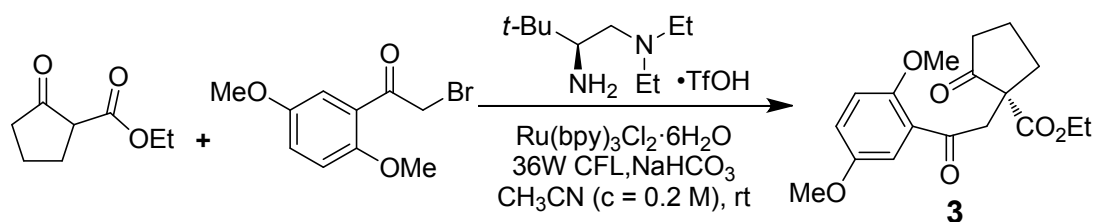

An oven-dried 10 mL schlenk tube was charged with primary-tertiary diamine (257 mg, 0.80 mmol, 0.2 equiv.), phenacyl bromide (1.02 g, 4.00 mmol, 1 equiv.),  $\text{Ru(bpy)}_3\text{Cl}_2 \cdot 6\text{H}_2\text{O}$  (171 mg, 0.20 mmol, 0.05 equiv.) and  $\text{NaHCO}_3$  (336 mg, 4.00 mmol, 1 equiv.) . The tube was purged with a stream of nitrogen, 2 mL of dry  $\text{CH}_3\text{CN}$  (with cyclic  $\beta$ -keto-ester, 1.6 mmol, 4 equiv.) was added via syringe. The resultant mixture was degassed three times. Then the tube was placed approximately 3 cm to 36W CFL and stirred at room temperature. After the reaction was complete (TLC analysis, about 2 days). Solvent was removed and the residue was purified directly by silica gel column to give the target products (71% yield, 99% *ee*). HPLC analysis: Daicel Chiralpak OJ-H, iso-propanol/hexane = 5/95, flow rate = 1.0 mL/min,  $\lambda$  = 254 nm, retention time = 37.62 min (major) and 40.27 min (minor).

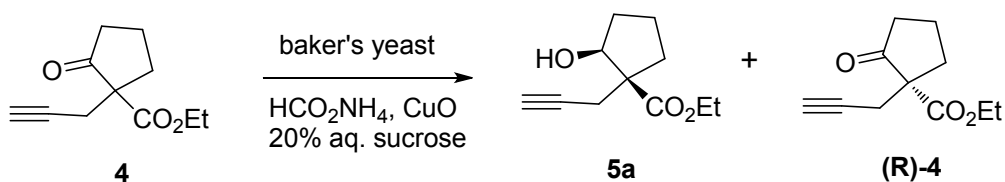

A round-bottomed 2000 mL flask with a magnetic stirring bar was charged with an aqueous solution of 20 % sucrose (260 g) in water (1300 mL) followed by Baker's yeast (56 g) and CuO (4.12 g , 51.49 mmol, 1 equiv.), HCOONH<sub>4</sub> (6.48 g, 102.98 mmol, 2 equiv.). To this resulting grayish solution was added  $\beta$ -keto-ester **4** (10.00 g, 51.49 mmol, 1 equiv.) dropwise. The reaction was vigorously stirred at 30 °C under air for 21 h. The suspension was then filtered through Celite pad. The solid (Baker's yeast, CuO and Celite) were then stirred vigorously with EtOAc for 30 minutes to recover product. The process was repeated until no more product in EtOAc by TLC. The aqueous layer was extracted with EtOAc four times. The combined organic layers were washed with brine, dried over Na<sub>2</sub>SO<sub>4</sub>, filtered and concentrated under reduced pressure to afford crude product. It was purified by flash column chromatography (Petroleum ether/EtOAc = 40/1) to afford **(R)-4** (4.3 g, 43% yield) as light yellow oil, together with **5a** (4.5 g, 45% yield) as light yellow oil

**5a**:  $R_f = 0.3$  (petroleum ether/EtOAc = 5/1);  $[\alpha]_D^{25} = -50.48$  ( $c = 0.4$ , CHCl<sub>3</sub>); <sup>1</sup>H NMR (400 MHz, CDCl<sub>3</sub>)  $\delta$  4.17 (q,  $J = 7.1$  Hz, 2H), 2.72 (t,  $J = 2.5$  Hz, 2H), 2.55 – 2.43 (m, 2H), 2.36 – 2.23 (m, 2H), 2.13 – 1.92 (m, 2H), 1.69 (s, 1H), 1.25 (t,  $J = 7.1$  Hz, 3H). <sup>13</sup>C NMR (100 MHz, CDCl<sub>3</sub>):  $\delta$  213.71, 170.35, 79.85, 70.70, 61.76, 58.74, 38.30, 32.55, 23.11, 19.74;

**(R)-4**:  $R_f = 0.2$  (Petroleum ether/EtOAc=3/1);  $[\alpha]_D^{25} = +24.41$  ( $c = 0.21$ , CHCl<sub>3</sub>); <sup>1</sup>H NMR (400 MHz, CDCl<sub>3</sub>)  $\delta$  4.28 – 4.15 (m, 2H), 3.00 (d,  $J = 5.2$  Hz, 1H), 2.56 – 2.41 (m, 2H), 2.25 (ddd,  $J = 13.2, 9.3, 7.0$  Hz, 1H), 2.07 – 1.95 (m, 2H), 1.93 – 1.61 (m, 4H), 1.30 (t,  $J = 7.1$  Hz, 3H). <sup>13</sup>C NMR (100 MHz, CDCl<sub>3</sub>):  $\delta$  174.9, 80.2, 78.3, 70.6, 61.1, 57.0, 32.5, 31.6, 25.3, 20.6, 14.2;

## Synthesis of Compound 6

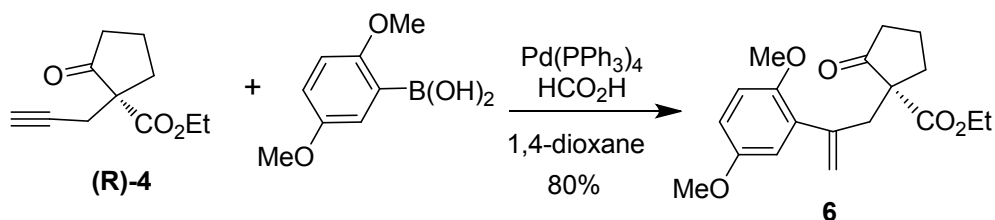

To a solution of **(R)-4** (3.44 g, 17.73 mmol, 1.0 equiv.) and aryl boronic acid (3.87 g, 21.28 mmol, 1.2 equiv.) in 1,4-dioxane (60 mL) were added Pd(PPh<sub>3</sub>)<sub>4</sub> (616 mg, 0.53 mmol, 0.03 equiv.) and HCOOH (0.417 mL), the mixture was stirred for 10 minutes at room temperature and for 2 h at 30 °C . The suspension was then filtered through Celite and the mixture was extracted with ethyl acetate (3 × 80 mL). The combined organic layers were washed with H<sub>2</sub>O (2 × 100 mL), brine (100 mL), dried over Na<sub>2</sub>SO<sub>4</sub> and concentrated at reduced pressure to afford crude product. It was purified by flash chromatography (petroleum ether/EtOAc = 15/1) to afford **6** (4.7 g, 80% yield) as pale yellow oil.  $R_f$  = 0.3 (petroleum ether/EtOAc = 5/1); 100 % *ee*.  $[\alpha]_D^{25}$  = -46.88 (c = 0.21, CHCl<sub>3</sub>); HPLC analysis: Daicel Chiralpak AD-H, *iso*- propanol/hexane = 5/95, flow rate = 1.0 mL/min,  $\lambda$  = 254 nm, retention time = 9.45 min (major) and 10.23 min (minor); <sup>1</sup>H NMR (400 MHz, CDCl<sub>3</sub>)  $\delta$  6.76 (d,  $J$  = 2.2 Hz, 2H), 6.65 (d,  $J$  = 1.8 Hz, 1H), 5.17 (s, 1H), 5.10 (d,  $J$  = 1.4 Hz, 1H), 3.95 (d,  $J$  = 7.2 Hz, 2H), 3.77 (d,  $J$  = 8.9 Hz, 6H), 3.30 (d,  $J$  = 14.2 Hz, 1H), 2.81 (d,  $J$  = 14.2 Hz, 1H), 2.40 (dd,  $J$  = 8.9, 4.2 Hz, 1H), 2.32 – 2.23 (m, 1H), 2.07 (dd,  $J$  = 15.5, 5.6 Hz, 1H), 1.85 (dd,  $J$  = 11.8, 7.2 Hz, 2H), 1.67 (s, 1H), 1.15 (t,  $J$  = 7.1 Hz, 3H). <sup>13</sup>C NMR (100 MHz, CDCl<sub>3</sub>):  $\delta$  214.1, 169.8, 153.3, 151.0, 144.4, 132.3, 119.1, 116.6, 113.0, 111.5, 61.3, 60.8, 56.0, 55.8, 40.1, 37.5, 31.8, 19.4, 14.0; IR (neat):  $\nu_{\max}$  (cm<sup>-1</sup>) = 2957, 2833, 1750, 1720, 1630, 1495, 1218, 1047, 809. HRMS (EIMS) calcd. for C<sub>19</sub>H<sub>24</sub>O<sub>5</sub> [M]<sup>+</sup>: 332.1624, found 332.1626;



## Synthesis of Compound 7

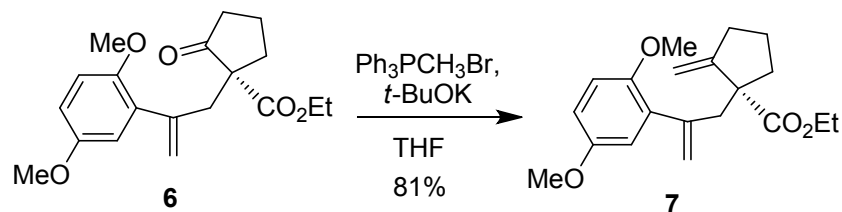

To a solution of methyltriphenylphosphonium bromide (25.21 g, 71.82 mmol, 6.0 equiv.) in THF (70 mL) at 0°C was added anhydrous *t*-BuOK (7.64 g, 68.22 mmol, 5.7 equiv.) under Ar and stirred for 30 min at 0°C and then for 1 h at room temperature. Then, the mixture was re-cooled to 0°C and a solution of **6** (4.00 g, 11.97 mmol, 1.0 equiv.) in THF (40 mL) was added dropwise, the resulted mixture was stirred for another 3 h. The reaction was quenched by addition of cold H<sub>2</sub>O (100 mL), and the mixture was extracted with ethyl acetate (3 × 80 mL), washed sequentially with H<sub>2</sub>O (2 × 100 mL), brine (100 mL), dried over Na<sub>2</sub>SO<sub>4</sub> and concentrated under reduced pressure to afford crude product. It was purified by flash chromatography (Petroleum ether/EtOAc = 30/1) to afford **7** (3.19 g, 81% yield) as colorless oil.  $R_f = 0.4$  (petroleum ether/EtOAc = 10/1);  $[\alpha]_D^{25} = +18.22$  (c = 0.11, CHCl<sub>3</sub>); <sup>1</sup>H NMR (400 MHz, CDCl<sub>3</sub>) δ 6.74 (d, *J* = 1.0 Hz, 2H), 6.65 (s, 1H), 5.14 (d, *J* = 16.1 Hz, 2H), 5.04 – 4.99 (m, 2H), 3.89 – 3.84 (m, 1H), 3.77 (d, *J* = 10.9 Hz, 6H), 3.70 – 3.64 (m, 1H), 3.32 (d, *J* = 14.2 Hz, 1H), 2.58 (d, *J* = 14.2 Hz, 1H), 2.34 – 2.25 (m, 3H), 1.68 – 1.58 (m, 3H), 1.11 (t, *J* = 7.1 Hz, 3H). <sup>13</sup>C NMR (100 MHz, CDCl<sub>3</sub>): δ 174.3, 155.3, 153.3, 150.9, 145.9, 133.1, 117.8, 116.4, 112.6, 111.4, 107.8, 60.3, 56.1, 56.0, 55.7, 45.0, 34.4, 33.4, 23.9, 13.8. IR (neat):  $\nu_{\text{max}}$  (cm<sup>-1</sup>) = 2978, 2953, 2832, 1723, 1645, 1495, 1219, 1047, 806. HRMS (EIMS) calcd. for C<sub>20</sub>H<sub>26</sub>O<sub>4</sub> [M]<sup>+</sup>: 330.1 831, found 330.1832;

## Synthesis of Compound 8

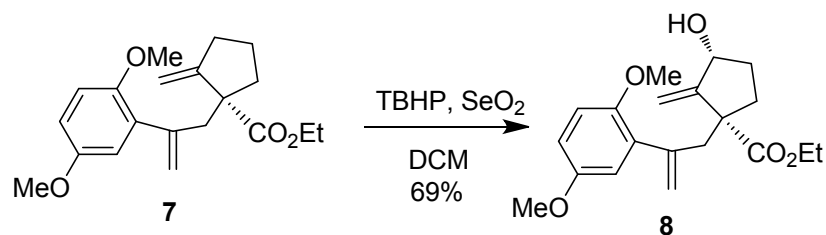

To a solution of SeO<sub>2</sub> (2.69 g, 24.24 mmol, 5.0 equiv.) in DCM (50 mL) at 0°C was added *t*-BuOOH (15.15 mL, 4 M in DCM, 60.60 mmol, 5.0 equiv.) and stirred for 30 min at 0°C, and a solution of **7** (4.00 g, 12.12 mmol, 1.0 equiv.) in DCM (35 mL) was added. After being warmed to room temperature, the mixture was stirred for 5 h. The reaction was quenched by addition of saturated aqueous Na<sub>2</sub>S<sub>2</sub>O<sub>3</sub> (100 mL), and the mixture was extracted with DCM (3 × 80 mL). The combined organic layers were washed with brine (100 mL), dried over Na<sub>2</sub>SO<sub>4</sub> and concentrated under reduced pressure to afford crude product. It was purified by flash chromatography (Petroleum ether/EtOAc = 3/1) to afford **8** (2.89 g, 69% yield) as colorless oil. R<sub>f</sub> = 0.3 (petroleum ether/EtOAc = 2/1); [α]<sub>D</sub><sup>25</sup> = -20.98 (c = 0.38, CHCl<sub>3</sub>); <sup>1</sup>H NMR (400 MHz, CDCl<sub>3</sub>) δ 6.74 (d, *J* = 1.5 Hz, 2H), 6.63 (s, 1H), 5.33 (dd, *J* = 42.4, 1.8 Hz, 2H), 5.12–5.05 (m, 2H), 4.38 (s, 1H), 3.90 (dq, *J* = 10.8, 7.1 Hz, 1H), 3.78 – 3.69 (m, 7H), 3.30 (d, *J* = 14.1 Hz, 1H), 2.63 (d, *J* = 14.1 Hz, 1H), 2.34 (ddd, *J* = 12.9, 6.6, 4.1 Hz, 1H), 2.02 – 1.95 (m, 1H), 1.68 – 1.59 (m, 2H), 1.50 (ddd, *J* = 13.1, 10.3, 6.5 Hz, 1H), 1.13 (t, *J* = 7.1 Hz, 3H). <sup>13</sup>C NMR (100 MHz, CDCl<sub>3</sub>): δ 174.1, 157.1, 153.3, 150.8, 145.3, 132.8, 118.3, 116.4, 112.7, 111.5, 75.2, 60.7, 56.0, 55.7, 54.5, 45.7, 34.0, 30.0, 13.8. IR (neat): ν<sub>max</sub> (cm<sup>-1</sup>) = 3436, 2940, 2833, 1723, 1580, 1496, 1218, 884, 807. HRMS (EIMS) calcd. for C<sub>20</sub>H<sub>26</sub>O<sub>5</sub> [M]<sup>+</sup>: 346.1780, found 346.1774;

## Synthesis of Compound **9**

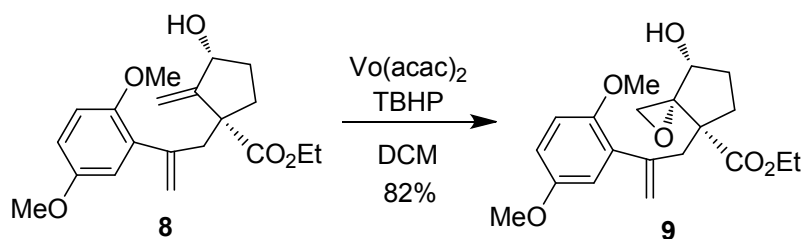

To a solution of **8** (3.40 g, 9.82 mmol, 1.0 equiv.) in DCM (45 mL) at 0°C were added VO(acac)<sub>2</sub> (779 mg, 2.94 mmol, 0.3 equiv.) and TBHP (7.36 mL, 4 M in hexane, 29.46

mmol, 3.0 equiv.) and stirred for 30 min at 0°C. After being warmed to room temperature, the mixture was stirred for 4 h. The reaction was quenched by addition of saturated aqueous Na<sub>2</sub>S<sub>2</sub>O<sub>3</sub> (80 mL) and the mixture was extracted with DCM (3 × 60 mL). The combined organic layers were washed sequentially with saturated aqueous Na<sub>2</sub>CO<sub>3</sub> (80 mL), brine (80 mL), dried over Na<sub>2</sub>SO<sub>4</sub> and concentrated under reduced pressure to afford crude product. It was purified by flash chromatography (Petroleum ether/EtOAc = 3/1) to afford **9** (2.91 g, 82% yield) as colorless oil. R<sub>f</sub> = 0.3 (Petroleum ether/EtOAc = 2/1); [α]<sub>D</sub><sup>25</sup> = -61.40 (c = 0.17, CHCl<sub>3</sub>); <sup>1</sup>H NMR (400 MHz, CDCl<sub>3</sub>) δ 6.74 (d, *J* = 1.3 Hz, 2H), 6.61 (s, 1H), 5.08 (d, *J* = 9.7 Hz, 2H), 4.14 – 4.04 (m, 1H), 3.93 – 3.85 (m, 1H), 3.77 – 3.69 (m, 7H), 3.21 (d, *J* = 14.2 Hz, 1H), 3.09 (d, *J* = 4.4 Hz, 1H), 2.77 (d, *J* = 4.4 Hz, 1H), 2.61 (d, *J* = 14.2 Hz, 1H), 2.49 – 2.41 (m, 1H), 2.14 – 2.04 (m, 1H), 1.91 (d, *J* = 9.7 Hz, 1H), 1.67 – 1.58 (m, 2H), 1.12 (t, *J* = 7.1 Hz, 3H). <sup>13</sup>C NMR (100 MHz, CDCl<sub>3</sub>): δ 171.1, 153.3, 150.7, 144.3, 132.4, 118.4, 116.4, 112.8, 111.6, 70.0, 68.2, 60.6, 56.0, 55.7, 51.8, 47.3, 42.0, 32.7, 27.3, 13.9. IR (neat): ν<sub>max</sub> (cm<sup>-1</sup>) = 3474, 2939, 2833, 1727, 1580, 1492, 1216, 1069, 884, 807. HRMS (EIMS) calcd. for C<sub>20</sub>H<sub>26</sub>O<sub>6</sub> [M]<sup>+</sup>: 362.1729, found 362.1730;

## Synthesis of Compound 10

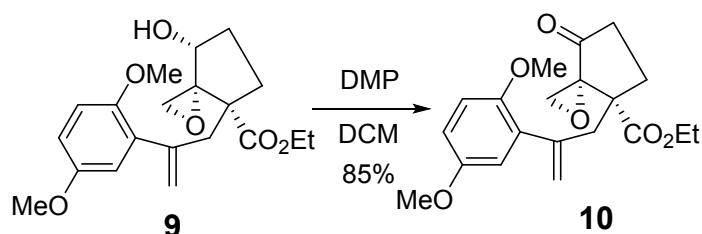

To a solution of **9** (2.10 g, 5.80 mmol, 1.0 equiv.) in DCM (45 mL) at 0°C was added Dess-Martin reagent (4.91 g, 11.60 mmol, 2.0 equiv.) under Ar and stirred for 30 min at 0°C. After being warmed to room temperature, the mixture was stirred for 4 h. The

reaction was quenched by addition of saturated aqueous  $\text{Na}_2\text{S}_2\text{O}_3$  (60 mL) and the mixture was extracted with DCM ( $3 \times 50$  mL). The combined organic layers were washed with brine (60 mL), and dried over  $\text{Na}_2\text{SO}_4$  and concentrated under reduced pressure to afford crude product. It was purified by flash chromatography (Petroleum ether/EtOAc = 6/1) to afford **10** (1.77 g, 85% yield) as colorless oil.  $R_f = 0.3$  (petroleum ether/EtOAc = 3/1);  $[\alpha]_D^{25} = +3.07$  ( $c = 0.38$ ,  $\text{CHCl}_3$ );  $^1\text{H NMR}$  (400 MHz,  $\text{CDCl}_3$ )  $\delta$  6.76 (s, 2H), 6.67 (s, 1H), 5.15 (d,  $J = 19.3$  Hz, 2H), 3.94 – 3.88 (m, 1H), 3.82 – 3.74 (m, 7H), 3.14 (dd,  $J = 14.3, 10.3$  Hz, 2H), 3.01 (d,  $J = 6.3$  Hz, 1H), 2.76 (d,  $J = 14.3$  Hz, 1H), 2.55 – 2.47 (m, 2H), 2.39 – 2.30 (m, 1H), 2.14 – 2.07 (m, 1H), 1.13 (t,  $J = 7.1$  Hz, 3H).  $^{13}\text{C NMR}$  (100 MHz,  $\text{CDCl}_3$ ):  $\delta$  212.4, 170.9, 153.4, 150.7, 143.6, 132.0, 119.0, 116.4, 113.0, 111.6, 64.1, 61.1, 56.0, 55.7, 50.0, 40.1, 34.4, 26.4, 13.9. IR (neat):  $\nu_{\text{max}}$  ( $\text{cm}^{-1}$ ) = 2938, 2833, 1752, 1727, 1580, 1492, 1217, 1045, 875, 805. HRMS (EIMS) calcd. for  $\text{C}_{20}\text{H}_{24}\text{O}_6$   $[\text{M}]^+$ : 360.1573, found 360.1582;

## Synthesis of Compound 12

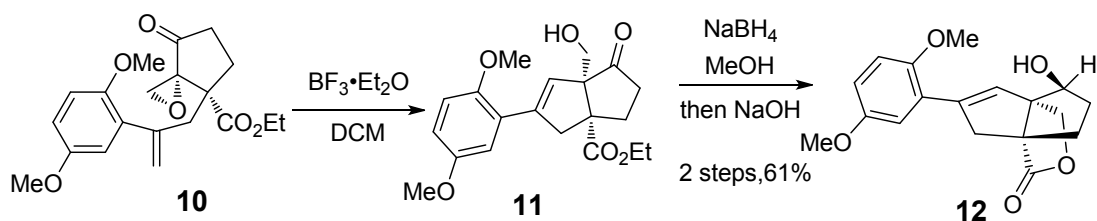

To a solution of **10** (2.60 g, 7.22 mmol, 1.0 equiv.) in DCM (27 mL) at  $0^\circ\text{C}$  was added  $\text{BF}_3 \cdot \text{Et}_2\text{O}$  (1.78 mL, 14.44 mmol, 2.0 equiv.) under Ar, the mixture was stirred at  $0^\circ\text{C}$  for 1 h. The reaction was quenched by addition of saturated aqueous  $\text{NaHCO}_3$  (60 mL), and the mixture was extracted with DCM ( $3 \times 50$  mL). The combined organic layers were washed with brine (60 mL), dried over  $\text{Na}_2\text{SO}_4$  and concentrated under reduced pressure to afford crude product which was used in next step without further purification.  $R_f = 0.4$  (Petroleum ether/EtOAc = 1/1);

To a solution of the crude **11** in MeOH (27 mL) at  $0^\circ\text{C}$  was added  $\text{NaBH}_4$  (301 mg, 7.94 mmol, 1.1 equiv.), the mixture was stirred at  $0^\circ\text{C}$  for 10 min. To a solution were added NaOH (346 mg, 8.66 mmol, 1.2 equiv.), the mixture was stirred at  $0^\circ\text{C}$  for 30 min. The

reaction was quenched by addition of saturated aqueous  $\text{NH}_4\text{Cl}$  (60 mL), and the mixture was extracted with ethyl acetate ( $3 \times 50\text{mL}$ ). The combined organic layers were washed with  $\text{H}_2\text{O}$  ( $2 \times 60\text{ mL}$ ), brine (60 mL), dried over  $\text{Na}_2\text{SO}_4$  and concentrated under reduced pressure to afford crude product. It was purified by flash chromatography (Petroleum ether/EtOAc = 3/2) to afford **12** (1.58 g, 61% yield) as colorless oil.  $R_f = 0.3$  (Petroleum ether/EtOAc = 1/2); 99.96% *ee*.  $[\alpha]_D^{25} = -9.82$  ( $c = 0.17$ ,  $\text{CHCl}_3$ ); HPLC analysis: Daicel Chiralpak AD-H, *iso*-propanol/hexane = 20/80, flow rate = 1.0 mL/min,  $\lambda = 254\text{ nm}$ , retention time = 26.89 min (major) and 13.98 (minor).  $^1\text{H NMR}$  (400 MHz,  $\text{CDCl}_3$ )  $\delta$  6.86 – 6.80 (m, 3H), 6.30 (s, 1H), 4.36 (d,  $J = 9.6\text{ Hz}$ , 1H), 4.21 (s, 1H), 4.07 (d,  $J = 9.6\text{ Hz}$ , 1H), 3.82 (s, 3H), 3.77 (s, 3H), 3.37 (dd,  $J = 17.1, 1.0\text{ Hz}$ , 1H), 2.98 (dd,  $J = 17.1, 1.4\text{ Hz}$ , 1H), 2.36 – 2.30 (m, 1H), 2.18 – 2.11 (m, 1H), 2.04 – 1.92 (m, 2H), 1.72 (s, 1H).  $^{13}\text{C NMR}$  (100 MHz,  $\text{CDCl}_3$ ):  $\delta$  182.6, 153.3, 152.1, 143.2, 126.6, 124.2, 115.0, 113.8, 112.0, 78.3, 76.0, 71.3, 58.8, 55.8, 47.1, 35.6, 35.5. IR (neat):  $\nu_{\text{max}}$  ( $\text{cm}^{-1}$ ) = 3445, 2938, 2833, 1747, 1580, 1497, 1216, 1145, 890. HRMS (EIMS) calcd. for  $\text{C}_{18}\text{H}_{20}\text{O}_5$   $[\text{M}]^+$ : 316.1311, found 316.1302;

### Synthesis of Compound 13

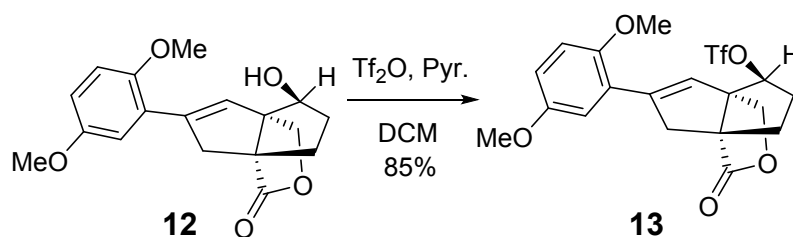

To a solution of **12** (272 mg, 0.860 mmol, 1.0 equiv.) in DCM (4 mL) at  $0^\circ\text{C}$  were added pyridine (345  $\mu\text{L}$ , 4.300 mmol, 5.0 equiv.) and  $\text{Tf}_2\text{O}$  (289  $\mu\text{L}$ , 1.720 mmol, 2.0 equiv.) under Ar, the mixture was stirred at  $0^\circ\text{C}$  for 15min. The reaction was quenched by addition of  $\text{H}_2\text{O}$  (20 mL) and the mixture was extracted with DCM ( $3 \times 15\text{ mL}$ ). The combined organic layers were washed with brine (20 mL), dried over  $\text{Na}_2\text{SO}_4$  and concentrated under reduced pressure to afford crude product. It was purified by flash chromatography (Petroleum ether/EtOAc = 6/1) to afford **13** (327 mg, 85% yield) as white solid (mp:  $129\text{-}131^\circ\text{C}$ ).  $R_f = 0.4$  (Petroleum ether/EtOAc = 4/1);  $[\alpha]_D^{25} = -46.58$

( $c = 0.23$ ,  $\text{CHCl}_3$ );  $^1\text{H NMR}$  (400 MHz,  $\text{CDCl}_3$ )  $\delta$  6.86 – 6.81 (m, 3H), 6.29 (s, 1H), 5.26 (s, 1H), 4.41 (d,  $J = 10.0$  Hz, 1H), 4.17 (d,  $J = 10.0$  Hz, 1H), 3.79 (d,  $J = 16.9$  Hz, 6H), 3.51 (dd,  $J = 17.3, 1.7$  Hz, 1H), 2.97 (dd,  $J = 17.3, 1.7$  Hz, 1H), 2.47 – 2.43 (m, 1H), 2.34 – 2.26 (m, 1H), 2.20 – 2.12 (m, 2H).  $^{13}\text{C NMR}$  (100 MHz,  $\text{CDCl}_3$ ):  $\delta$  180.8, 153.3, 152.2, 142.7, 125.6, 123.9, 115.0, 114.3, 112.2, 94.4, 75.5, 69.8, 59.0, 55.8, 55.7, 46.3, 34.7, 34.0. IR (neat):  $\nu_{\text{max}}$  ( $\text{cm}^{-1}$ ) = 2947, 2838, 1778, 1580, 1503, 1409, 1209, 1155, 882, 821. HRMS (EIMS) calcd. for  $\text{C}_{19}\text{H}_{19}\text{F}_3\text{O}_7\text{S}$   $[\text{M}]^+$ : 448.0804, found 448.0807;

### Synthesis of Compound 14

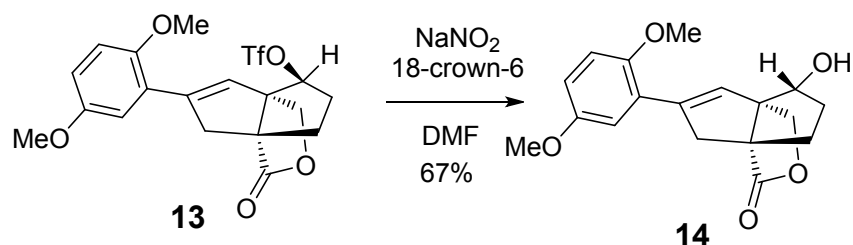

To a solution of **13** (327 mg, 0.729 mmol, 1.0 equiv.) in DMF (4 mL) at  $0^\circ\text{C}$  were added 18-crown-6 (192 mg, 0.729 mmol, 1.0 equiv.) and  $\text{NaNO}_2$  (309 mg, 3.645 mmol, 5.0 equiv.). After being warmed to room temperature, the mixture was stirred for 5 h. The reaction was quenched by addition of  $\text{H}_2\text{O}$  (20 mL) and the mixture was extracted with ethyl acetate ( $3 \times 15$  mL). The combined organic layers were washed with  $\text{H}_2\text{O}$  ( $2 \times 20$  mL), brine (20 mL), dried over  $\text{Na}_2\text{SO}_4$  and concentrated under reduced pressure to afford crude product. It was purified by flash chromatography (Petroleum ether/EtOAc = 3/2) to afford **14** (154 mg, 67% yield) as pale yellow oil.

$R_f = 0.4$  (petroleum ether/EtOAc = 2/3);  $[\alpha]_{\text{D}}^{25} = -81.48$  ( $c = 0.1$ ,  $\text{CHCl}_3$ );  $^1\text{H NMR}$  (400 MHz,  $\text{CDCl}_3$ )  $\delta$  6.82 – 6.78 (m, 3H), 6.44 (s, 1H), 4.87 (d,  $J = 9.5$  Hz, 1H), 4.24 (t,  $J = 6.0$  Hz, 1H), 4.13 (d,  $J = 9.5$  Hz, 1H), 3.79 (d,  $J = 18.8$  Hz, 6H), 3.38 (dd,  $J = 17.1, 1.7$  Hz, 1H), 2.94 (dd,  $J = 17.1, 1.4$  Hz, 1H), 2.45 – 2.39 (m, 1H), 2.11 – 2.03 (m, 2H), 1.88 – 1.73 (m, 2H).  $^{13}\text{C NMR}$  (100 MHz,  $\text{CDCl}_3$ ):  $\delta$  182.8, 153.3, 152.1, 139.4, 131.3, 124.5, 115.1, 113.4, 112.0, 78.6, 71.8, 68.7, 58.7, 55.8, 46.8, 35.3, 34.7. IR (neat):  $\nu_{\text{max}}$  ( $\text{cm}^{-1}$ ) = 3436, 2935, 2833, 1738, 1579, 1499, 1216, 1151, 878. HRMS (EIMS) calcd.

for C<sub>18</sub>H<sub>20</sub>O<sub>5</sub> [M]<sup>+</sup>: 316.1311, found 316.1319;

## Synthesis of Compound 15

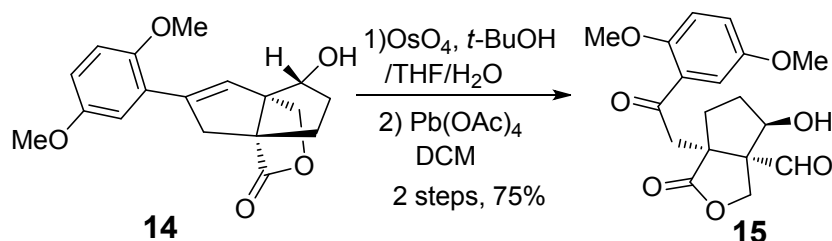

To a solution of **14** (154 mg, 0.487 mmol, 1.0 equiv.) in *t*-BuOH (2.5 mL) and THF (1 mL) at room temperature were added NMO (50% in H<sub>2</sub>O, 113 mg, 0.974 mmol, 2.0 equiv.) and OsO<sub>4</sub> (2% in H<sub>2</sub>O, 607 μL, 0.048 mmol, 0.1 equiv.), the mixture was stirred at room temperature for 13 h. The reaction was quenched by addition of saturated aqueous Na<sub>2</sub>S<sub>2</sub>O<sub>3</sub> (15 mL), and the mixture was extracted with ethyl acetate (3 × 10 mL). The combined organic layers were washed with brine (15 mL), dried over Na<sub>2</sub>SO<sub>4</sub> and concentrated under reduced pressure to afford crude product which was used in next step without further purification.

To a solution of the product made above in DCM (3.5 mL) at 0°C was added Pb(OAc)<sub>4</sub> (215 mg, 0.487 mmol, 1.0 equiv.) under Ar, the mixture was stirred at 0°C for 10 min. The reaction was quenched by addition of H<sub>2</sub>O (15 mL) and the mixture was extracted with DCM (3 × 10 mL). The combined organic layers were washed with brine (15 mL), dried over Na<sub>2</sub>SO<sub>4</sub> and concentrated under reduced pressure to afford crude product. It was purified by flash chromatography (Petroleum ether/EtOAc = 1/1) to afford **15** (127 mg, 75% yield) as colorless oil. R<sub>f</sub> = 0.4 (petroleum ether/EtOAc = 1/2); 99.2% *ee*. [α]<sub>D</sub><sup>25</sup> = +156.66 (c = 0.1, CHCl<sub>3</sub>); HPLC analysis: Daicel Chiralpak OJ-H, *iso*-propanol/hexane = 20/80, flow rate = 1.0 mL/min, λ = 254 nm, retention time = 42.16 min (major) and 29.15 min (minor). <sup>1</sup>H NMR (400 MHz, CDCl<sub>3</sub>) δ 9.61 (s, 1H), 7.29 (d, *J* = 3.2 Hz, 1H), 7.06 (dd, *J* = 9.0, 3.2 Hz, 1H), 6.89 (d, *J* = 9.1 Hz, 1H), 4.99 (s, 2H), 4.69 (dd, *J* = 10.1, 4.9 Hz, 1H), 3.88 (s, 3H), 3.75 (d, *J* = 13.3 Hz, 4H), 3.43 (d, *J* = 19.7 Hz, 1H), 2.16 – 2.12 (m, 2H), 2.06 – 2.00 (m, 1H), 1.84 – 1.76 (m, 1H), 1.70

– 1.59 (m, 2H).  $^{13}\text{C}$  NMR (100 MHz,  $\text{CDCl}_3$ ):  $\delta$  203.0, 199.0, 181.1, 154.3, 153.4, 125.3, 122.4, 113.3, 113.2, 66.8, 63.1, 56.0, 55.8, 55.0, 49.5, 34.6, 30.8. IR (neat):  $\nu_{\text{max}}$  ( $\text{cm}^{-1}$ ) = 3435, 2942, 2840, 1745, 1715, 1653, 1578, 1493, 1279, 1225, 1167, 1047, 883, 817. HRMS (EIMS) calcd. for  $\text{C}_{18}\text{H}_{20}\text{O}_7$   $[\text{M}]^+$ : 348.1209, found 348.1205;

## Synthesis of Compound 16

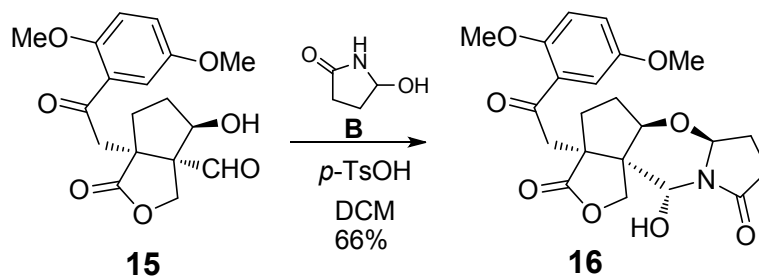

To a solution of **15** (124 mg, 0.356 mmol, 1.0 equiv.) and  $\gamma$ -lactam-hemiaminal **B** (180 mg, 1.780 mmol, 5.0 equiv.) in DCM (11 mL) was added *p*-TsOH (6 mg, 0.036 mmol, 0.1 equiv.), and the resultant mixture was stirred at 40°C for 5 h. The reaction was quenched by addition of saturated aqueous  $\text{NaHCO}_3$  (10 mL), and the mixture was extracted with DCM ( $3 \times 7$  mL). The combined organic layers were washed with brine (10 mL), dried over  $\text{Na}_2\text{SO}_4$  and concentrated under reduced pressure to afford crude product. It was purified by flash chromatography (Petroleum ether/EtOAc = 1/2) to afford **16** (101 mg, 66% yield) as white solid (mp: 236-238°C).  $R_f$  = 0.4 (petroleum ether/EtOAc = 1/2);  $[\alpha]_{\text{D}}^{25} = +18.72$  ( $c = 0.1$ , DMSO);  $^1\text{H}$  NMR (400 MHz,  $\text{DMSO-d}_6$ )  $\delta$  7.26 (d,  $J = 2.8$  Hz, 1H), 7.20 – 7.14 (m, 2H), 6.44 (d,  $J = 3.3$  Hz, 1H), 5.45 (d,  $J = 3.2$  Hz, 1H), 5.25 (dd,  $J = 6.2, 3.3$  Hz, 1H), 4.31 (dd,  $J = 12.0, 5.6$  Hz, 1H), 4.23 (d,  $J = 10.1$  Hz, 1H), 3.87 (s, 3H), 3.79 – 3.74 (m, 5H), 3.38 (d,  $J = 19.4$  Hz, 1H), 2.44 – 2.36 (m, 1H), 2.31 – 2.22 (m, 2H), 1.90 – 1.82 (m, 2H), 1.79 – 1.71 (m, 2H), 1.53 (dd,  $J = 11.7, 7.7$  Hz, 1H).  $^{13}\text{C}$  NMR (100 MHz,  $\text{DMSO-d}_6$ ):  $\delta$  198.1, 182.0, 173.0, 154.1, 153.3, 126.1, 121.2, 114.8, 114.1, 84.9, 77.5, 76.4, 69.5, 56.8, 56.0, 51.8, 49.2, 49.0, 34.4, 29.7, 25.4, 23.9. IR (neat):  $\nu_{\text{max}}$  ( $\text{cm}^{-1}$ ) = 3425, 2954, 1766, 1668, 1657, 1497, 1279, 1199, 1165, 1051, 885, 820. HRMS (EIMS) calcd. for  $\text{C}_{22}\text{H}_{25}\text{NO}_8$   $[\text{M}]^+$ : 431.1580, found 431.1587;



## Synthesis of Compound sinensilactam A

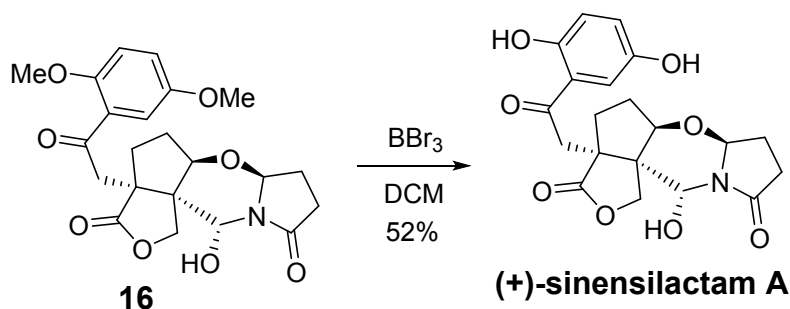

To a solution of **16** (28 mg, 0.064 mmol, 1.0 equiv.) in DCM (2 mL) at 0°C was added BBr<sub>3</sub> (1M in DCM, 384 μL, 0.384 mmol) under Ar, the mixture was stirred at 0°C for 5h. The reaction was quenched by addition of cold H<sub>2</sub>O (7 mL) and the mixture was extracted with ethyl acetate (3 × 5mL). The combined organic layers were washed with brine (7 mL), dried over Na<sub>2</sub>SO<sub>4</sub> and concentrated under reduced pressure to afford crude product. It was purified by flash chromatography (MeOH/CHCl<sub>3</sub> = 1/10) to afford **(+)-sinensilactam A** (13 mg, 52% yield) as pale yellow solid.  $R_f = 0.4$  (MeOH/CHCl<sub>3</sub> = 1/9);  $[\alpha]_D^{25} = +50.3$  (c = 0.07, MeOH); <sup>1</sup>H NMR (400 MHz, DMSO-d<sub>6</sub>) δ 10.81 (s, 1H), 9.21 (s, 1H), 7.22 (d,  $J = 2.9$  Hz, 1H), 6.98 (dd,  $J = 8.8, 2.9$  Hz, 1H), 6.83 (d,  $J = 8.8$  Hz, 1H), 5.45 (s, 1H), 5.25 (dd,  $J = 6.2, 3.4$  Hz, 1H), 4.32 (dd,  $J = 12.0, 5.6$  Hz, 1H), 4.24 (d,  $J = 10.1$  Hz, 1H), 3.85 (d,  $J = 19.2$  Hz, 1H), 3.77 (d,  $J = 10.1$  Hz, 1H), 3.41 (d,  $J = 19.1$  Hz, 1H), 2.39 (dd,  $J = 21.4, 11.2$  Hz, 1H), 2.32 – 2.23 (m, 2H), 1.93 – 1.80 (m, 2H), 1.73 (ddd,  $J = 12.0, 8.6, 4.4$  Hz, 1H), 1.62 – 1.47 (m, 1H). <sup>13</sup>C NMR (100 MHz, DMSO-d<sub>6</sub>): δ 201.6, 181.4, 172.5, 153.3, 149.5, 124.3, 120.0, 118.5, 114.6, 84.4, 77.0, 75.9, 69.2, 51.3, 48.2, 45.4, 33.9, 29.3, 25.0, 23.5. IR (neat):  $\nu_{\text{max}}$  (cm<sup>-1</sup>) = 3371, 3331, 2920, 1737, 1667, 1618, 1489, 1281, 1197, 1172, 1054, 881, 815. HRMS (EIMS) calcd. for C<sub>20</sub>H<sub>21</sub>NO<sub>8</sub> [M]<sup>+</sup>: 403.1267, found 403.1272;

## Synthesis of Compound lingzhilactone B

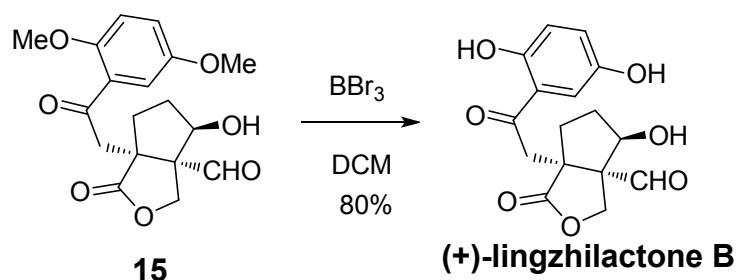

To a solution of **15** (30 mg, 0.086 mmol, 1.0 equiv.) in DCM (3 mL) at 0°C was added BBr<sub>3</sub> (1M in DCM, 430 μL, 0.430 mmol, 5.0 equiv.) under Ar, the mixture was stirred at 0°C for 5h. The reaction was quenched by addition of cold H<sub>2</sub>O (7 mL) and the mixture was extracted with ethyl acetate (3 × 5mL). The combined organic layers were washed with brine (7 mL), dried over Na<sub>2</sub>SO<sub>4</sub> and concentrated under reduced pressure to afford crude product. It was purified by flash chromatography (petroleum ether/EtOAc = 1/2) to afford **lingzshilactone B** (22 mg, 80% yield) as pale yellow solid.  $R_f = 0.4$  (petroleum ether/EtOAc = 1/2);  $[\alpha]_D^{25} = +154.75$  (c = 0.08, Acetone); <sup>1</sup>H NMR (400 MHz, acetone-d<sub>6</sub>) δ 10.99 (s, 1H), 9.68 (s, 1H), 8.22 (s, 1H), 7.33 (d,  $J = 2.9$  Hz, 1H), 7.13 (dd,  $J = 8.9, 2.9$  Hz, 1H), 6.81 (t,  $J = 8.2$  Hz, 1H), 4.96 – 4.88 (q, 2H), 4.75 (d,  $J = 4.8$  Hz, 1H), 4.66 (dd,  $J = 10.9, 5.4$  Hz, 1H), 3.78 (s, 2H), 2.06 (s, 1H), 2.01 (dd,  $J = 16.8, 11.3$  Hz, 2H), 1.65 – 1.56 (m, 1H). <sup>13</sup>C NMR (100 MHz, acetone-d<sub>6</sub>): δ 205.2, 203.2, 181.2, 156.4, 150.4, 126.8, 119.7, 119.4, 115.4, 77.9, 66.9, 63.7, 54.4, 44.5, 35.5, 32.0. IR (neat):  $\nu_{\text{max}}$  (cm<sup>-1</sup>) = 3375, 2922, 1741, 1640, 1621, 1485, 1390, 1277, 1170, 1026, 874, 808. HRMS (EIMS) calcd. for C<sub>16</sub>H<sub>16</sub>O<sub>7</sub> [M]<sup>+</sup>: 320.0896, found 320.0901;

## Synthesis of Compound lingzhilactone C

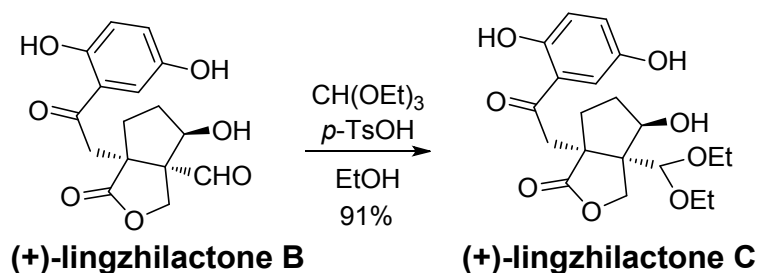

To a solution of **lingzhilactone B** (24 mg, 0.08 mmol, 1.0 equiv.) in EtOH (4 mL) at room temperature were added  $\text{CH}(\text{OEt})_3$  (31.26  $\mu\text{L}$ , 0.19 mmol, 2.5 equiv.) and *p*-TsOH (1.3 mg, 0.008 mmol, 0.1 equiv.) under Ar, the mixture was stirred at 35°C for 5 h. The reaction was quenched by addition of cold  $\text{H}_2\text{O}$  (7 mL) and the mixture was extracted with ethyl acetate ( $3 \times 5$  mL). The combined organic layers were washed with brine (7 mL), dried over  $\text{Na}_2\text{SO}_4$  and concentrated under reduced pressure to afford crude product. It was purified by flash chromatography (Petroleum ether/EtOAc = 1/2) to afford **lingzhilactone C** (26 mg, 91% yield) as yellow oil.  $R_f = 0.4$  (Petroleum ether/EtOAc = 1/1);  $[\alpha]_D^{20} = +114.27$  ( $c = 0.06$ , DMSO);  $^1\text{H NMR}$  (400 MHz,  $\text{CD}_3\text{OD}$ )  $\delta$  7.22 (d,  $J = 2.9$  Hz, 1H), 7.02 (dd,  $J = 8.9, 2.9$  Hz, 1H), 6.80 (d,  $J = 8.9$  Hz, 1H), 4.81 (d,  $J = 8.8$  Hz, 1H), 4.59 (dd,  $J = 10.7, 6.7$  Hz, 1H), 4.41 (s, 1H), 4.27 (d,  $J = 8.8$  Hz, 1H), 3.99 (d,  $J = 18.9$  Hz, 1H), 3.77 – 3.73 (m, 1H), 3.65 (dq,  $J = 14.1, 7.0$  Hz, 1H), 3.51 (dq,  $J = 9.2, 7.0$  Hz, 1H), 3.40 (d,  $J = 18.9$  Hz, 1H), 3.24 (dq,  $J = 14.1, 7.0$  Hz, 1H), 1.98 (ddd,  $J = 24.2, 12.4, 6.3$  Hz, 2H), 1.77 (td,  $J = 13.1, 6.0$  Hz, 1H), 1.35 (ddd,  $J = 12.9, 11.8, 6.3$  Hz, 1H), 1.14 (t,  $J = 7.0$  Hz, 3H), 1.01 (t,  $J = 7.0$  Hz, 3H).  $^{13}\text{C NMR}$  (100 MHz,  $\text{CD}_3\text{O D}$ ):  $\delta$  203.6, 184.1, 155.0, 149.4, 124.8, 118.9, 118.5, 113.8, 105.9, 74.4, 68.1, 67.1, 65.2, 56.7, 52.8, 43.7, 34.8, 30.6, 14.5, 13.9. IR (neat):  $\nu_{\text{max}}$  ( $\text{cm}^{-1}$ ) = 3439, 2976, 1756, 1635, 1616, 1482, 1376, 1279, 1165, 1053, 870, 807. HRMS (EIMS) calcd. for  $\text{C}_{20}\text{H}_{26}\text{O}_8$   $[\text{M}]^+$ : 394.1628, found 394.1627.

### Synthesis of Compound **20**

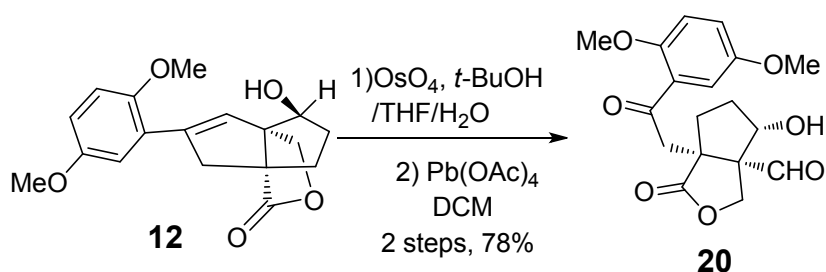

To a solution of **12** (120 mg, 0.379 mmol, 1.0 equiv.) in *t*-BuOH (2 mL) and THF (0.8 mL) at room temperature were added NMO (50% in  $\text{H}_2\text{O}$ , 88 mg, 0.758 mmol, 2.0 equiv.) and  $\text{OsO}_4$  (2% in  $\text{H}_2\text{O}$ , 460  $\mu\text{L}$ , 0.037 mmol, 0.1 equiv.), the mixture was stirred

at room temperature for 12 h. The reaction was quenched by addition of saturated aqueous  $\text{Na}_2\text{S}_2\text{O}_3$  (10 mL), and the mixture was extracted with ethyl acetate ( $3 \times 7$  mL). The combined organic layers were washed with brine (10 mL), and dried over  $\text{Na}_2\text{SO}_4$  and concentrated under reduced pressure to afford crude product which was used in next step without further purification.

To a solution of the product made above in DCM (2.4 mL) at  $0^\circ\text{C}$  was added  $\text{Pb}(\text{OAc})_4$  (167 mg, 0.379 mmol, 1.0 equiv.) under Ar, the mixture was stirred at  $0^\circ\text{C}$  for 10 min. The reaction was quenched by addition of  $\text{H}_2\text{O}$  (10 mL) and the mixture was extracted with DCM ( $3 \times 7$  mL). The combined organic layers were washed with brine (10 mL), and dried over  $\text{Na}_2\text{SO}_4$  and concentrated under reduced pressure to afford crude product. It was purified by flash chromatography (Petroleum ether/EtOAc = 1/1) to afford **20** (102 mg, 78% yield) as white solid (mp:  $60\text{-}62^\circ\text{C}$ ).  $R_f = 0.5$  (petroleum ether/EtOAc = 1/2); 99.9% *ee*.  $[\alpha]_{\text{D}}^{25} = +142.18$  ( $c = 0.31$ ,  $\text{CHCl}_3$ ); HPLC analysis: Daicel Chiralpak OJ-H, *iso*-propanol/hexane = 20/80, flow rate = 1.0 mL/min,  $\lambda = 254$  nm, retention time = 44.39 min (major) and 32.89 min (minor).  $^1\text{H}$  NMR (400 MHz,  $\text{CDCl}_3$ )  $\delta$  9.66 (s, 1H), 7.28 (t,  $J = 6.6$  Hz, 1H), 7.07 (dd,  $J = 9.0, 3.2$  Hz, 1H), 6.91 (d,  $J = 9.1$  Hz, 1H), 5.07 (d,  $J = 9.9$  Hz, 1H), 4.39 (s, 1H), 4.01 (d,  $J = 10.0$  Hz, 1H), 3.96 (d,  $J = 19.9$  Hz, 1H), 3.90 (s, 3H), 3.81 – 3.74 (m, 4H), 3.12 (d,  $J = 3.1$  Hz, 1H), 2.50 – 2.42 (m, 1H), 2.24 (dd,  $J = 13.0, 6.8$  Hz, 1H), 1.92 (dd,  $J = 13.7, 6.4$  Hz, 1H), 1.79 – 1.70 (m, 1H).  $^{13}\text{C}$  NMR (100 MHz,  $\text{CDCl}_3$ ):  $\delta$  203.2, 199.3, 181.1, 154.4, 153.4, 125.3, 122.5, 113.4, 113.2, 83.1, 71.2, 62.6, 56.0, 55.8, 54.4, 49.3, 37.3, 32.4. IR (neat):  $\nu_{\text{max}}$  ( $\text{cm}^{-1}$ ) = 3456, 2939, 2838, 1761, 1716, 1609, 1581, 1494, 1277, 1223, 1158, 1017, 820. HRMS (EIMS) calcd. for  $\text{C}_{18}\text{H}_{20}\text{O}_7$   $[\text{M}]^+$ : 348.1209, found 348.1218;

## Synthesis of Compound 21

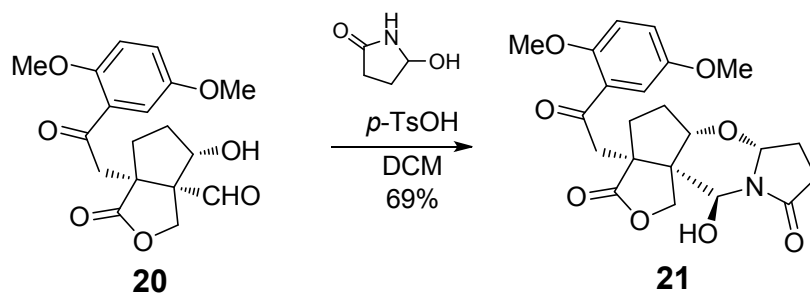

To a solution of **20** (60 mg, 0.172 mmol, 1.0 equiv.) and  $\gamma$ -lactam-hemiaminal (52 mg, 0.516 mmol, 3.0 equiv.) in DCM (1.5 mL) was added  $p$ - (6 mg, 0.034 mmol, 0.2 equiv.), and the resultant mixture was stirred at 28°C for 9 h. The reaction was quenched by addition of saturated aqueous NaHCO<sub>3</sub> (7 mL), and the mixture was extracted with DCM (3 × 5 mL). The combined organic layers were washed with brine (7 mL), dried over Na<sub>2</sub>SO<sub>4</sub> and concentrated under reduced pressure to afford crude product. It was purified by flash chromatography (Petroleum ether/EtOAc = 1/2) to afford **21** (51 mg, 69% yield) as white solid (mp: 220-222°C).  $R_f$  = 0.3 (petroleum ether/EtOAc = 1/2);  $[\alpha]_D^{25} = +94.32$  (c = 0.133, DMSO); <sup>1</sup>H NMR (600 MHz, CDCl<sub>3</sub>)  $\delta$  7.38 (d,  $J$  = 3.3 Hz, 1H), 7.05 (dd,  $J$  = 9.0, 3.3 Hz, 1H), 6.90 (d,  $J$  = 9.0 Hz, 1H), 5.36 (d,  $J$  = 4.1 Hz, 1H), 5.21 (dd,  $J$  = 6.6, 4.2 Hz, 1H), 4.72 (d,  $J$  = 10.8 Hz, 1H), 4.26 (d,  $J$  = 3.8 Hz, 2H), 3.84 (s, 3H), 3.81 – 3.78 (m, 4H), 3.71 (d,  $J$  = 19.9 Hz, 1H), 3.28 (d,  $J$  = 19.9 Hz, 1H), 2.37 (ddd,  $J$  = 7.6, 5.1, 2.7 Hz, 2H), 2.31 (ddd,  $J$  = 8.3, 6.1, 1.7 Hz, 1H), 2.22 (td,  $J$  = 13.2, 5.9 Hz, 1H), 2.07 (dd,  $J$  = 12.5, 6.4 Hz, 1H), 1.83 – 1.77 (m, 2H), 1.61 (ddd,  $J$  = 13.7, 6.8, 3.7 Hz, 1H). <sup>13</sup>C NMR (125 MHz, CDCl<sub>3</sub>):  $\delta$  199.7, 182.4, 172.3, 154.4, 153.4, 126.4, 121.8, 114.0, 113.7, 84.1, 80.4, 72.2, 71.5, 56.3, 56.0, 52.6, 52.3, 48.7, 38.7, 29.9, 29.2, 24.8. IR (neat):  $\nu_{\max}$  (cm<sup>-1</sup>) = 3296, 2954, 1757, 1685, 1654, 1492, 1300, 1190, 1176, 1030, 869, 816. HRMS (EIMS) calcd. for C<sub>22</sub>H<sub>25</sub>NO<sub>8</sub> [M]<sup>+</sup>: 431.1580, found 431.1576;

## Synthesis of Compound sinensilactam A isomer

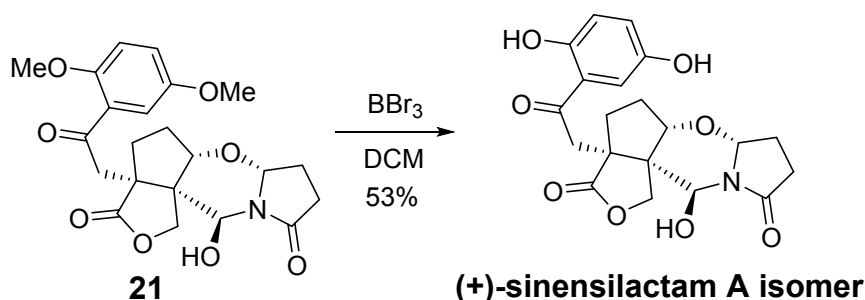

To a solution of **21** (32 mg, 0.074 mmol, 1.0 equiv.) in DCM (2.4 mL) at 0°C was added BBr<sub>3</sub> (1M in DCM, 444 μL, 0.444 mmol, 6.0 equiv.) under Ar, the mixture was stirred at 0°C for 5h. The reaction was quenched by addition of cold H<sub>2</sub>O (7 mL) and the mixture was extracted with ethyl acetate (3 × 5 mL). The combined organic layers were washed with brine (7 mL), dried over Na<sub>2</sub>SO<sub>4</sub> and concentrated under reduced pressure to afford crude product. It was purified by flash chromatography (MeOH/ CHCl<sub>3</sub> = 1/10) to afford **sinensilactam A isomer** (16 mg, 53% yield) as pale yellow solid.  $R_f = 0.4$  (MeOH/CHCl<sub>3</sub> = 1/9);  $[\alpha]_D^{25} = +45.04$  (c = 0.1, DMSO); <sup>1</sup>H NMR (400 MHz, DMSO-d<sub>6</sub>) δ 10.63 (s, 1H), 9.20 (s, 1H), 7.16 (d, *J* = 2.9 Hz, 1H), 6.99 (dd, *J* = 8.8, 2.9 Hz, 1H), 6.81 (d, *J* = 8.8 Hz, 1H), 6.61 (s, 1H), 5.29 (s, 1H), 5.27 – 5.24 (m, 1H), 4.53 (d, *J* = 10.5 Hz, 1H), 4.33 (s, 1H), 3.94 (d, *J* = 10.5 Hz, 1H), 3.74 (d, *J* = 19.9 Hz, 1H), 3.24 (d, *J* = 19.9 Hz, 1H), 2.38 – 2.16 (m, 4H), 1.87 (dd, *J* = 12.4, 6.2 Hz, 1H), 1.72 (ddd, *J* = 19.1, 13.1, 7.6 Hz, 2H), 1.56 – 1.48 (m, 1H). <sup>13</sup>C NMR (100 MHz, DMSO-d<sub>6</sub>): δ 202.8, 182.0, 171.4, 153.7, 149.8, 124.8, 120.8, 118.8, 115.2, 83.6, 80.1, 72.0, 70.6, 52.2, 51.9, 45.4, 38.8, 29.5, 29.0, 24.6. IR (neat):  $\nu_{\max}$  (cm<sup>-1</sup>) = 3415, 3194, 2917, 1730, 1668, 1622, 1486, 1282, 1179, 1170, 1059, 877, 800. HRMS (EIMS) calcd. for C<sub>20</sub>H<sub>21</sub>NO<sub>8</sub> [M]<sup>+</sup>: 403.1267, found 403.1269;

## Synthesis of (+)-*epi*-lingzhilactone **B**

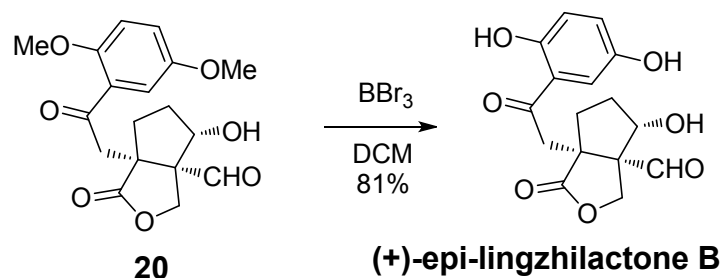

To a solution of **20** (29 mg, 0.083 mmol, 1.0 equiv.) in DCM (3 mL) at 0°C was added BBr<sub>3</sub> (1M in DCM, 415 μL, 0.415 mmol, 5.0 equiv.) under Ar, the mixture was stirred at 0°C for 5h. The reaction was quenched by addition of cold H<sub>2</sub>O (7 mL) and the mixture was extracted with ethyl acetate (3 × 5mL). The combined organic layers were washed with brine (7 mL), dried over Na<sub>2</sub>SO<sub>4</sub> and concentrated under reduced pressure to afford crude product. It was purified by flash chromatography (Petroleum ether/EtOAc = 1/2) to afford (+)-*epi*-lingzhilactone **B** (21 mg, 81% yield) as pale yellow solid.  $R_f = 0.4$  (petroleum ether/EtOAc = 1/2);  $[\alpha]_D^{25} = +85.27$  (c = 0.14, DMSO); <sup>1</sup>H NMR (400 MHz, acetone-d<sub>6</sub>) δ 10.99 (s, 1H), 9.74 (s, 1H), 8.21 (s, 1H), 7.43 (d,  $J = 2.9$  Hz, 1H), 7.13 (dd,  $J = 8.9, 2.9$  Hz, 1H), 6.82 (d,  $J = 8.9$  Hz, 1H), 4.94 (d,  $J = 9.7$  Hz, 1H), 4.57 (d,  $J = 3.9$  Hz, 1H), 4.51 (s, 1H), 4.15 (d,  $J = 19.4$  Hz, 1H), 4.10 (d,  $J = 9.7$  Hz, 1H), 4.00 (d,  $J = 19.4$  Hz, 1H), 2.60 (dd,  $J = 11.8, 7.5$  Hz, 2H), 2.18 (dd,  $J = 13.0, 6.9$  Hz, 1H), 1.92 (dd,  $J = 13.5, 6.6$  Hz, 1H), 1.85 – 1.77 (m, 1H). <sup>13</sup>C NMR (100 MHz, acetone-d<sub>6</sub>): δ 205.6, 202.2, 181.1, 156.1, 150.1, 126.3, 119.3, 115.3, 84.6, 70.9, 62.7, 53.0, 44.2, 38.1, 32.9. IR (neat):  $\nu_{max}$  (cm<sup>-1</sup>) = 3356, 3346, 2920, 1758, 1710, 1619, 1485, 1388, 1284, 1159, 1042, 886, 824. HRMS (EIMS) calcd. for C<sub>16</sub>H<sub>16</sub>O<sub>7</sub> [M]<sup>+</sup>: 320.0896, found 320.0900;

## Synthesis of Compound **17**

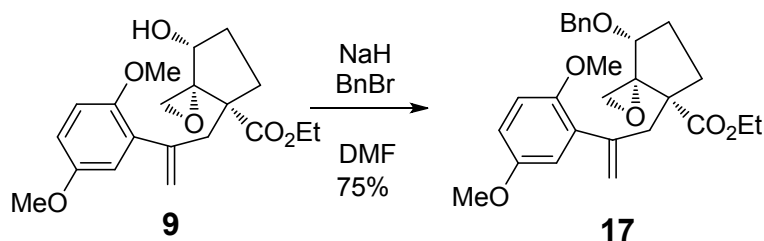

To a solution of **9** (1.00 g, 2.762 mmol, 1.0 equiv.) in DMF (10 mL) at 0°C was added NaH (60%, 132 mg, 3.314 mmol, 1.2 equiv.) and BnBr (655 μL, 5.524 mmol, 2.0 equiv.) under Ar, the mixture was stirred at 0°C for 1h. The reaction was quenched by addition of saturated aqueous NH<sub>4</sub>Cl (30 mL) and the mixture was extracted with ethyl acetate (3 × 20mL). The combined organic layers were washed with H<sub>2</sub>O (2 × 30 mL), and brine (30 mL), and dried over Na<sub>2</sub>SO<sub>4</sub> and concentrated under reduced pressure to afford crude product. It was purified by flash chromatography (Petroleum ether/EtOAc = 6/1) to afford **17** (936 mg, 75% yield) as colorless oil. R<sub>f</sub> = 0.4 (petroleum ether/EtOAc = 5/1); 99.4% *ee*. [α]<sub>D</sub><sup>25</sup> = -43.59 (c = 0.23, CHCl<sub>3</sub>); HPLC analysis: Daicel Chiralpak AD-H, *iso*-propanol/hexane = 20/80, flow rate = 1.0 mL/min, λ = 254 nm, retention time = 17.97 min (major) and 19.39 min (minor). <sup>1</sup>H NMR (400 MHz, CDCl<sub>3</sub>) δ 7.33 – 7.26 (m, 5H), 6.73 (s, 2H), 6.61 (s, 1H), 5.06 (d, *J* = 9.5 Hz, 2H), 4.55 (q, *J* = 12.3 Hz, 2H), 3.92 – 3.83 (m, 2H), 3.79 – 3.71 (m, 7H), 3.13 (d, *J* = 14.1 Hz, 1H), 2.96 (d, *J* = 5.0 Hz, 1H), 2.71 (d, *J* = 4.9 Hz, 1H), 2.55 – 2.46 (m, 2H), 2.04 – 1.97 (m, 1H), 1.90 – 1.80 (m, 1H), 1.56 – 1.49 (m, 1H), 1.12 (t, *J* = 7.1 Hz, 3H). <sup>13</sup>C NMR (100 MHz, CDCl<sub>3</sub>): δ 171.3, 153.3, 150.7, 144.6, 138.4, 132.6, 128.3, 127.6, 127.5, 118.2, 116.4, 112.8, 111.6, 71.6, 67.5, 60.6, 56.1, 55.7, 51.7, 46.4, 42.0, 28.7, 27.6, 14.0. IR (neat): ν<sub>max</sub> (cm<sup>-1</sup>) = 2940, 2833, 1729, 1581, 1496, 1218, 1046, 886, 808. HRMS (EIMS) calcd. for C<sub>27</sub>H<sub>32</sub>O<sub>6</sub> [M]<sup>+</sup>: 452.2199, found 452.2195;

## Synthesis of Compound 18

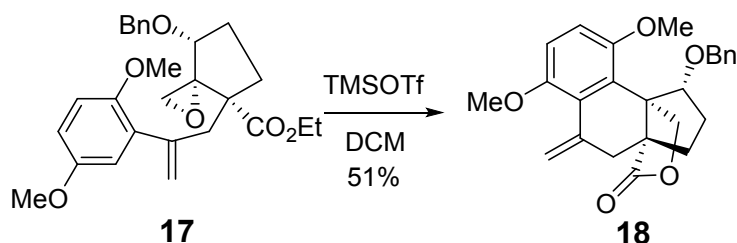

To a solution of **17** (100 mg, 0.221 mmol, 1.0 equiv.) in anhydrous DCM (1 mL) at 0°C was added TMSOTf (100 μL, 0.552 mmol, 2.5 equiv.) under Ar, the mixture was stirred at 0°C for 1h. The reaction was quenched by addition of saturated aqueous NaHCO<sub>3</sub> (10 mL), and the mixture was extracted with DCM (3 × 7 mL). The combined organic layers



were washed with brine (10 mL), dried over Na<sub>2</sub>SO<sub>4</sub> and concentrated under reduced pressure to afford crude product. It was purified by flash chromatography (Petroleum ether/EtOAc = 6/1) to afford **18** (45 mg, 51% yield) as colorless oil. R<sub>f</sub> = 0.4 (Petroleum ether/EtOAc = 5/1); [α]<sub>D</sub><sup>25</sup> = -23.04 (c = 0.22, CHCl<sub>3</sub>); <sup>1</sup>H NMR (400 MHz, CDCl<sub>3</sub>) δ 7.38 – 7.35 (m, 4H), 7.29 (dd, *J* = 8.3, 4.1 Hz, 1H), 6.79 (d, *J* = 9.0 Hz, 1H), 6.69 (d, *J* = 9.0 Hz, 1H), 5.92 (d, *J* = 1.1 Hz, 1H), 5.51 (s, 1H), 5.22 (d, *J* = 9.6 Hz, 1H), 4.69 (d, *J* = 12.4 Hz, 1H), 4.43 (d, *J* = 12.5 Hz, 1H), 4.09 (d, *J* = 9.6 Hz, 1H), 3.99 (d, *J* = 1.6 Hz, 1H), 3.79 (s, 3H), 3.58 (s, 3H), 2.51 (dd, *J* = 32.7, 12.4 Hz, 2H), 2.35 (td, *J* = 12.5, 7.6 Hz, 1H), 1.89 (ddd, *J* = 21.0, 13.3, 8.2 Hz, 2H), 1.25 – 1.18 (m, 1H). <sup>13</sup>C NMR (100 MHz, CDCl<sub>3</sub>): δ 182.2, 151.1, 150.7, 138.6, 134.1, 128.3, 127.4, 127.3, 127.0, 126.5, 119.6, 110.6, 109.9, 85.8, 72.4, 70.3, 57.1, 56.0, 55.2, 52.2, 40.4, 32.0, 30.1. IR (neat): ν<sub>max</sub> (cm<sup>-1</sup>) = 2926, 2851, 1760, 1631, 1496, 1475, 1261, 1062, 888, 802. HRMS (EIMS) calcd. for C<sub>25</sub>H<sub>26</sub>O<sub>5</sub> [M]<sup>+</sup>: 406.1780, found 406.1773;

## Synthesis of Compound 19

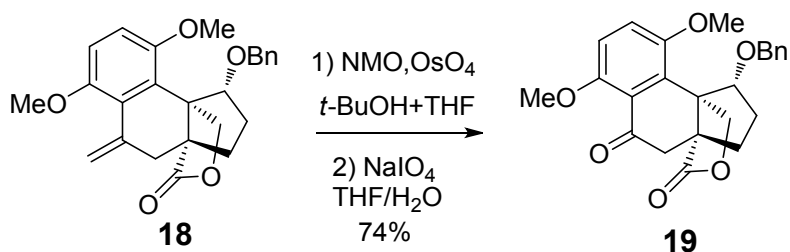

To a solution of **18** (71 mg, 0.174 mmol, 1.0 equiv.) in *t*-BuOH (1 mL) and THF (0.4 mL) at room temperature were added NMO (50% in H<sub>2</sub>O, 40 mg, 0.348 mmol, 2.0 equiv.) and OsO<sub>4</sub> (2% in H<sub>2</sub>O, 212 μL, 0.017 mmol, 0.1 equiv.), the mixture was stirred at room temperature for 7 h. The reaction was quenched by addition of saturated aqueous Na<sub>2</sub>S<sub>2</sub>O<sub>3</sub> (10 mL), and the mixture was extracted with ethyl acetate (3 × 7 mL). The combined organic layers were washed with brine (10 mL), dried over Na<sub>2</sub>SO<sub>4</sub> and concentrated under reduced pressure. The crude was used in next step without further purification.

To a solution of the crude in THF (1.2 mL) and H<sub>2</sub>O (0.6 mL) at room temperature was

added NaIO<sub>4</sub> (93 mg, 0.435 mmol, 2.5 equiv.), the mixture was stirred at room temperature for 3h. The reaction was quenched by addition of H<sub>2</sub>O (10 mL) and the mixture was extracted with ethyl acetate (3 × 7mL). The combined organic layers were washed with brine (10 mL), and dried over Na<sub>2</sub>SO<sub>4</sub> and concentrated under reduced pressure to afford crude product. It was purified by flash chromatography (Petroleum ether/EtOAc = 3/2) to afford **19** (52 mg, 74% yield) as colorless oil. R<sub>f</sub> = 0.4 (Petroleum ether/EtOAc = 1/1); 99.6% *ee*. [α]<sub>D</sub><sup>25</sup> = -212.47 (c = 0.23, CHCl<sub>3</sub>); HPLC analysis: Daicel Chiralpak AD-H, *iso*-propanol/hexane = 5/95, flow rate = 1.0 mL/min, λ = 254 nm, retention time = 19.46 min (major) and 30.46 min (minor). <sup>1</sup>H NMR (400 MHz, CDCl<sub>3</sub>) δ 7.39 – 7.29 (m, 5H), 7.00 (d, *J* = 9.1 Hz, 1H), 6.87 (d, *J* = 9.1 Hz, 1H), 5.25 (d, *J* = 9.7 Hz, 1H), 4.71 (d, *J* = 12.5 Hz, 1H), 4.42 (d, *J* = 12.5 Hz, 1H), 4.23 (d, *J* = 9.7 Hz, 1H), 4.08 (d, *J* = 1.9 Hz, 1H), 3.83 (s, 3H), 3.60 (s, 3H), 2.82 (dd, *J* = 34.1, 12.6 Hz, 2H), 2.55 – 2.47 (m, 1H), 1.92 (dd, *J* = 13.7, 8.5 Hz, 2H), 1.40 – 1.31 (m, 1H). <sup>13</sup>C NMR (100 MHz, CDCl<sub>3</sub>): δ 194.8, 179.9, 152.0, 150.1, 138.1, 131.3, 128.4, 127.5, 123.3, 116.6, 111.9, 85.3, 71.3, 70.5, 56.5, 56.3, 55.5, 52.5, 44.8, 31.9, 29.4. IR (neat): ν<sub>max</sub> (cm<sup>-1</sup>) = 2959, 2865, 1769, 1698, 1478, 1465, 1272, 1012, 870, 821. HRMS (EIMS) calcd. for C<sub>24</sub>H<sub>24</sub>O<sub>6</sub> [M]<sup>+</sup>: 408.1573, found 408.1574;

### Synthesis of Compound (-)-lingzhiol

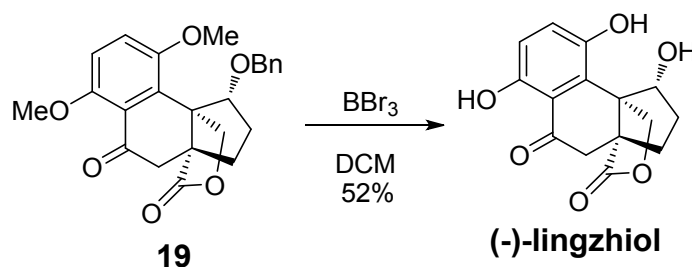

The mixture of **19** (52 mg, 0.127 mmol, 1.0 equiv.) and BBr<sub>3</sub> (1M in DCM, 1.27 mL, 1.270 mmol, 10.0 equiv.) under Ar was stirred at 0°C for 30 min, and then for 4 h at room temperature. The reaction was quenched by addition of saturated aqueous NaHCO<sub>3</sub> (7 mL) and the mixture was extracted with DCM (3 × 5mL). The combined organic layers were washed with brine (7 mL), dried over Na<sub>2</sub>SO<sub>4</sub> and concentrated

under reduced pressure to afford crude product. It was purified by flash chromatography (Petroleum ether/EtOAc = 1/1) to afford **(-)-lingzhiol** (19 mg, 52% yield) as pale yellow solid.  $R_f = 0.2$  (Petroleum ether/EtOAc = 1/1);  $[\alpha]_D^{25} = -60.7$  ( $c = 0.12$ , MeOH);  $^1\text{H}$  NMR (400 MHz, acetone- $d_6$ )  $\delta$  11.58 (s, 1H), 7.23 (d,  $J = 8.9$  Hz, 1H), 6.77 (d,  $J = 8.9$  Hz, 1H), 5.22 (d,  $J = 9.6$  Hz, 1H), 4.64 (t,  $J = 4.6$  Hz, 1H), 4.46 (d,  $J = 9.6$  Hz, 1H), 3.10 (d,  $J = 16.0$  Hz, 1H), 2.79 (d,  $J = 16.0$  Hz, 1H), 2.49 – 2.42 (m, 1H), 1.87 – 1.67 (m, 3H).  $^{13}\text{C}$  NMR (100 MHz, acetone- $d_6$ ):  $\delta$  202.3, 180.1, 156.3, 148.0, 129.1, 127.6, 117.9, 116.4, 80.7, 70.9, 56.1, 52.5, 42.3, 33.8, 33.3. IR (neat):  $\nu_{\text{max}}$  ( $\text{cm}^{-1}$ ) = 3404, 3212, 2979, 1722, 1642, 1463, 1176, 1016, 887, 803. HRMS (EIMS) calcd. for  $\text{C}_{15}\text{H}_{14}\text{O}_6$   $[\text{M}]^+$ : 290.0790, found 290.0789;

### III Comparison of the Spectra of Natural and Synthetic Compounds

**Table S1.** Comparison of  $^1\text{H}$  NMR data for (+)-**sinensilactam A** in DMSO- $d_6$

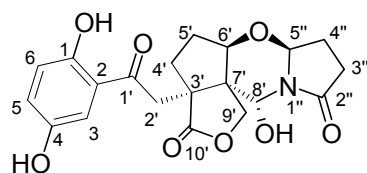

**(+)-sinensilactam A**

|       | Natural<br>$\delta$ [ppm, mult, $J$ (Hz)]<br>400 MHz | Synthetic<br>$\delta$ [ppm, mult, $J$ (Hz)]<br>400 MHz | Err<br>(Natural-Synthetic)<br>$\Delta\delta$ (ppm) |
|-------|------------------------------------------------------|--------------------------------------------------------|----------------------------------------------------|
| 3     | 7.22(d, 3.0)                                         | 7.22(d, 2.9)                                           |                                                    |
| 5     | 6.99(dd, 8.9, 3.0)                                   | 6.98(dd, 8.8, 2.9)                                     | 0.01                                               |
| 6     | 6.83(d, 8.9)                                         | 6.83(d, 8.8)                                           | -                                                  |
| 2'    | a 3.85(d, 19.1)                                      | a 3.85(d, 19.2)                                        | -                                                  |
|       | b 3.41(d, 19.1)                                      | b 3.41(d, 19.1)                                        | -                                                  |
| 4'    | a 1.85(dd, 13.7, 6.1)                                | 1.86-1.80(m)                                           | -0.01                                              |
|       | b 1.80(dd, 13.7, 6.2)                                |                                                        |                                                    |
| 5'    | a 1.90(m)                                            | a 1.89(m)                                              | 0.01                                               |
|       | b 1.55(m)                                            | b 1.55(m)                                              | -                                                  |
| 6'    | 4.32(dd, 12.1, 5.7)                                  | 4.32(dd, 12.0, 5.6)                                    | -                                                  |
| 8'    | 5.45(brs)                                            | 5.45(s)                                                | -                                                  |
| 9'    | a 4.24(d, 10.2)                                      | a 4.24(d, 10.1)                                        | -                                                  |
|       | b 3.76(d, 10.2)                                      | b 3.77(d, 10.1)                                        | -0.01                                              |
| 3''   | a 2.39(d, 17.7)                                      | 2.39-2.29(m)                                           | -                                                  |
|       | b 2.29(d, 17.7)                                      |                                                        |                                                    |
| 4''   | a 2.25(overlap)                                      | a 2.26(overlap)                                        | -0.01                                              |
|       | b 1.73(m)                                            | b 1.73(m)                                              | -                                                  |
| 5''   | 5.25(dd, 6.3, 3.7)                                   | 5.25(dd, 6.2, 3.4)                                     | -                                                  |
| 1-OH  | 10.7(s)                                              | 10.81(s)                                               | -0.11                                              |
| 4-OH  | 9.20(s)                                              | 9.21(s)                                                | -0.01                                              |
| 8'-OH | 6.53(brs)                                            | -                                                      | -                                                  |

**Table S2.** Comparison of  $^{13}\text{C}$  NMR data for (+)-sinensilactam A in DMSO- $d_6$



**(+)-sinensilactam A**

|     | Natural<br>$\delta\text{C}$ (ppm)<br>100 MHz | Synthetic<br>$\delta\text{C}$ (ppm)<br>100 MHz | <b>Err</b><br>(Natural-<br>Synthetic)<br>$\Delta\delta$ (ppm) |
|-----|----------------------------------------------|------------------------------------------------|---------------------------------------------------------------|
| 1   | 153.3                                        | 153.3                                          | -                                                             |
| 2   | 120.0                                        | 120.0                                          | -                                                             |
| 3   | 114.6                                        | 114.6                                          | -                                                             |
| 4   | 149.5                                        | 149.5                                          | -                                                             |
| 5   | 124.3                                        | 124.3                                          | -                                                             |
| 6   | 118.5                                        | 118.5                                          | -                                                             |
| 1'  | 201.6                                        | 201.6                                          | -                                                             |
| 2'  | 45.4                                         | 45.4                                           | -                                                             |
| 3'  | 51.3                                         | 51.3                                           | -                                                             |
| 4'  | 33.9                                         | 33.9                                           | -                                                             |
| 5'  | 25.0                                         | 25.0                                           | -                                                             |
| 6'  | 77.1                                         | 77.0                                           | 0.1                                                           |
| 7'  | 48.2                                         | 48.2                                           | -                                                             |
| 8'  | 75.9                                         | 75.9                                           | -                                                             |
| 9'  | 69.2                                         | 69.2                                           | -                                                             |
| 10' | 181.4                                        | 181.4                                          | -                                                             |
| 2'' | 172.6                                        | 172.5                                          | 0.1                                                           |
| 3'' | 29.3                                         | 29.3                                           | -                                                             |
| 4'' | 23.5                                         | 23.5                                           | -                                                             |
| 5'' | 84.5                                         | 84.4                                           | 0.1                                                           |

**Table S3.** Comparison of  $^1\text{H}$  NMR data for (+)-lingzhilactone **B** in acetone- $d_6$

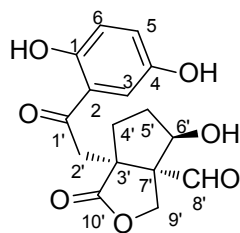

**(+)-lingzhilactone B**

|       | Natural<br>$\delta$ [ppm, mult, $J$ (Hz)]<br>600 MHz | Synthetic<br>$\delta$ [ppm, mult, $J$ (Hz)]<br>400 MHz | Err<br>(Natural-Synthetic)<br>$\Delta\delta$ (ppm) |
|-------|------------------------------------------------------|--------------------------------------------------------|----------------------------------------------------|
| 3     | 7.33(d, 2.9)                                         | 7.33(d, 2.9)                                           | -                                                  |
| 5     | 7.12(dd, 8.9, 2.9)                                   | 7.13(dd, 8.9, 2.9)                                     | -0.01                                              |
| 6     | 6.81(d, 8.9)                                         | 6.81(t, 8.2)                                           | -                                                  |
| 2'    | 3.77(s)                                              | 3.78(s)                                                | -0.01                                              |
| 4'    | 2.03(m)                                              | 2.01(dd, 16.8, 11.3)                                   | 0.02                                               |
| 5'    | a 2.06(overlap)                                      | a 2.06(s)                                              | -                                                  |
|       | b 1.58(m)                                            | b 1.59(m)                                              | -0.01                                              |
| 6'    | 4.66(dd, 11.0, 5.4)                                  | 4.66(dd, 11.0, 5.4)                                    | -                                                  |
| 8'    | 9.68(s)                                              | 9.68(s)                                                | -                                                  |
| 9'    | a 4.94(d, 9.7)                                       | a 4.94(d, 9.7)                                         | -                                                  |
|       | b 4.88(d, 9.7)                                       | b 4.88(d, 9.7)                                         | -                                                  |
| 1-OH  | 11.00(s)                                             | 10.99(s)                                               | 0.01                                               |
| 4-OH  | 8.35(brs)                                            | 8.22 (s)                                               | 0.13                                               |
| 6'-OH | -                                                    | 4.75(d, 4.8)                                           | -                                                  |

**Table S4.** Comparison of  $^{13}\text{C}$  NMR data for (+)-lingzhilactone **B** in acetone- $d_6$

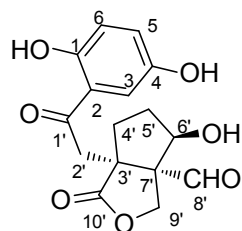

**(+)-lingzhilactone B**

|     | Natural<br>$\delta(\text{ppm})$<br>100 MHz | Synthetic<br>$\delta(\text{ppm})$<br>100 MHz | <b>Err</b><br>(Natural-Synthetic)<br>$\Delta\delta$ (ppm) |
|-----|--------------------------------------------|----------------------------------------------|-----------------------------------------------------------|
| 1   | 156.3                                      | 156.4                                        | -0.1                                                      |
| 2   | 119.4                                      | 119.4                                        | -                                                         |
| 3   | 115.3                                      | 115.4                                        | -0.1                                                      |
| 4   | 150.4                                      | 150.4                                        | -                                                         |
| 5   | 126.7                                      | 126.8                                        | -0.1                                                      |
| 6   | 119.7                                      | 119.7                                        | -                                                         |
| 1'  | 205.2                                      | 205.2                                        | -                                                         |
| 2'  | 44.4                                       | 44.5                                         | -0.1                                                      |
| 3'  | 54.3                                       | 54.4                                         | -0.1                                                      |
| 4'  | 35.4                                       | 35.5                                         | -0.1                                                      |
| 5'  | 31.9                                       | 32.0                                         | -0.1                                                      |
| 6'  | 77.8                                       | 77.9                                         | -0.1                                                      |
| 7'  | 63.6                                       | 63.7                                         | -0.1                                                      |
| 8'  | 203.3                                      | 203.2                                        | 0.1                                                       |
| 9'  | 66.9                                       | 66.9                                         | -                                                         |
| 10' | 181.2                                      | 181.2                                        | -                                                         |

**Table S5.** Comparison of  $^1\text{H}$  NMR data for (-)-**lingzhiol** in acetone- $d_6$

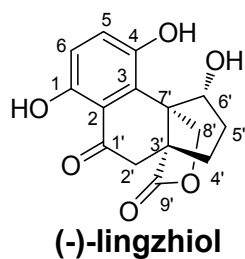

|     | Natural<br>$\delta$ [ppm, mult, $J$ (Hz)]<br>400 MHz | Synthetic<br>$\delta$ [ppm, mult, $J$ (Hz)]<br>400 MHz | <b>Err</b><br>(Natural-<br>Synthetic)<br>$\Delta\delta$ (ppm) |
|-----|------------------------------------------------------|--------------------------------------------------------|---------------------------------------------------------------|
| 5   | 7.22(d, 8.9)                                         | 7.23(d, 8.9)                                           | -0.01                                                         |
| 6   | 6.77(d, 8.9)                                         | 6.77(d, 8.9)                                           | -                                                             |
| 2'a | 3.09(d, 16.0)                                        | 3.10(d, 16.0)                                          | -0.01                                                         |
| 2'b | 2.79(d, 16.0)                                        | 2.79(d, 16.0)                                          | -0.01                                                         |
| 4'a | 2.44(m)                                              | 2.45(m)                                                | -                                                             |
| 4'b | 1.78(m)                                              | 1.78(m)                                                | -                                                             |
| 5'a | 1.83(m)                                              | 1.84(m)                                                | -0.01                                                         |
| 5'b | 1.70(m)                                              | 1.70(m)                                                | -                                                             |
| 6'  | 4.63(t, 4.8)                                         | 4.64(t, 4.6)                                           | -0.01                                                         |
| 8'a | 5.22(d, 9.6)                                         | 5.22(d, 9.6)                                           | -                                                             |
| 8'b | 4.45(d, 9.6)                                         | 4.46(d, 9.6)                                           | -0.01                                                         |



**Table S6.** Comparison of  $^{13}\text{C}$  NMR data for (-)-**lingzhiol** in acetone-*d*<sub>6</sub>

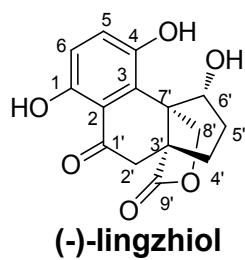

|    | Natural<br>$\delta$ [ppm]<br>100 MHz | Synthetic<br>$\delta$ [ppm]<br>100 MHz | <b>Err</b><br>(Natural-<br>Synthetic)<br>$\Delta\delta$ (ppm) |
|----|--------------------------------------|----------------------------------------|---------------------------------------------------------------|
| 1  | 156.3                                | 156.3                                  | -                                                             |
| 2  | 116.4                                | 116.4                                  | -                                                             |
| 3  | 129.1                                | 129.1                                  | -                                                             |
| 4  | 147.9                                | 148.0                                  | -0.1                                                          |
| 5  | 127.5                                | 127.6                                  | -0.1                                                          |
| 6  | 117.9                                | 117.9                                  | -                                                             |
| 1' | 202.3                                | 202.3                                  | -                                                             |
| 2' | 42.3                                 | 42.3                                   | -                                                             |
| 3' | 52.5                                 | 52.5                                   | -                                                             |
| 4' | 33.3                                 | 33.3                                   | -                                                             |
| 5' | 33.7                                 | 33.8                                   | -0.1                                                          |
| 6' | 80.6                                 | 80.7                                   | -0.1                                                          |
| 7' | 56.1                                 | 56.1                                   | -                                                             |
| 8' | 70.9                                 | 70.9                                   | -                                                             |
| 9  | 180.1                                | 180.1                                  | -                                                             |

## IV NMR Spectra for the Synthesized Compounds

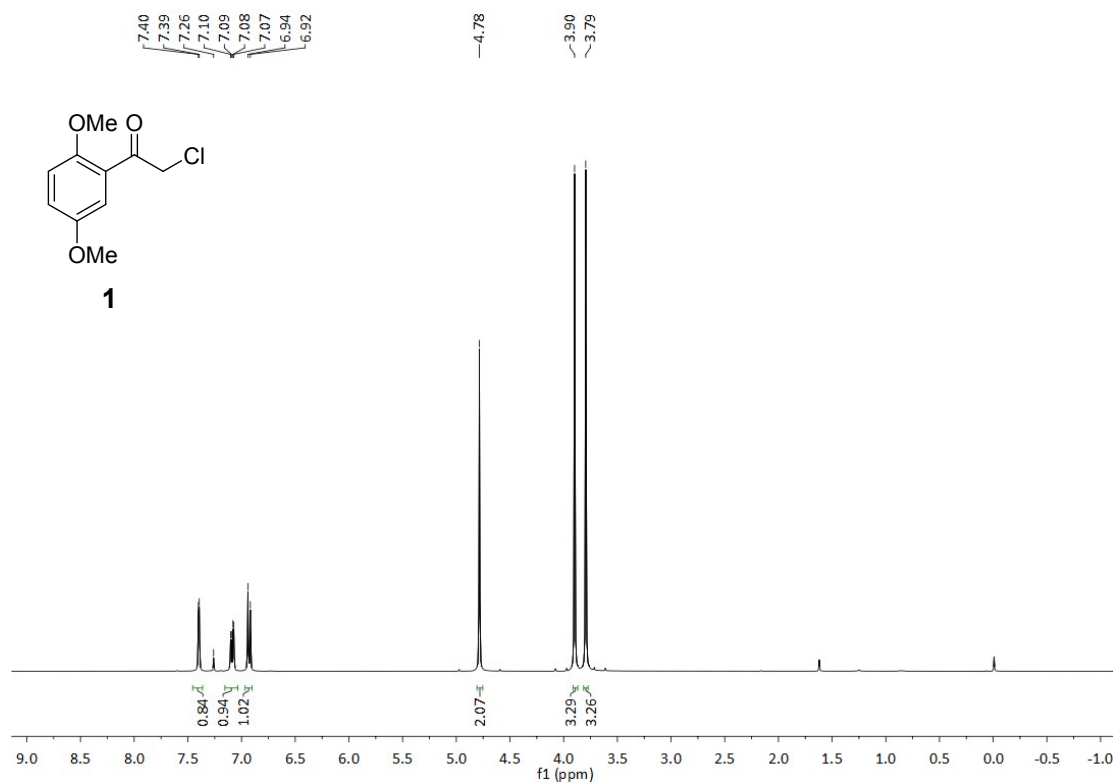

<sup>1</sup>H NMR (400 MHz, CDCl<sub>3</sub>) of compound **1**

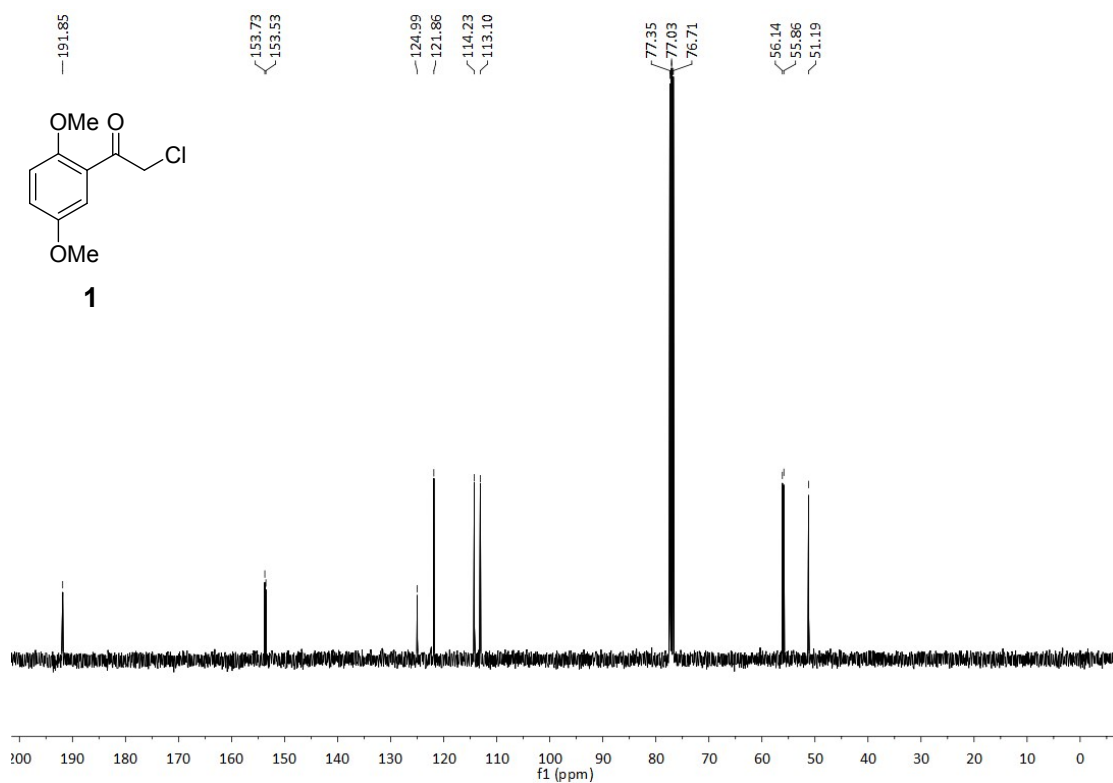

**<sup>13</sup>C NMR (100 MHz, CDCl<sub>3</sub>) of compound 1**

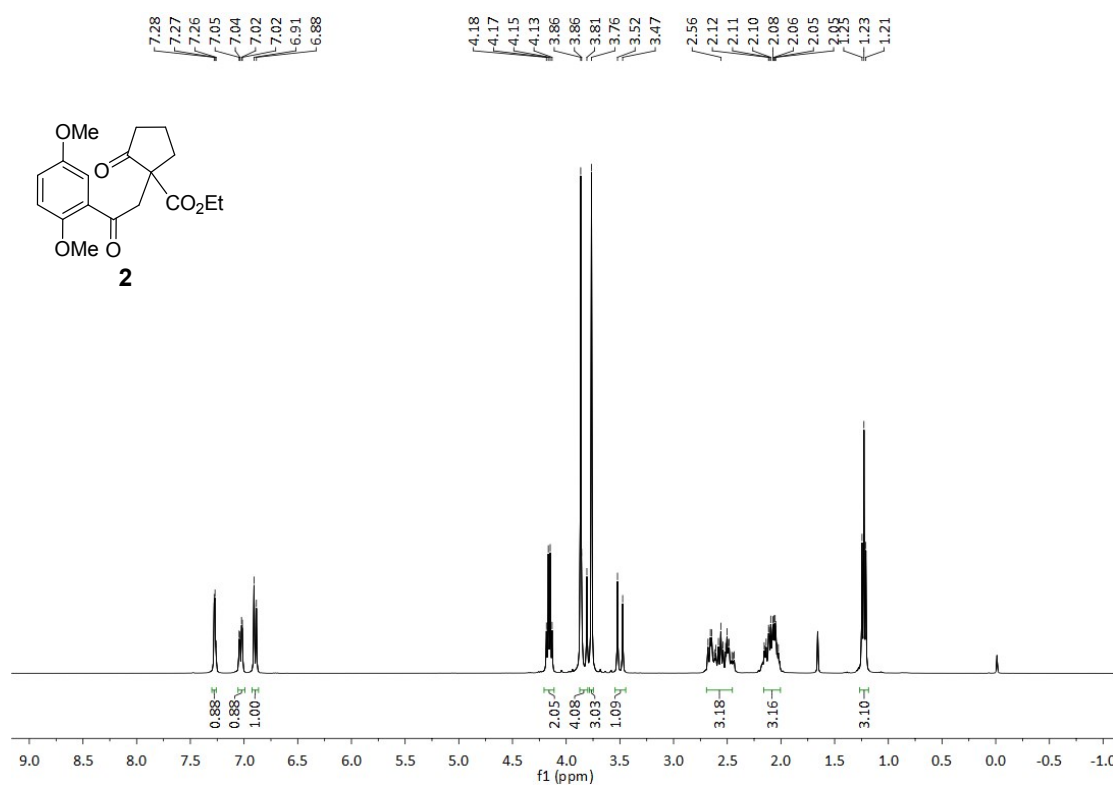

**<sup>1</sup>H NMR (400 MHz, CDCl<sub>3</sub>) of compound 2**

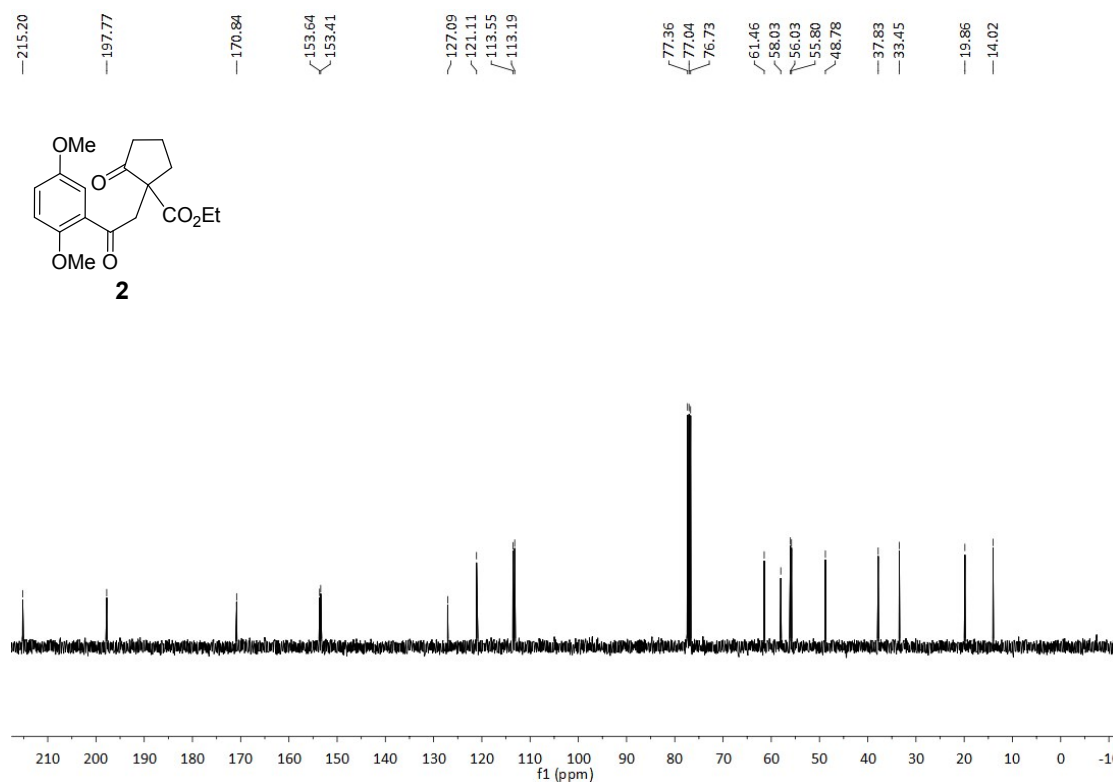

**<sup>13</sup>C NMR (100 MHz, CDCl<sub>3</sub>) of compound 2**

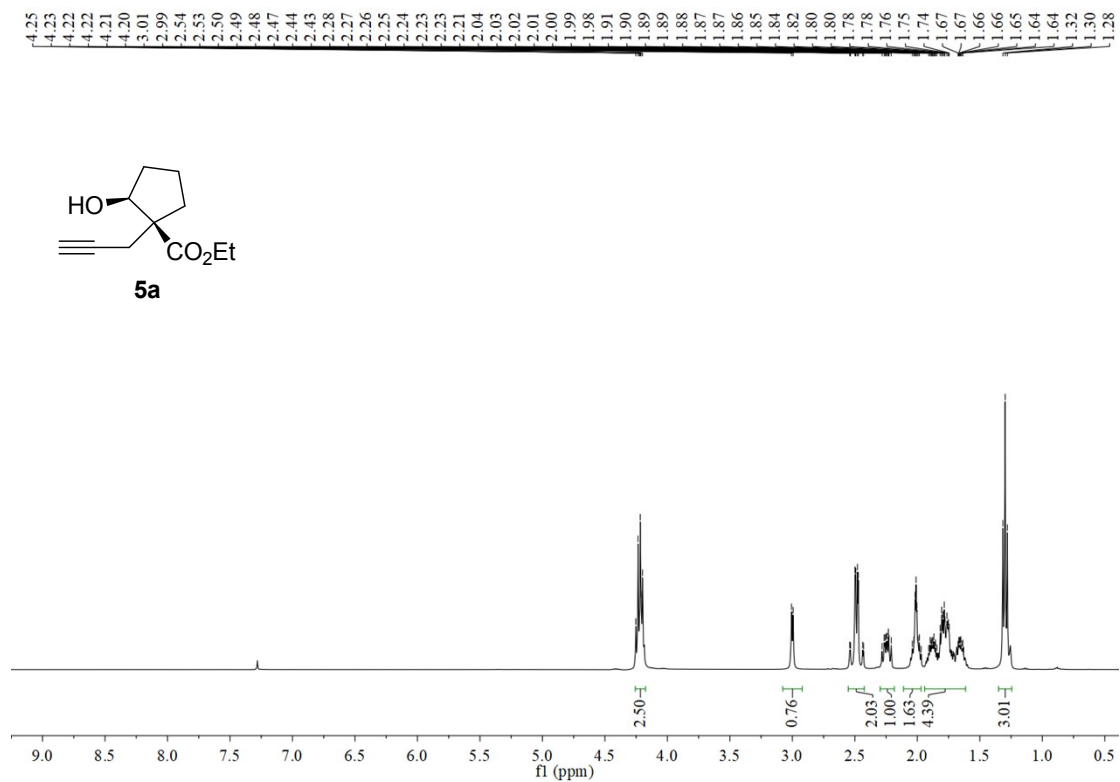

**<sup>1</sup>H NMR (400 MHz, CDCl<sub>3</sub>) of compound 5a**

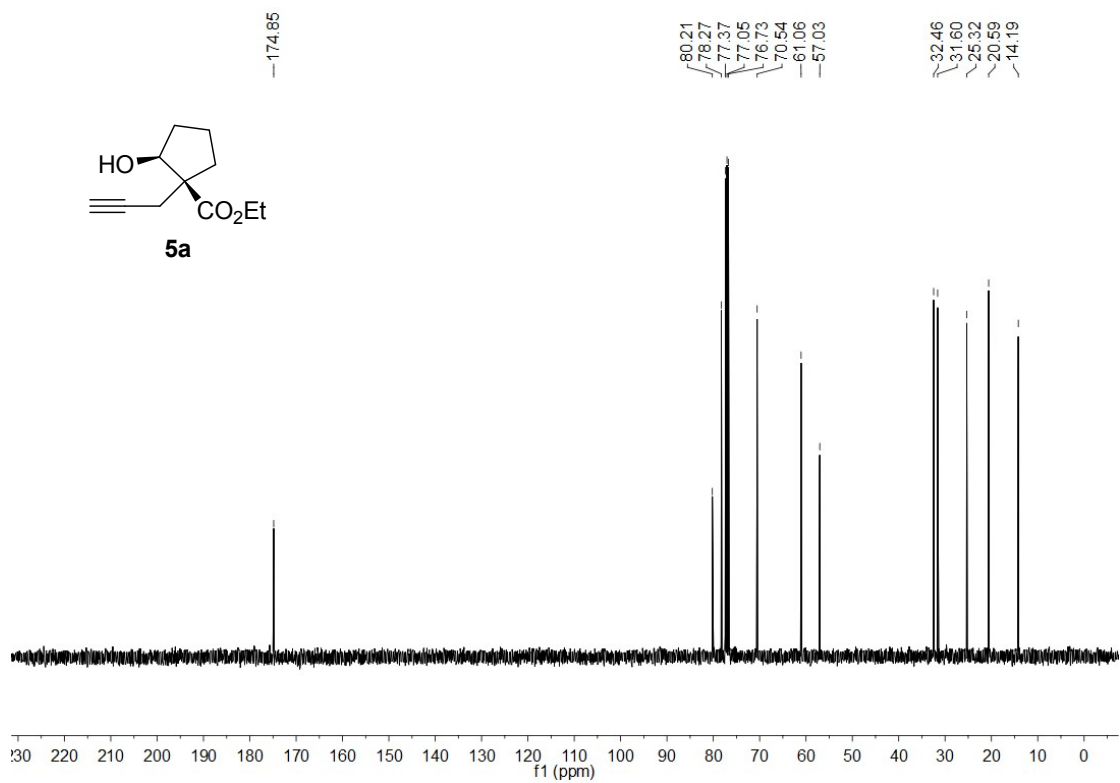

**<sup>13</sup>C NMR (100 MHz, CDCl<sub>3</sub>) of compound 5a**

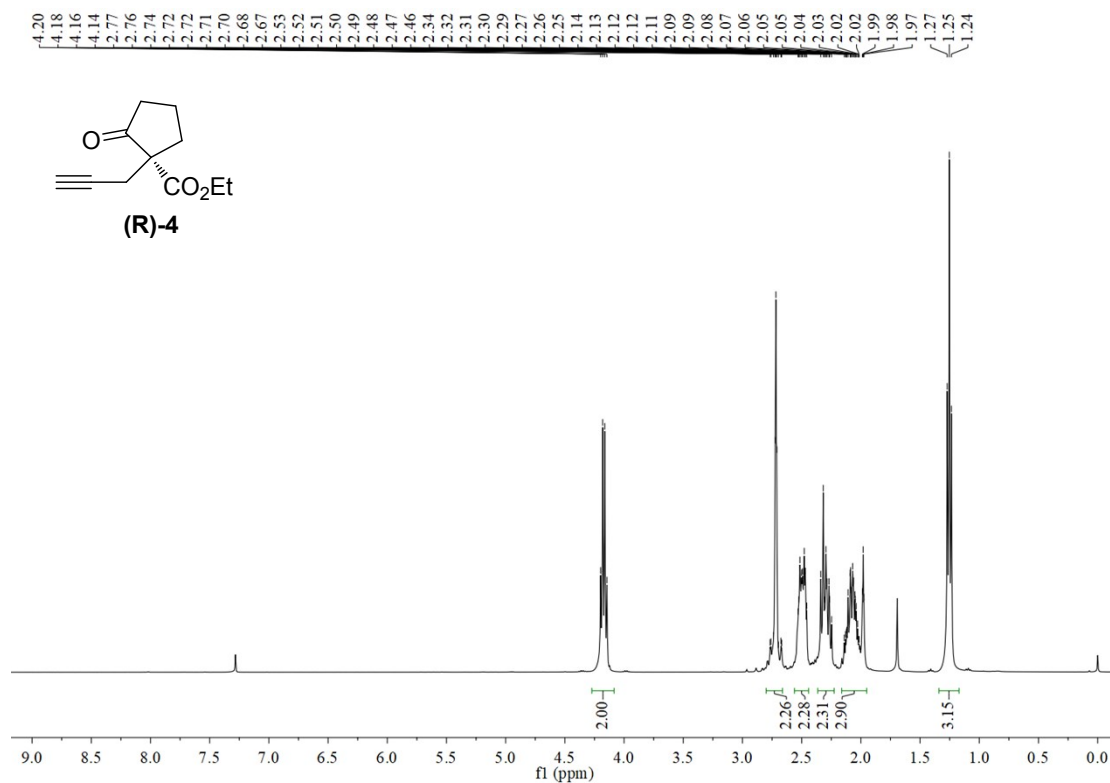

**<sup>1</sup>H NMR (400 MHz, CDCl<sub>3</sub>) of compound (R)-4**

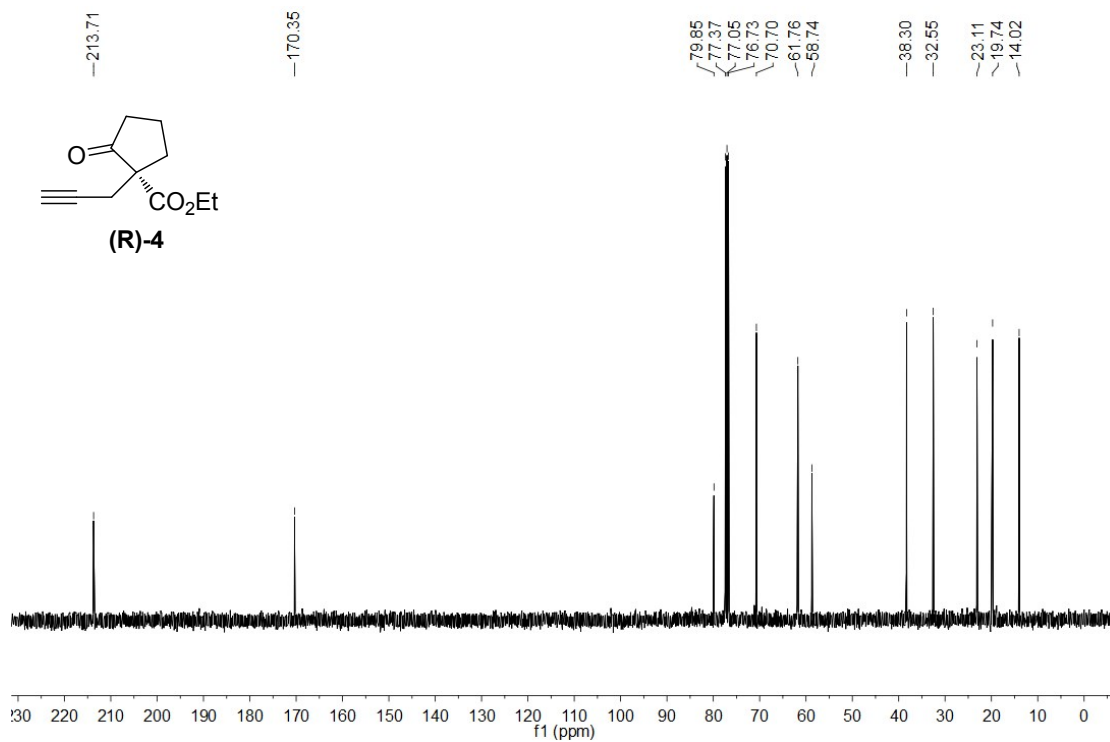

**<sup>13</sup>C NMR (100 MHz, CDCl<sub>3</sub>) of compound (R)-4**

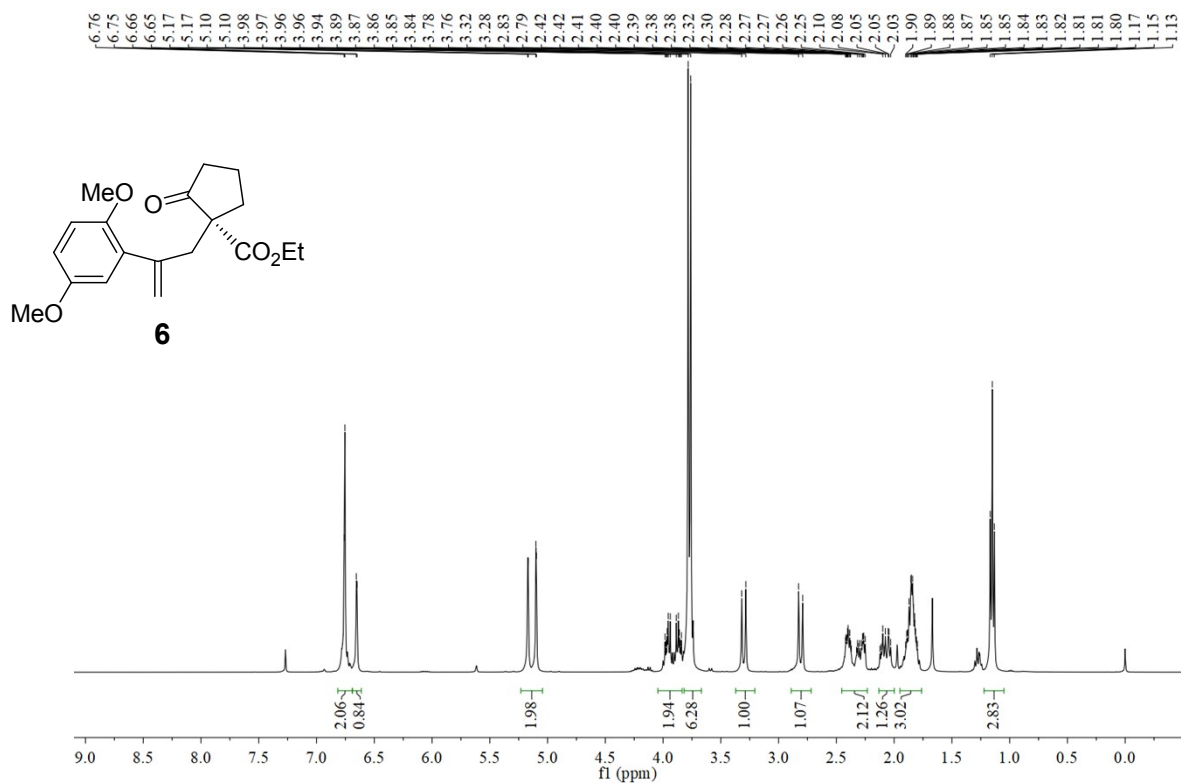

<sup>1</sup>H NMR (400 MHz, CDCl<sub>3</sub>) of compound 6

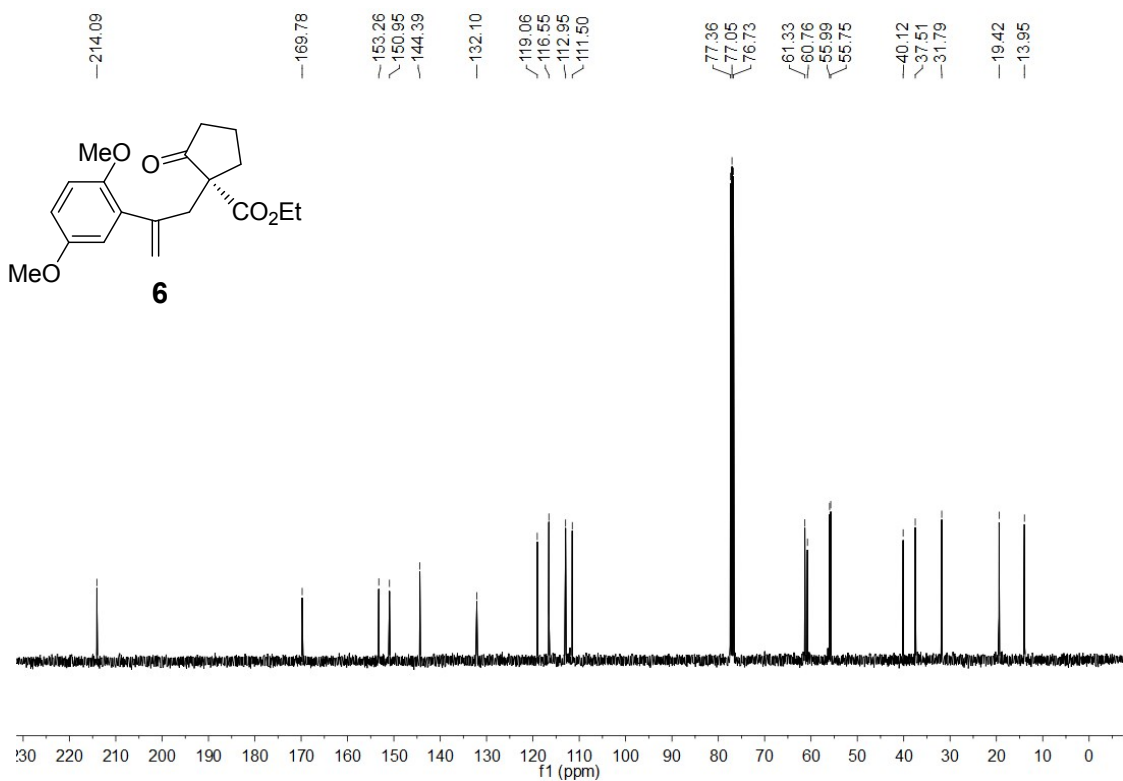

<sup>13</sup>C NMR (100 MHz, CDCl<sub>3</sub>) of compound 6

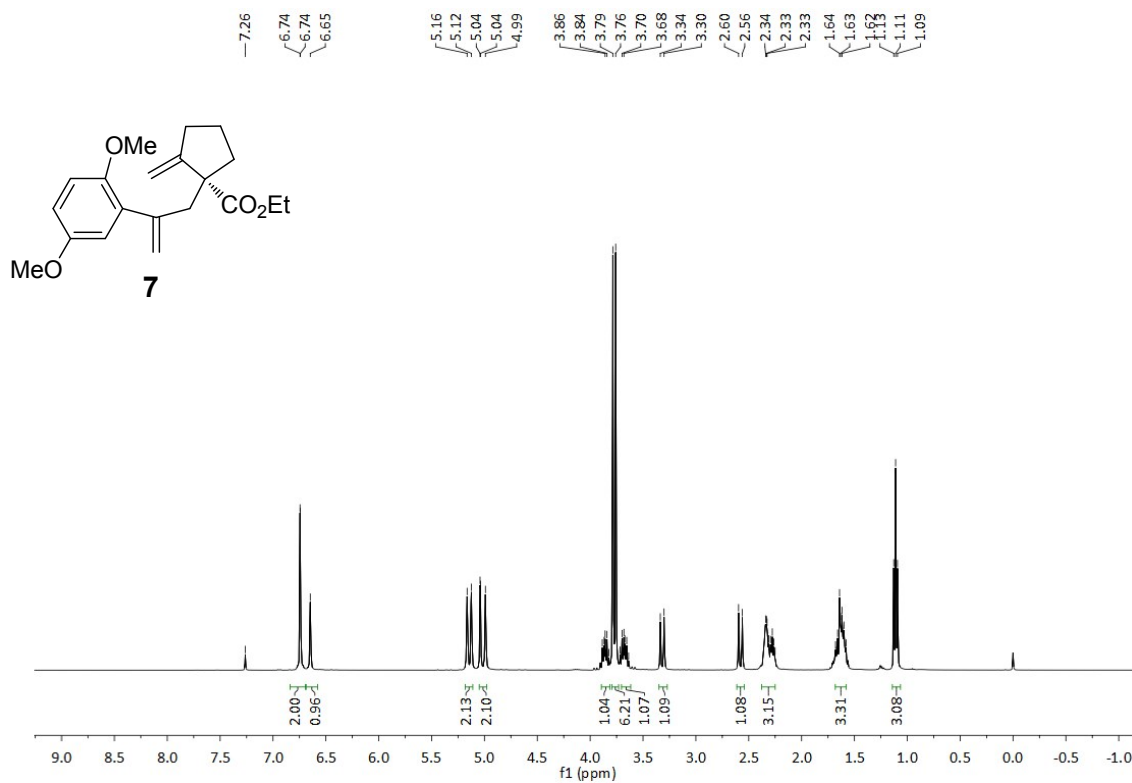

<sup>1</sup>H NMR (400 MHz, CDCl<sub>3</sub>) of compound 7

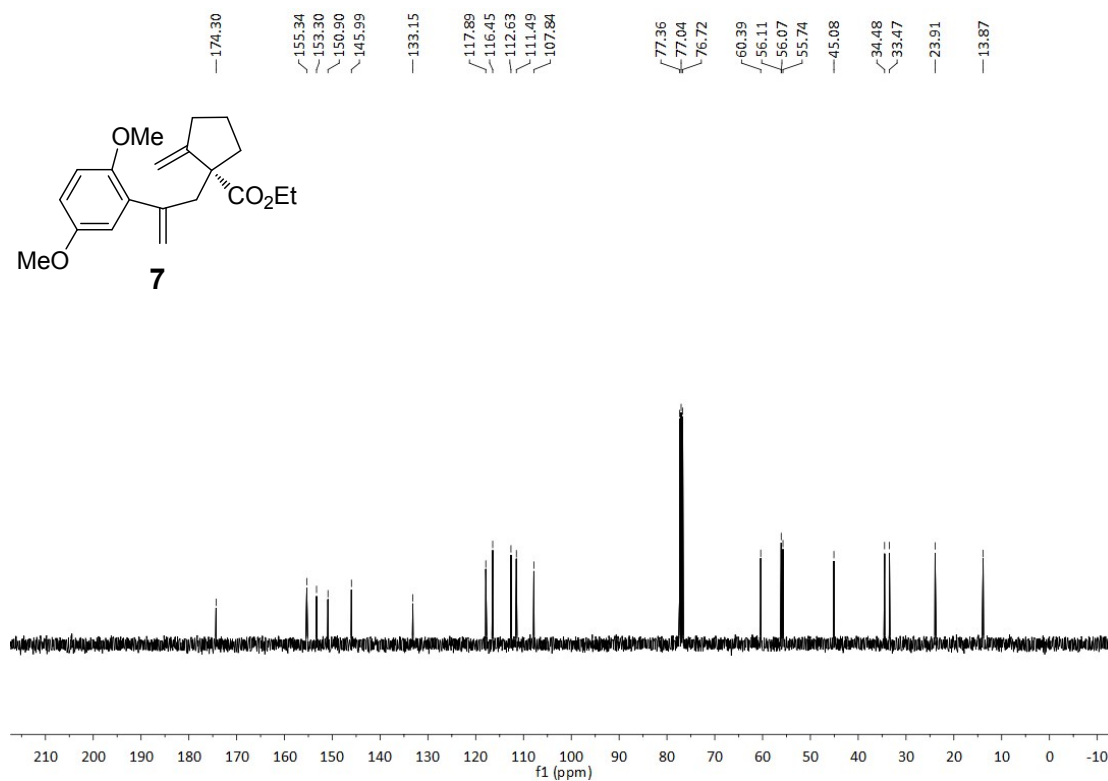

<sup>13</sup>C NMR (100 MHz, CDCl<sub>3</sub>) of compound 7

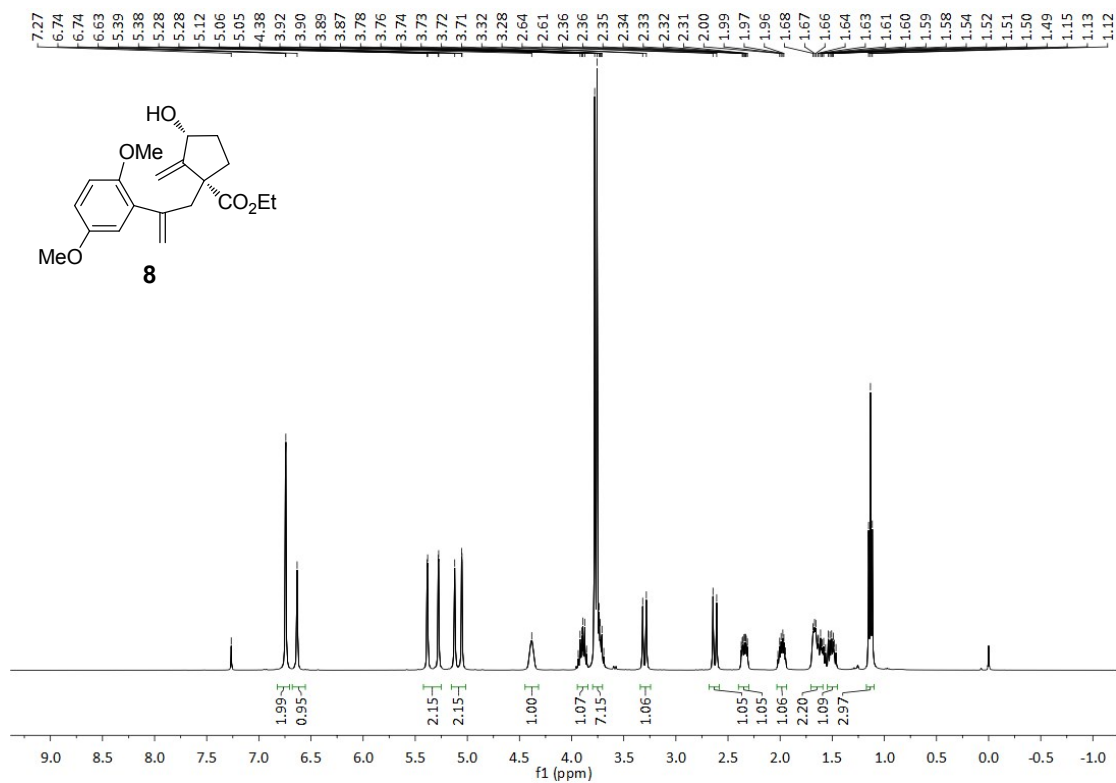

<sup>1</sup>H NMR (400 MHz, CDCl<sub>3</sub>) of compound 8

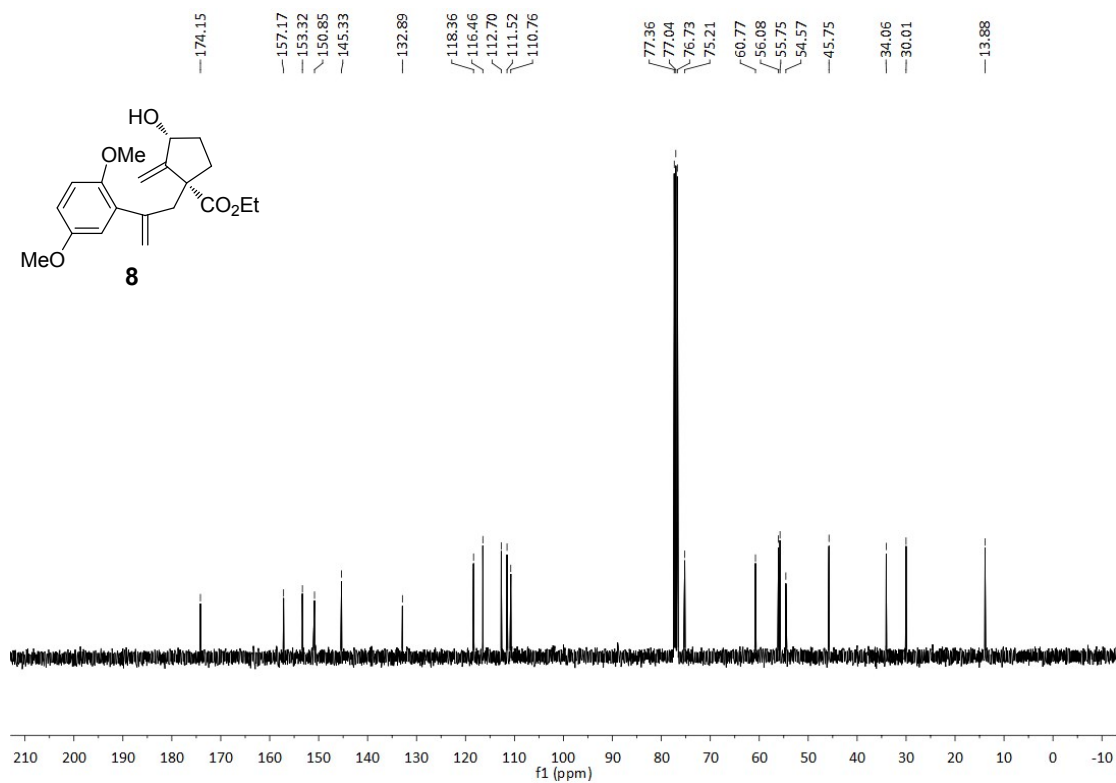

<sup>13</sup>C NMR (100 MHz, CDCl<sub>3</sub>) of compound 8



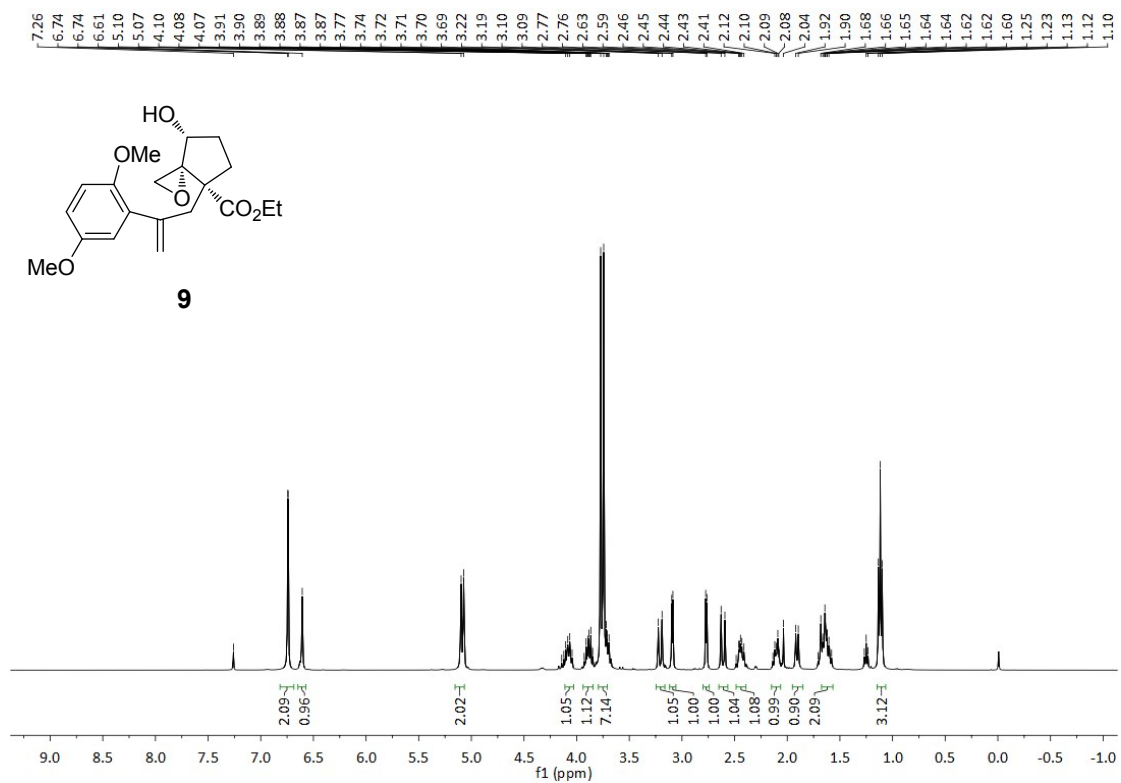

<sup>1</sup>H NMR (400 MHz, CDCl<sub>3</sub>) of compound 9

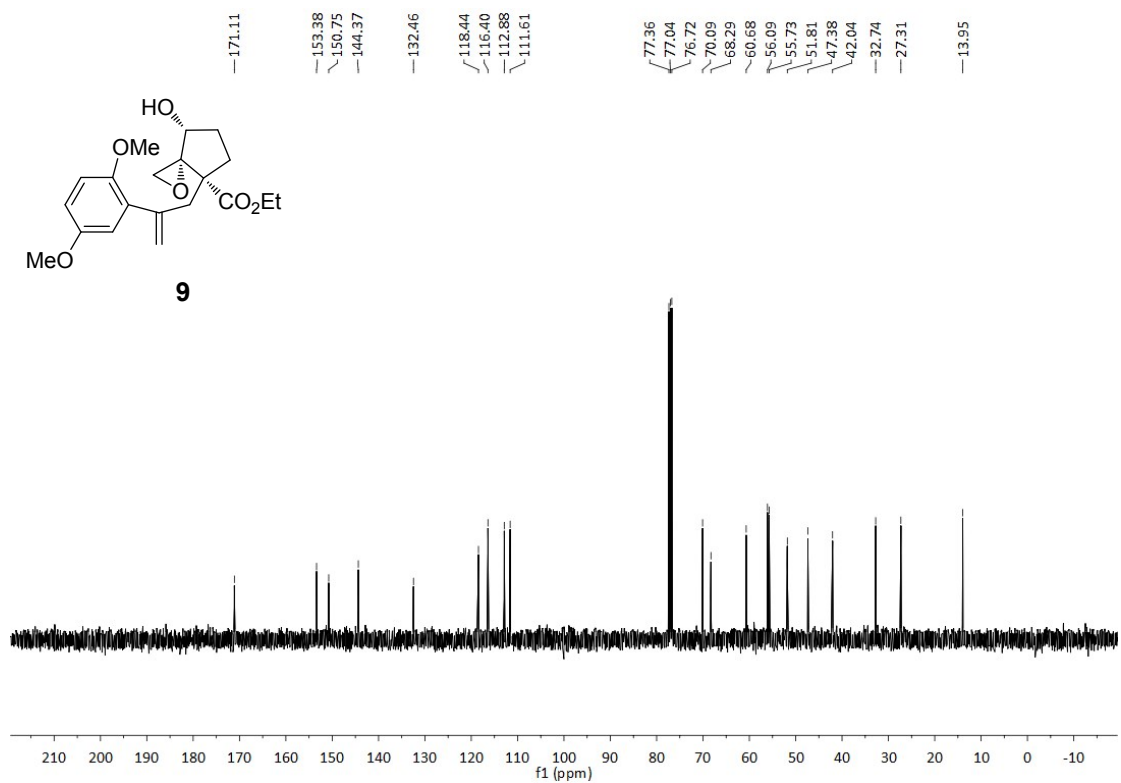

<sup>13</sup>C NMR (100 MHz, CDCl<sub>3</sub>) of compound 9

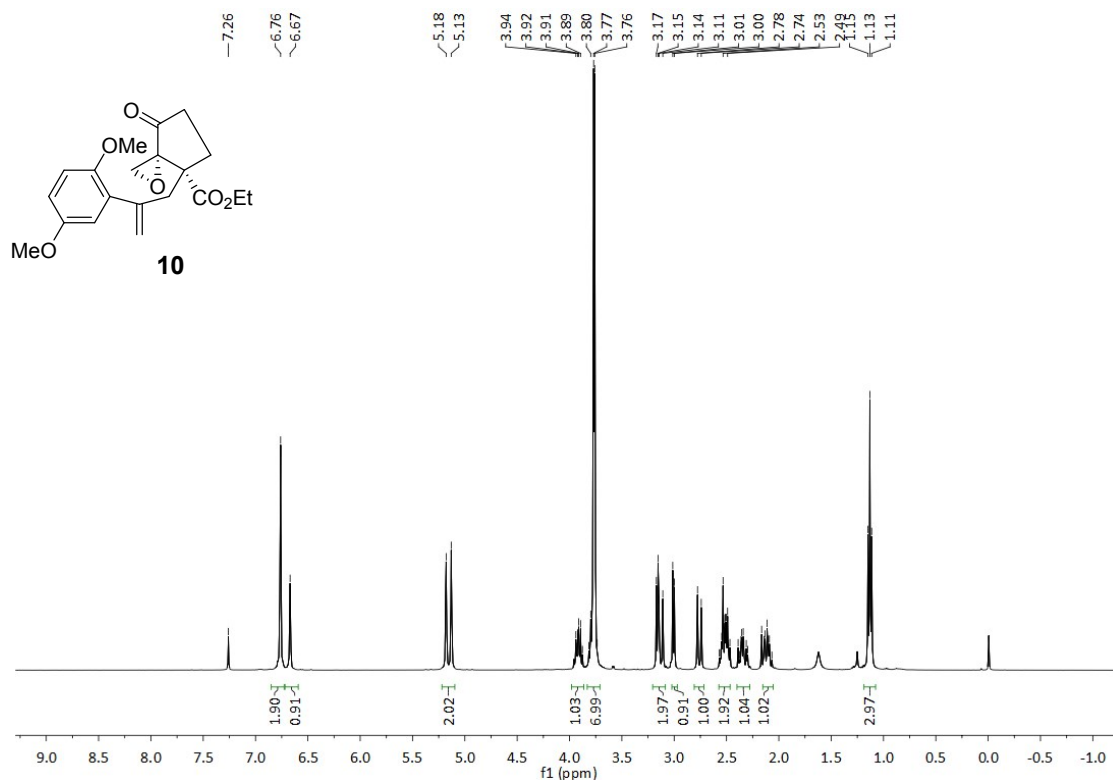

<sup>1</sup>H NMR (400 MHz, CDCl<sub>3</sub>) of compound 10

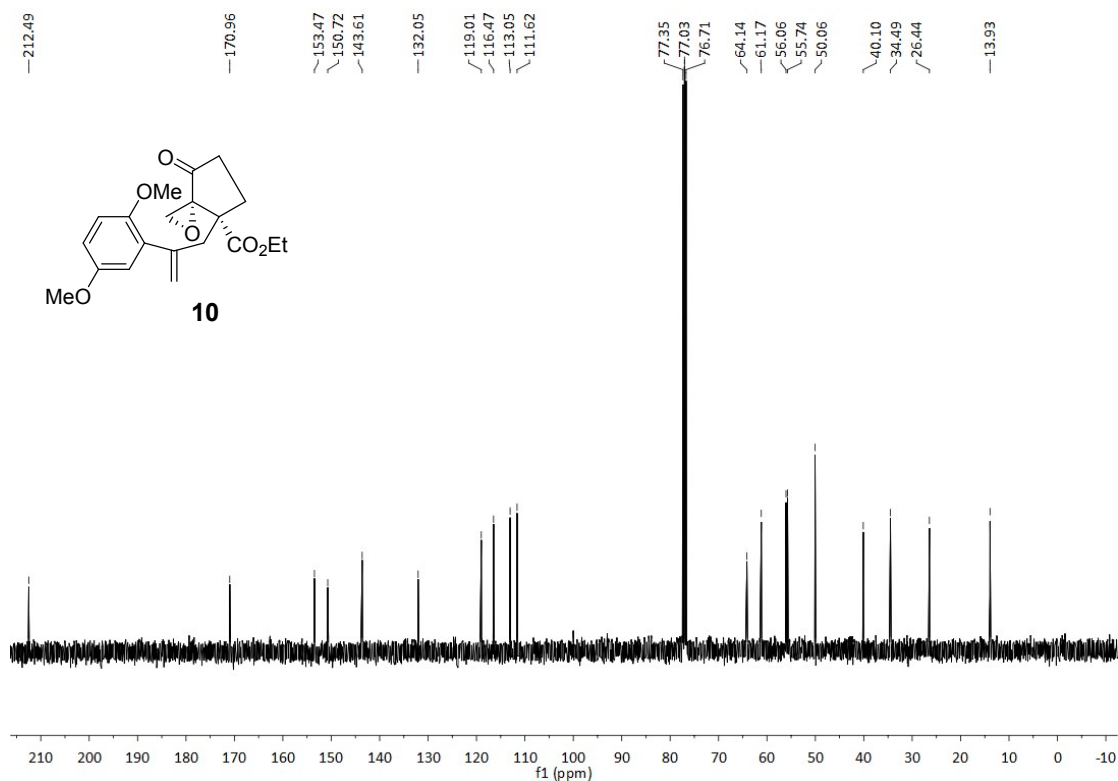

<sup>13</sup>C NMR (100 MHz, CDCl<sub>3</sub>) of compound 10

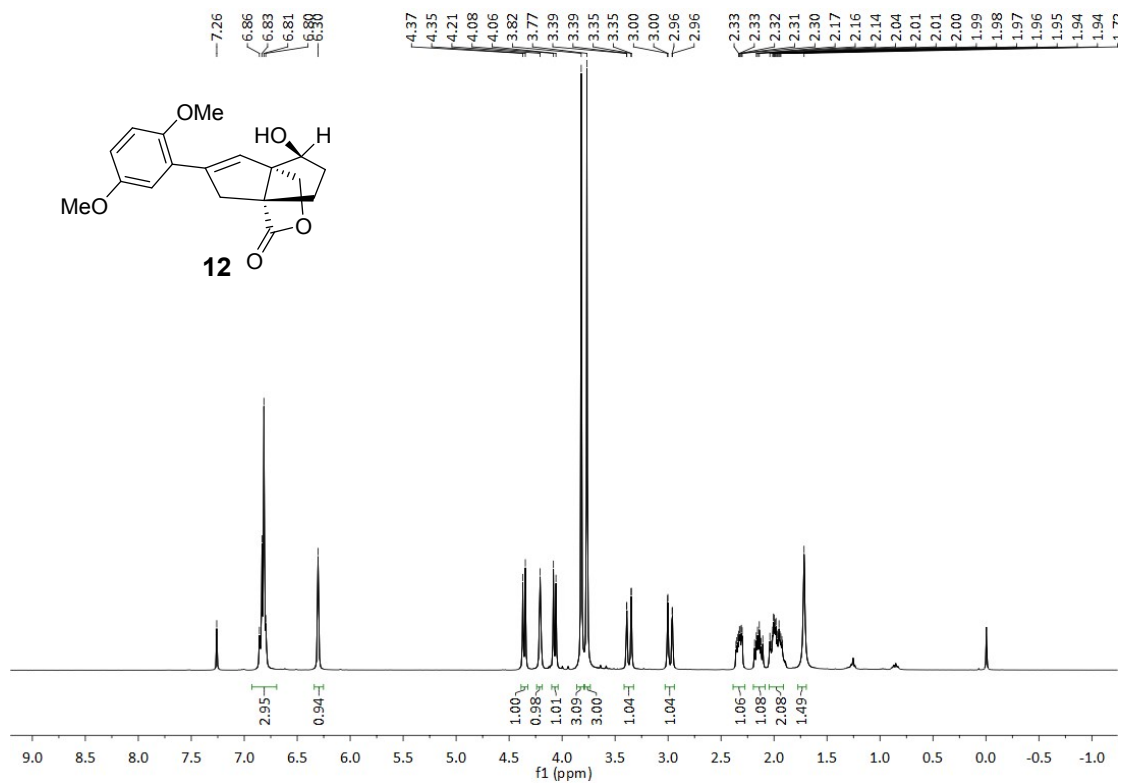

<sup>1</sup>H NMR (400 MHz, CDCl<sub>3</sub>) of compound 12

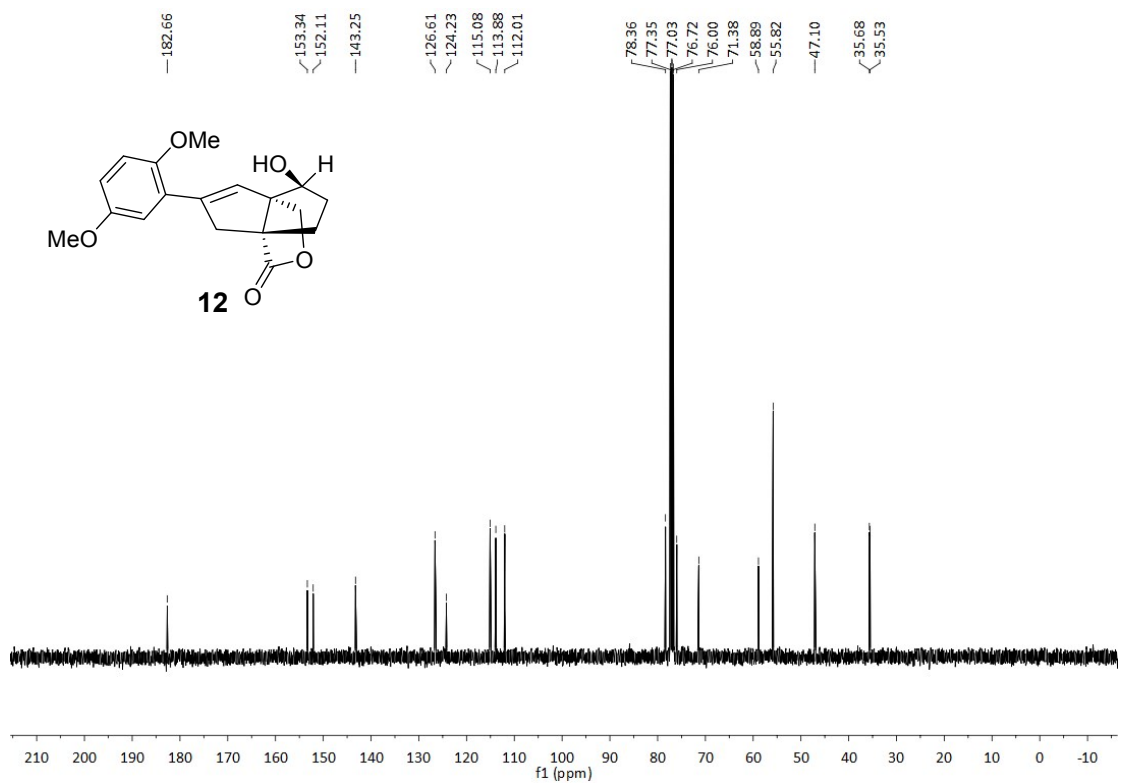

<sup>13</sup>C NMR (100 MHz, CDCl<sub>3</sub>) of compound 12

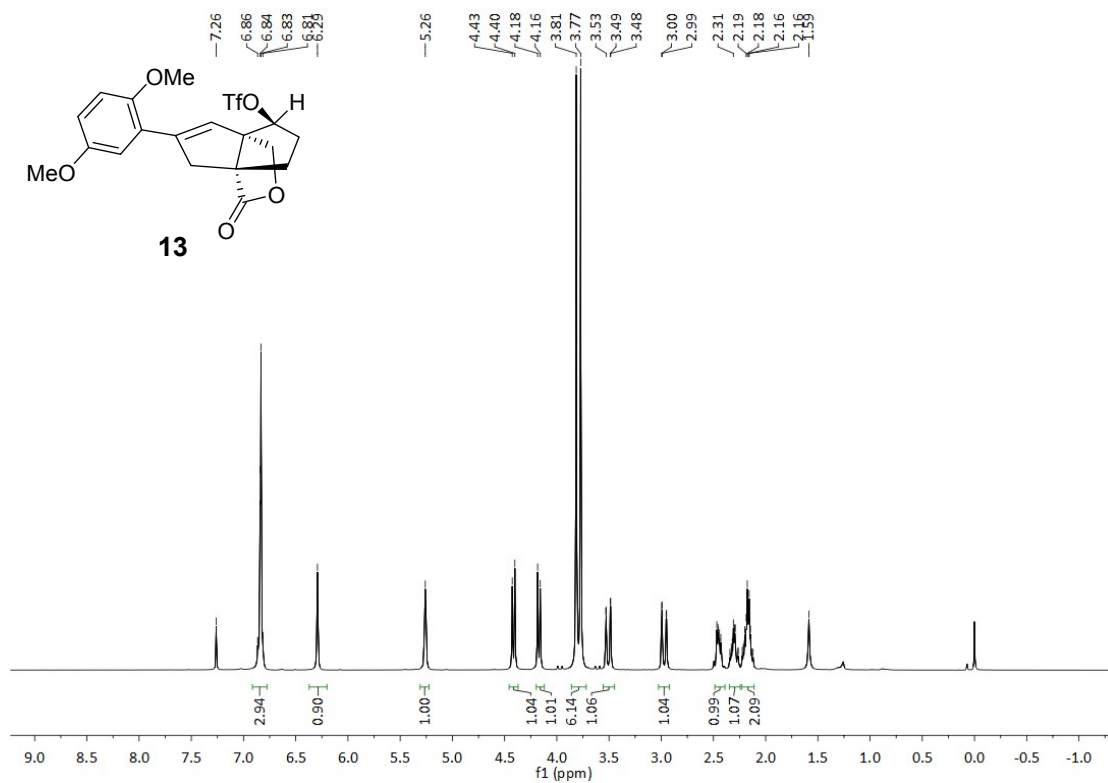

**<sup>1</sup>H NMR (400 MHz, CDCl<sub>3</sub>) of compound 13**

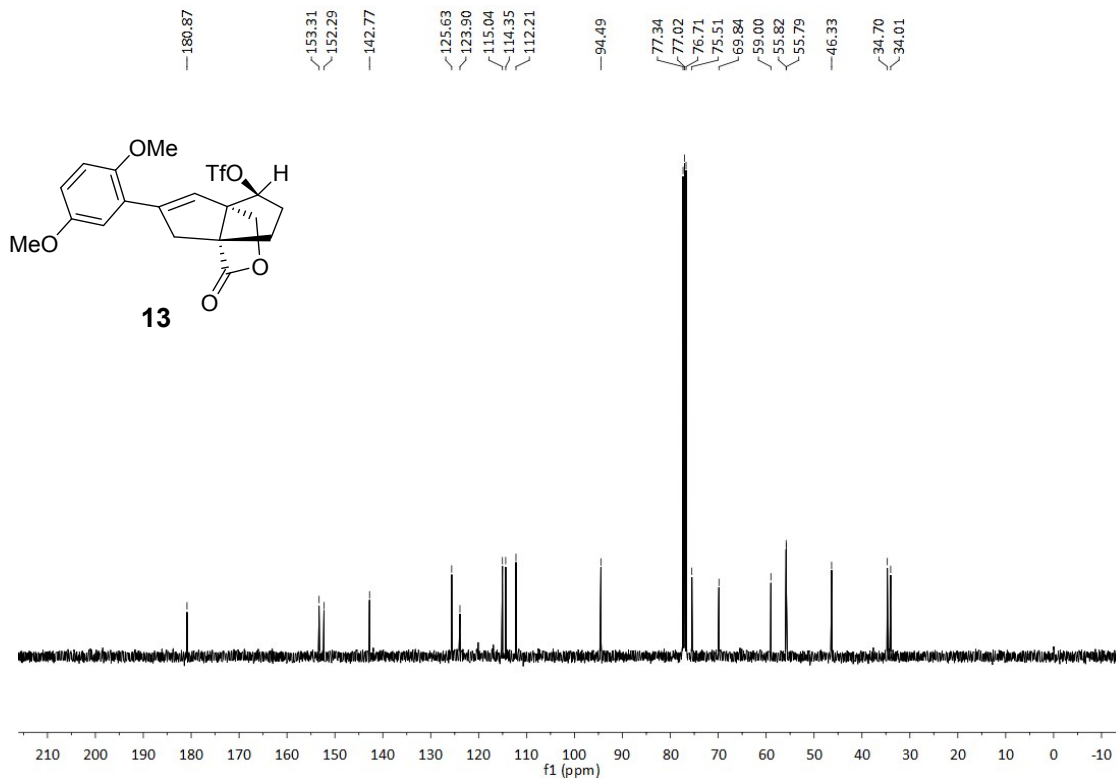

**<sup>13</sup>C NMR (100 MHz, CDCl<sub>3</sub>) of compound 13**

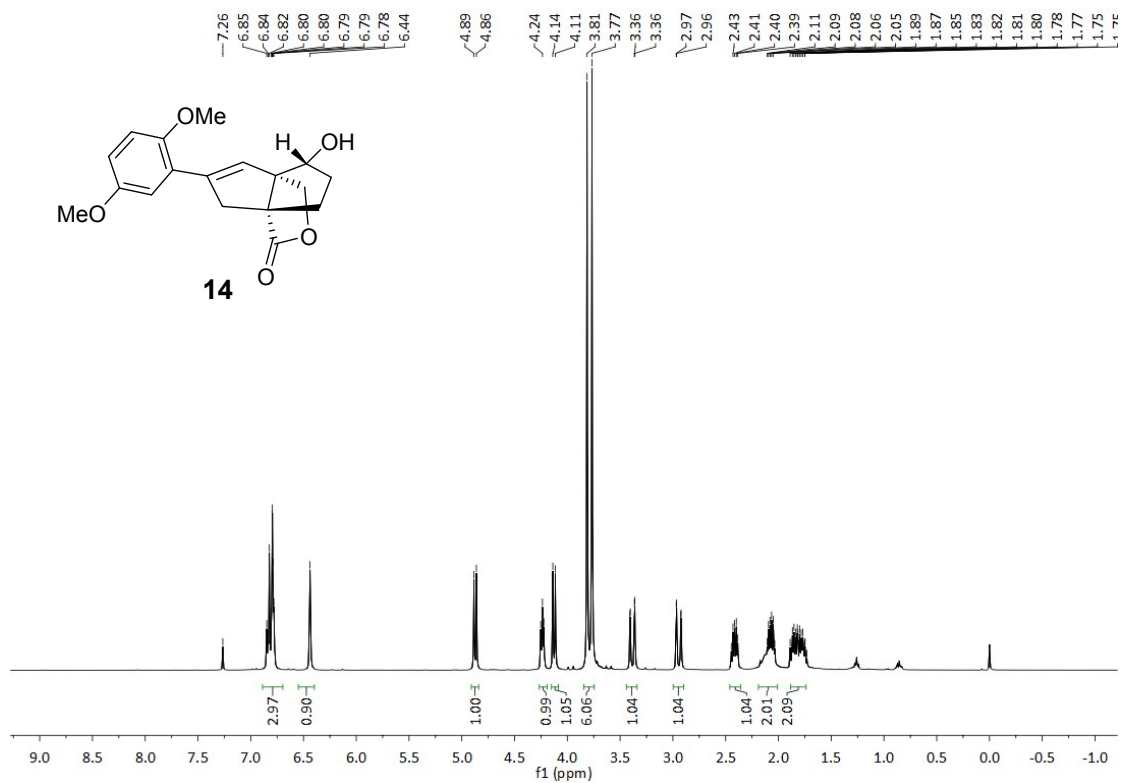

<sup>1</sup>H NMR (400 MHz, CDCl<sub>3</sub>) of compound 14

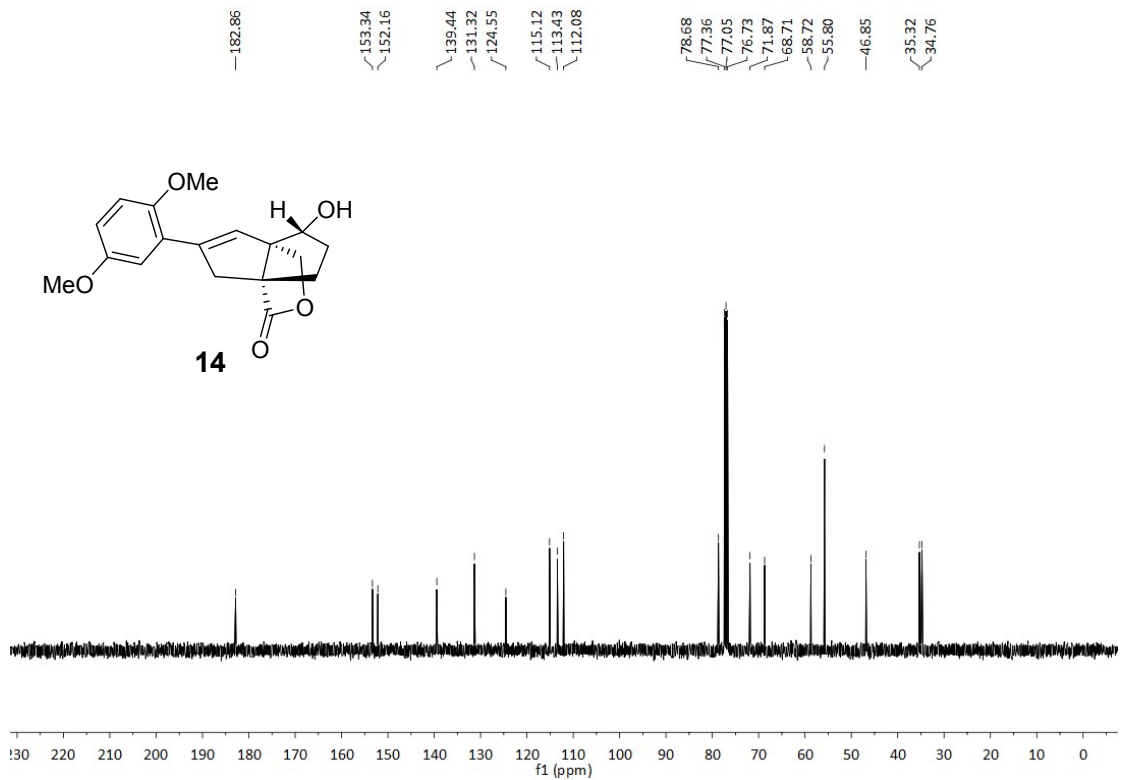

<sup>13</sup>C NMR (100 MHz, CDCl<sub>3</sub>) of compound 14

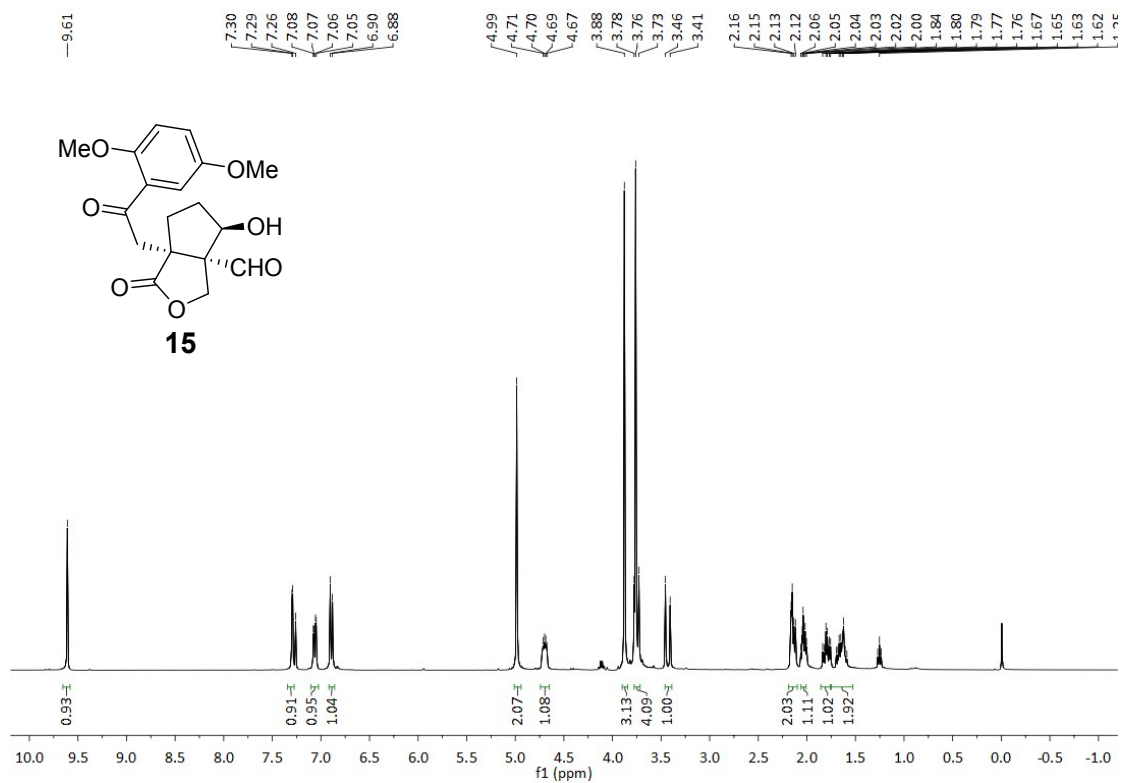

$^1\text{H}$  NMR (400 MHz,  $\text{CDCl}_3$ ) of compound 15

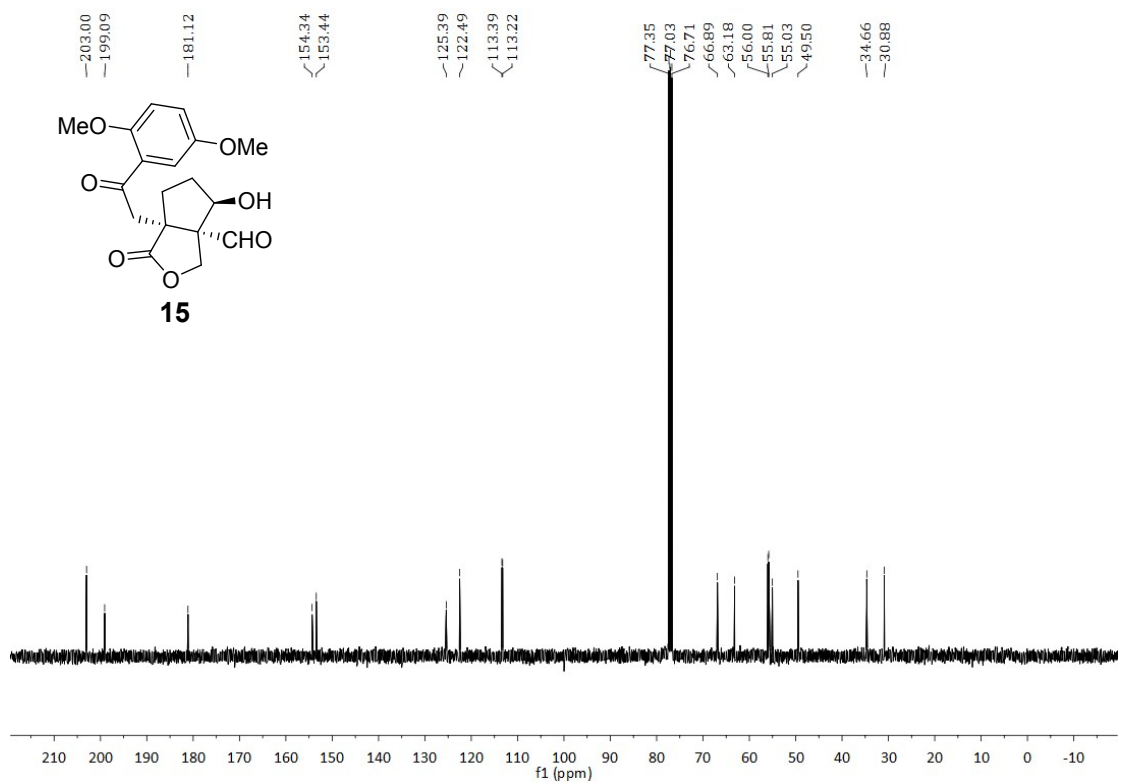

$^{13}\text{C}$  NMR (100 MHz,  $\text{CDCl}_3$ ) of compound 15

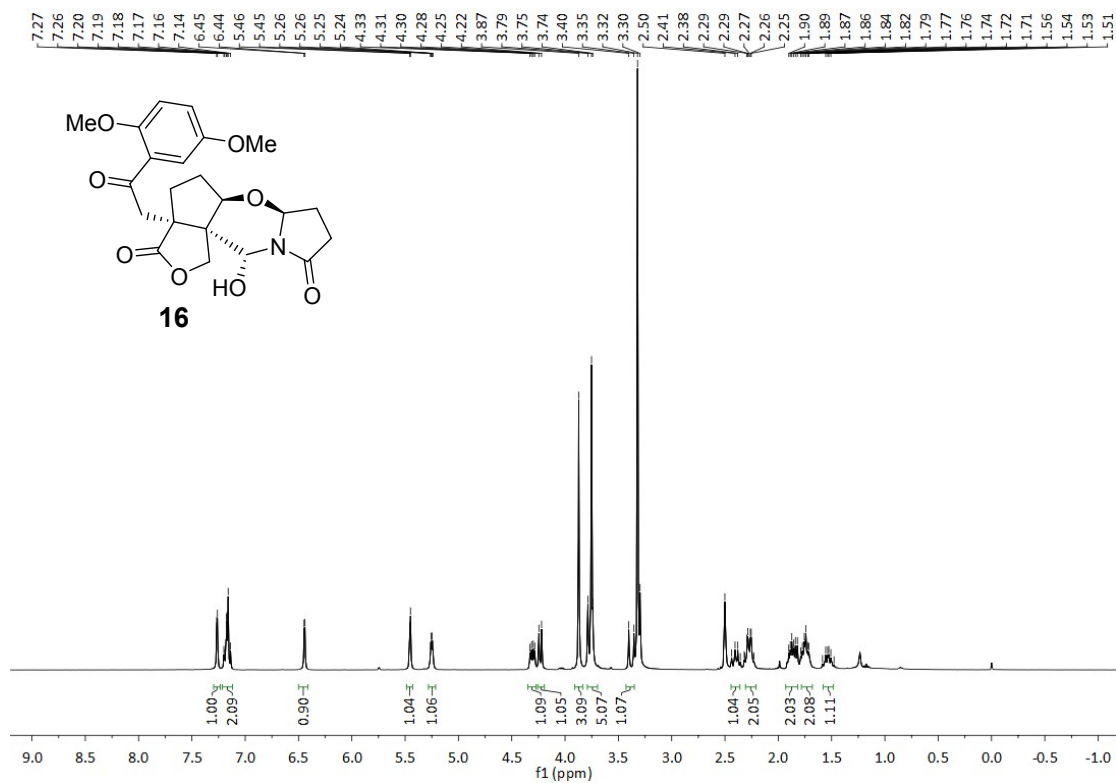

<sup>1</sup>H NMR (400 MHz, DMSO-d<sub>6</sub>) of compound 16

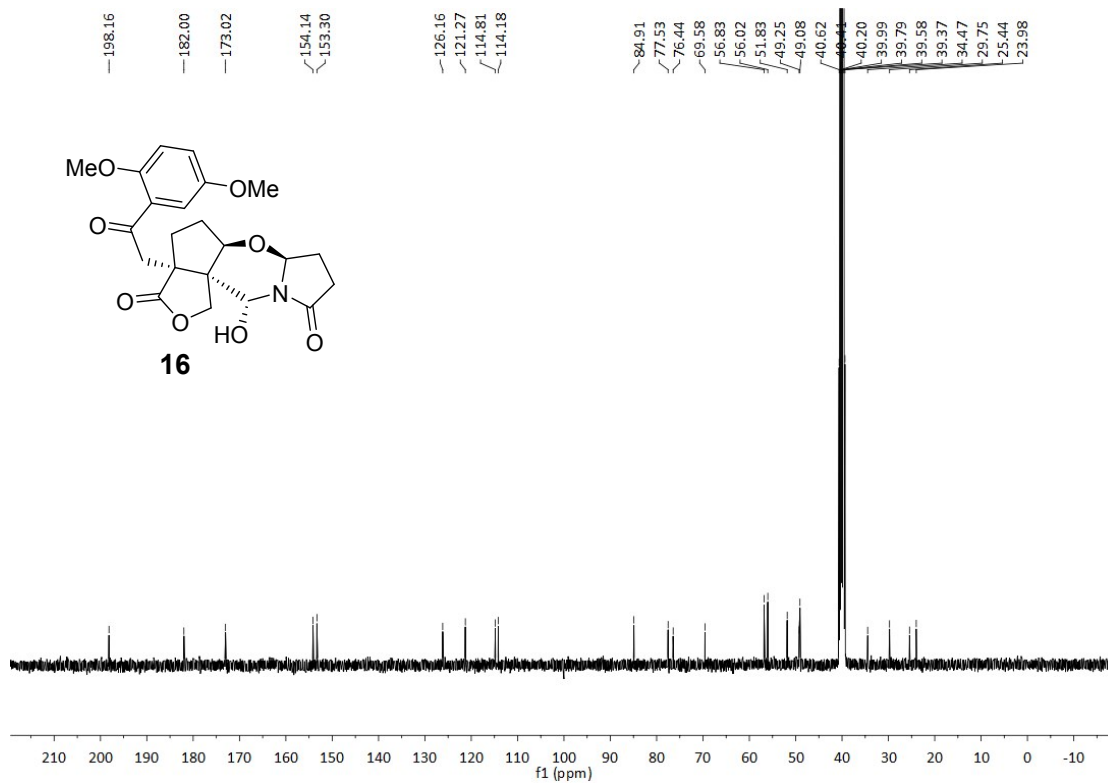

<sup>13</sup>C NMR (100 MHz, DMSO-d<sub>6</sub>) of compound 16

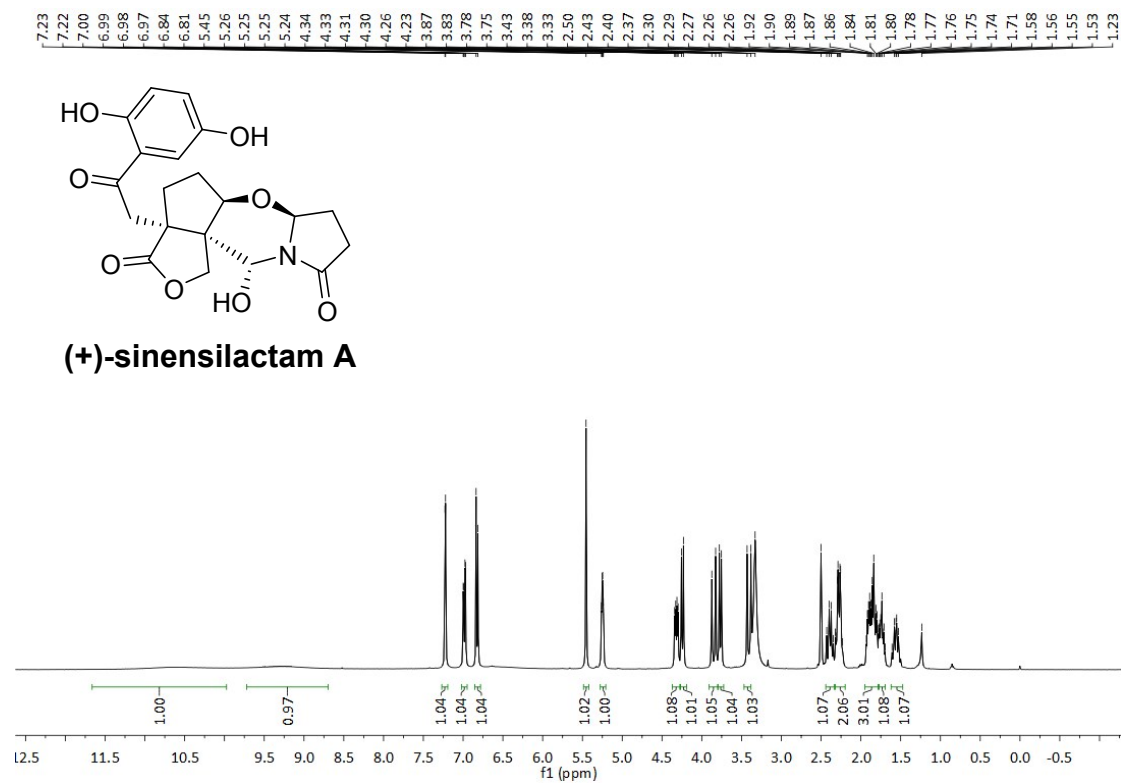

**<sup>1</sup>H NMR (400 MHz, DMSO-d<sub>6</sub>) of sinensilactam A**

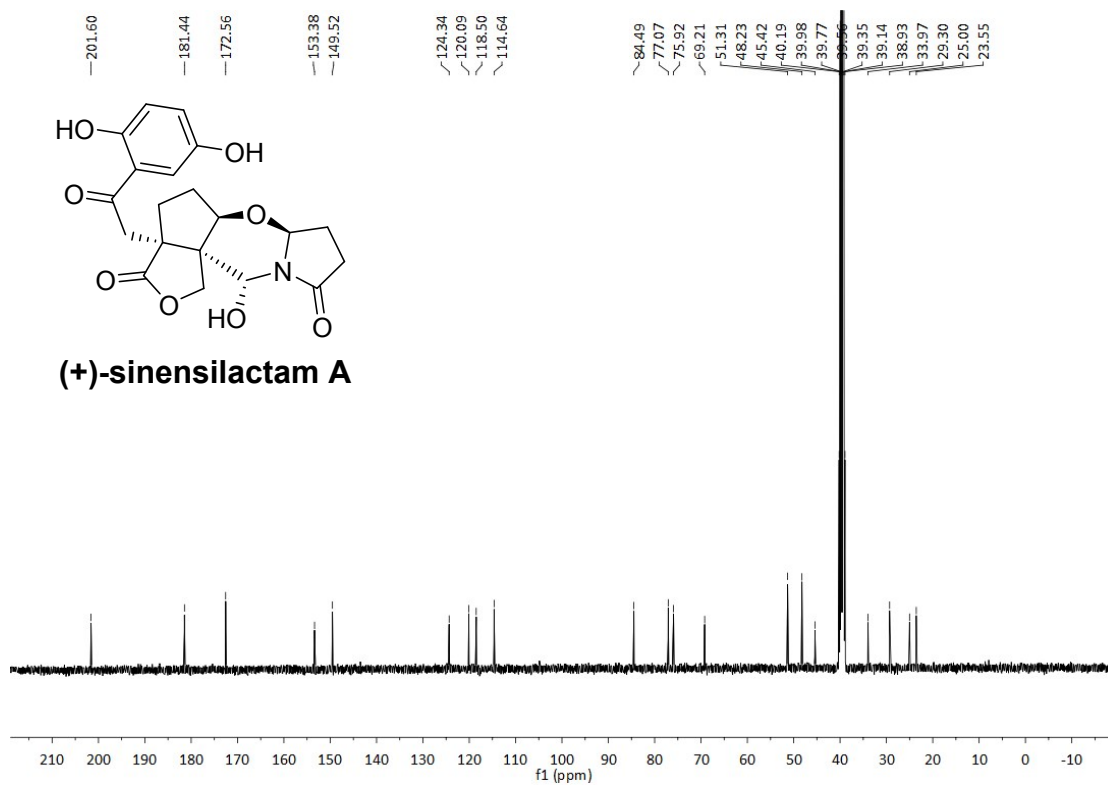

**<sup>13</sup>C NMR (100 MHz, DMSO-d<sub>6</sub>) of sinensilactam A**



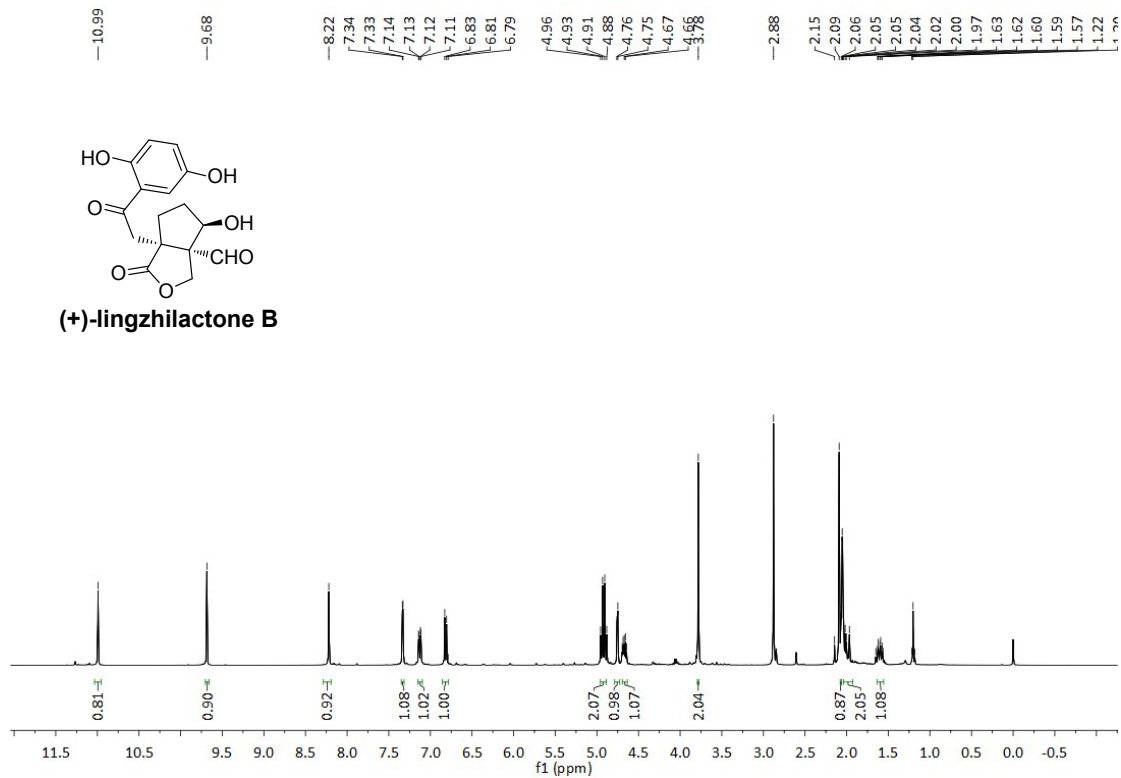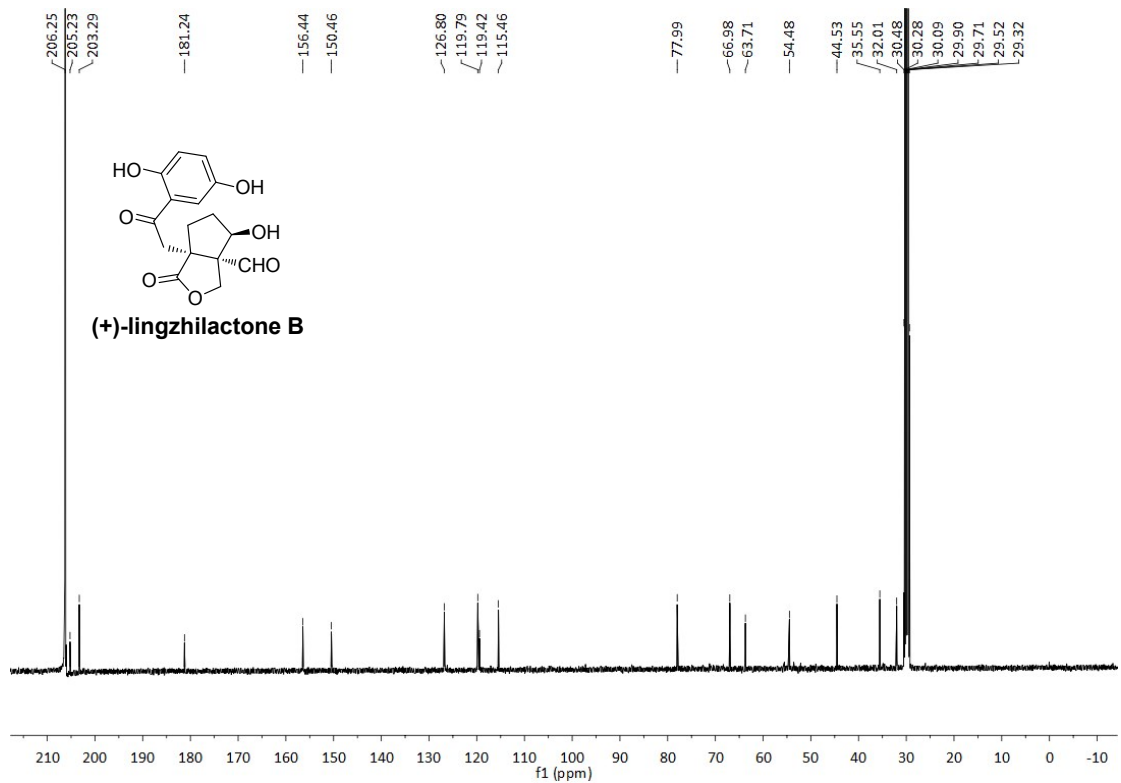

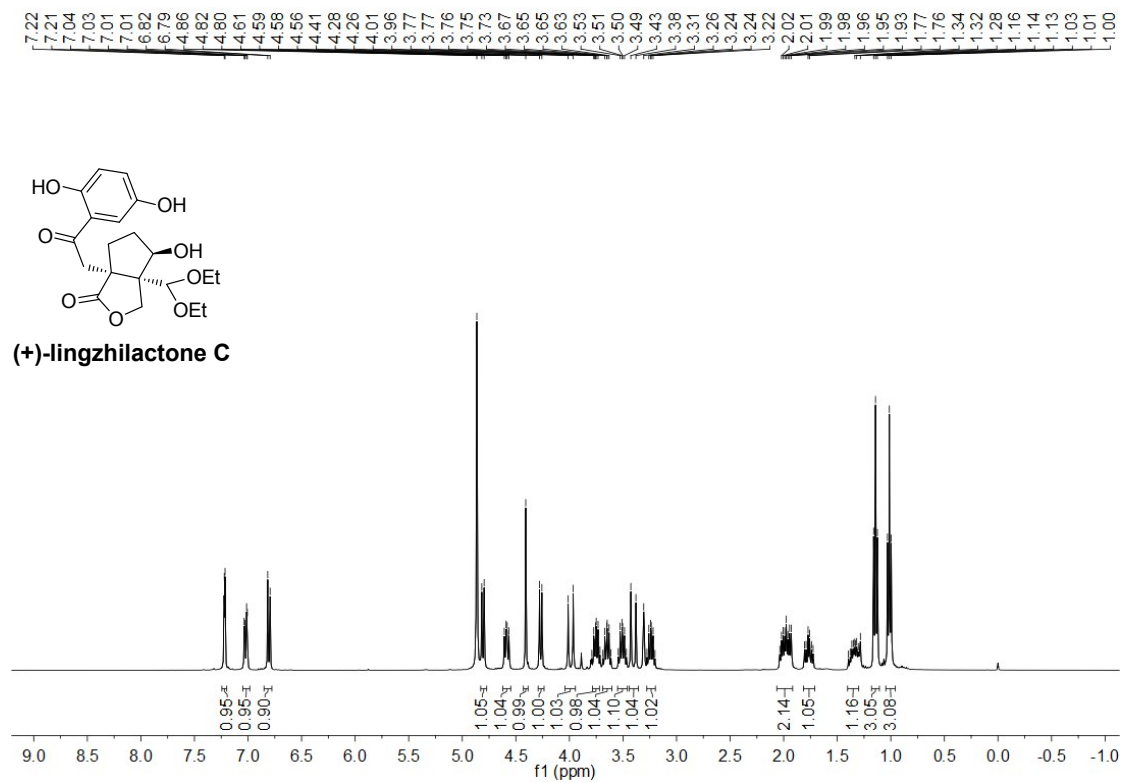

**<sup>1</sup>H NMR (400 MHz, CD<sub>3</sub>OD) of lingzhilactone C**

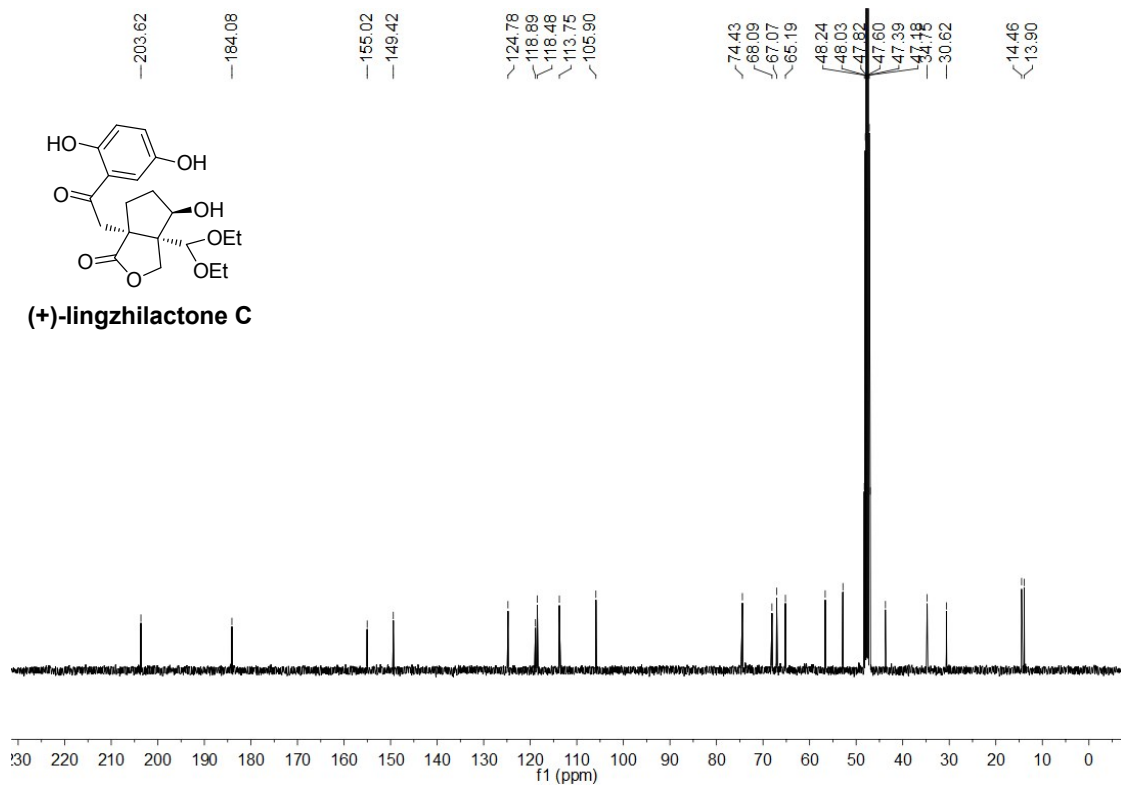

**<sup>13</sup>C NMR (100 MHz, CD<sub>3</sub>OD) of lingzhilactone C**

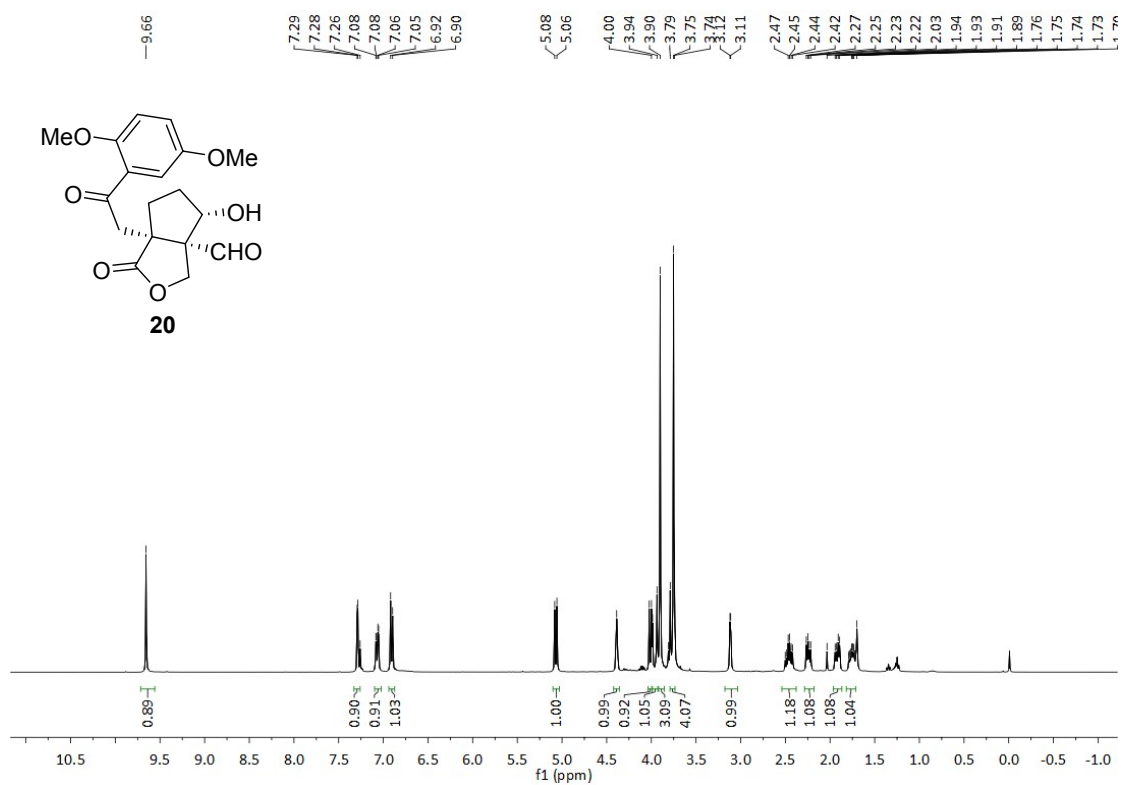

**<sup>1</sup>H NMR (400 MHz, CDCl<sub>3</sub>) of compound 20**

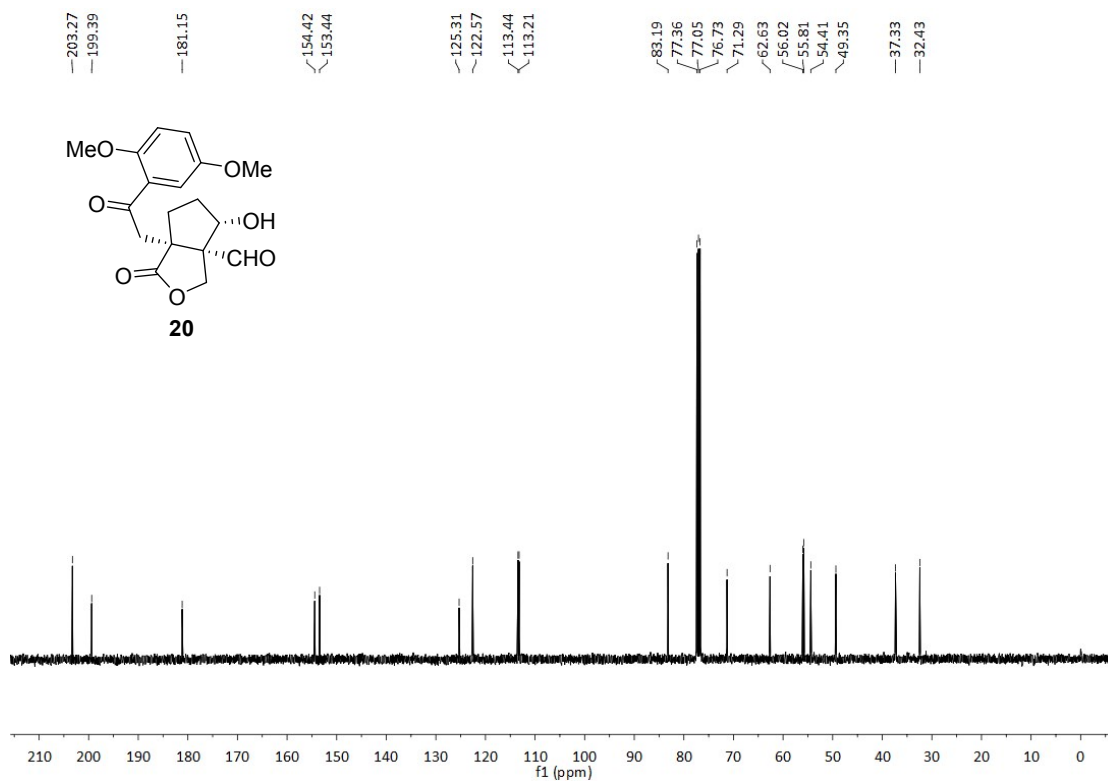

**<sup>13</sup>C NMR (100 MHz, CDCl<sub>3</sub>) of compound 20**

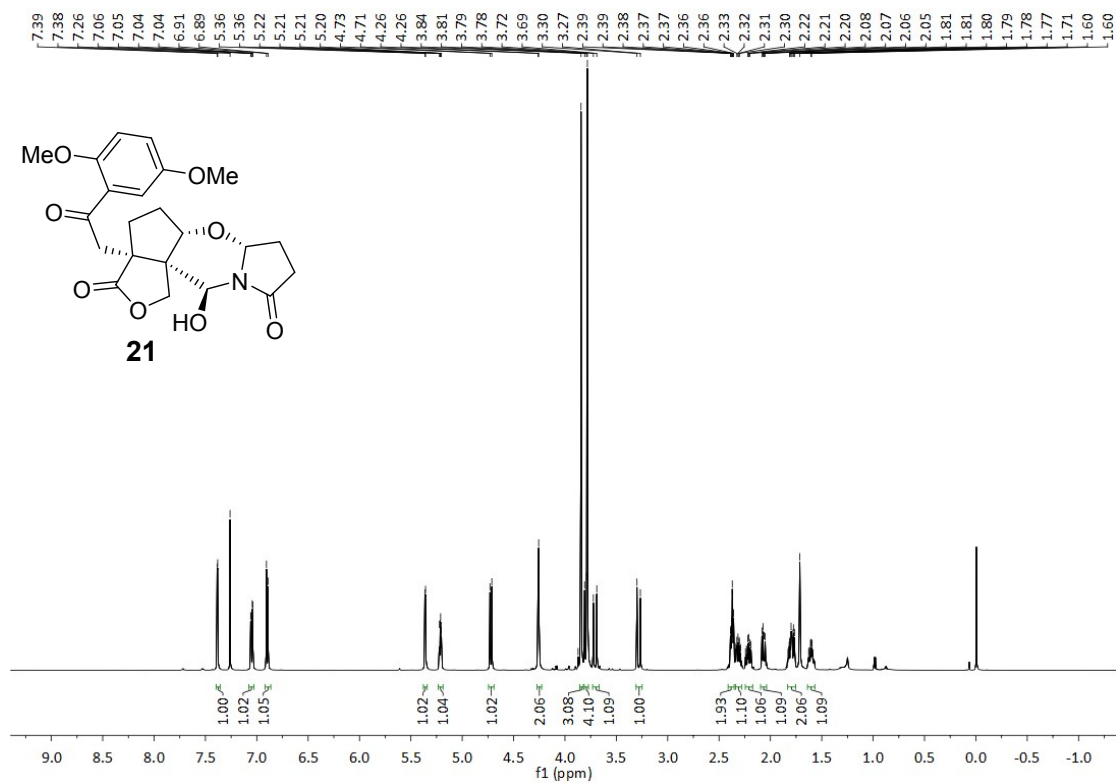

<sup>1</sup>H NMR (600 MHz, CDCl<sub>3</sub>) of compound 21

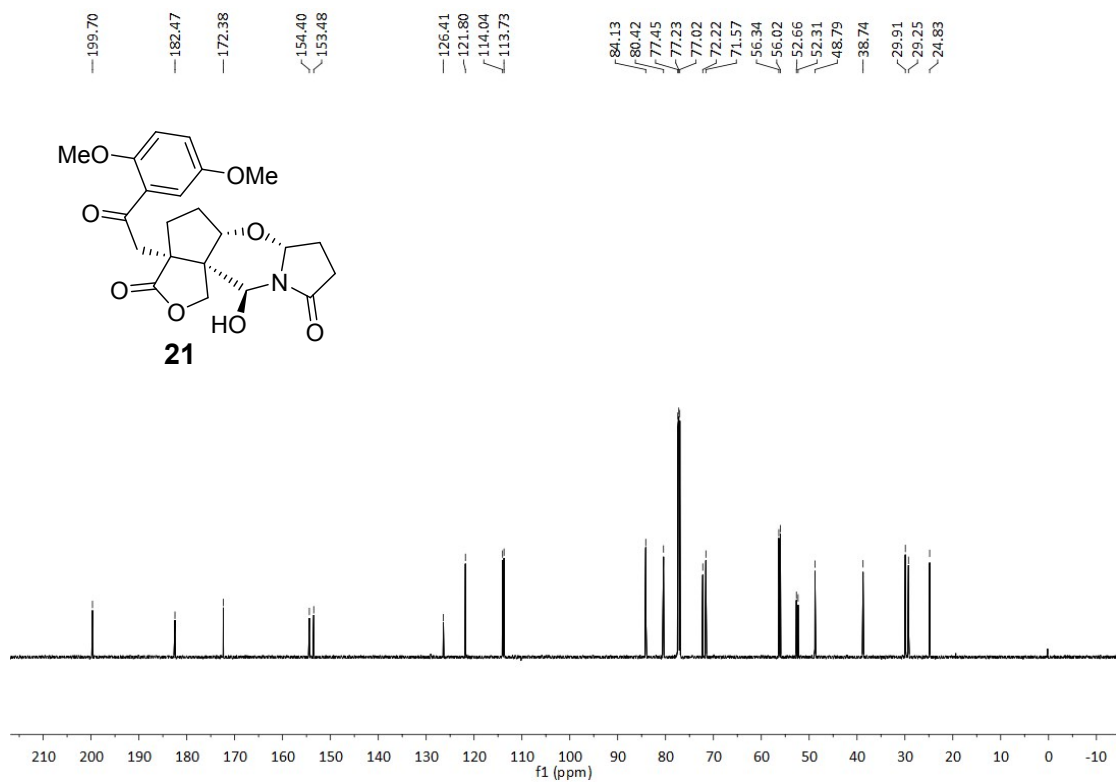

<sup>13</sup>C NMR (125 MHz, CDCl<sub>3</sub>) of compound 21

7.17  
7.16  
7.10  
7.00  
6.98  
6.97  
6.82  
6.80  
5.29  
5.27  
5.26  
5.25  
5.24  
4.55  
4.52  
4.33  
3.95  
3.93  
3.76  
3.71  
3.34  
3.27  
3.22  
2.51  
2.38  
2.37  
2.36  
2.32  
2.31  
2.30  
2.29  
2.28  
2.27  
2.26  
2.23  
2.21  
2.19  
2.18  
2.16  
1.90  
1.88  
1.86  
1.85  
1.75  
1.74  
1.72  
1.70  
1.69  
1.67  
1.53  
1.52  
1.51  
1.51

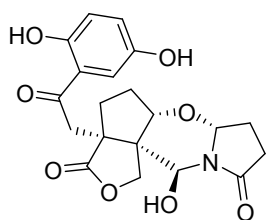

**(+)-sinensilactam A isomer**

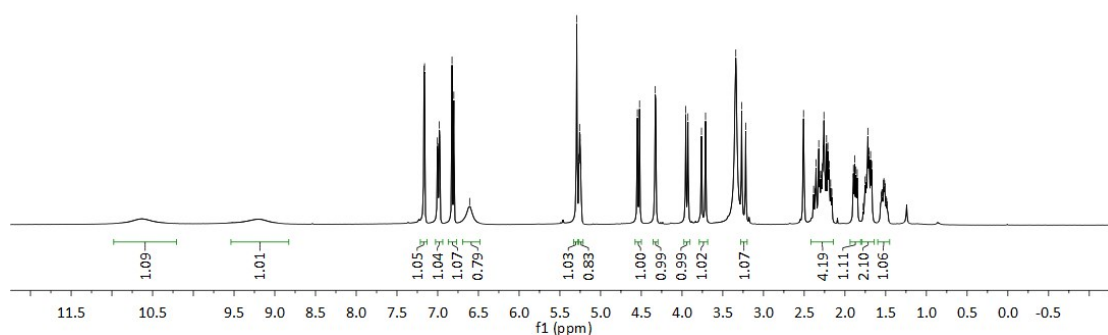

**<sup>1</sup>H NMR (400 MHz, DMSO-d<sub>6</sub>) of (+)-sinensilactam A isomer**

202.88  
182.03  
171.42  
153.75  
149.82  
124.87  
120.87  
118.83  
115.23  
83.60  
80.15  
72.01  
70.67  
51.90  
40.61  
40.41  
40.20  
39.99  
39.78  
39.57  
39.38  
29.02  
24.62

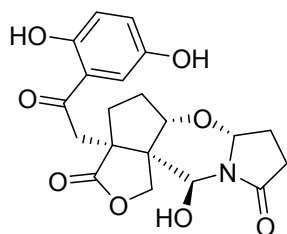

**(+)-sinensilactam A isomer**

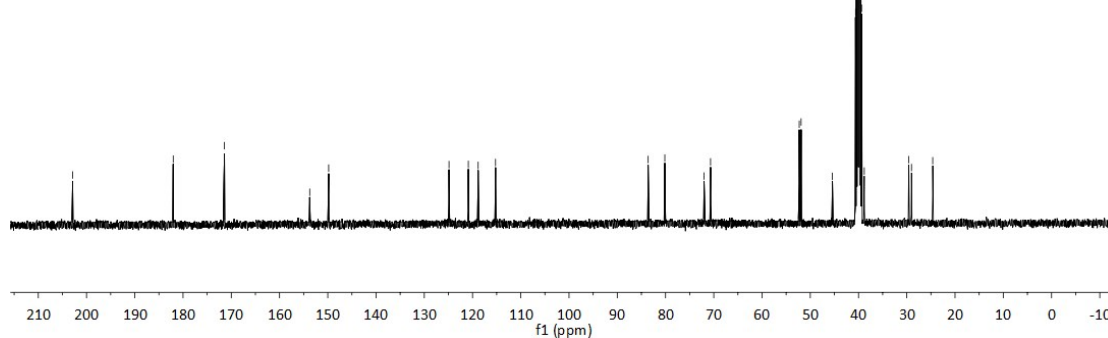

**<sup>13</sup>C NMR (100 MHz, DMSO-d<sub>6</sub>) of (+)-sinensilactam A isomer**

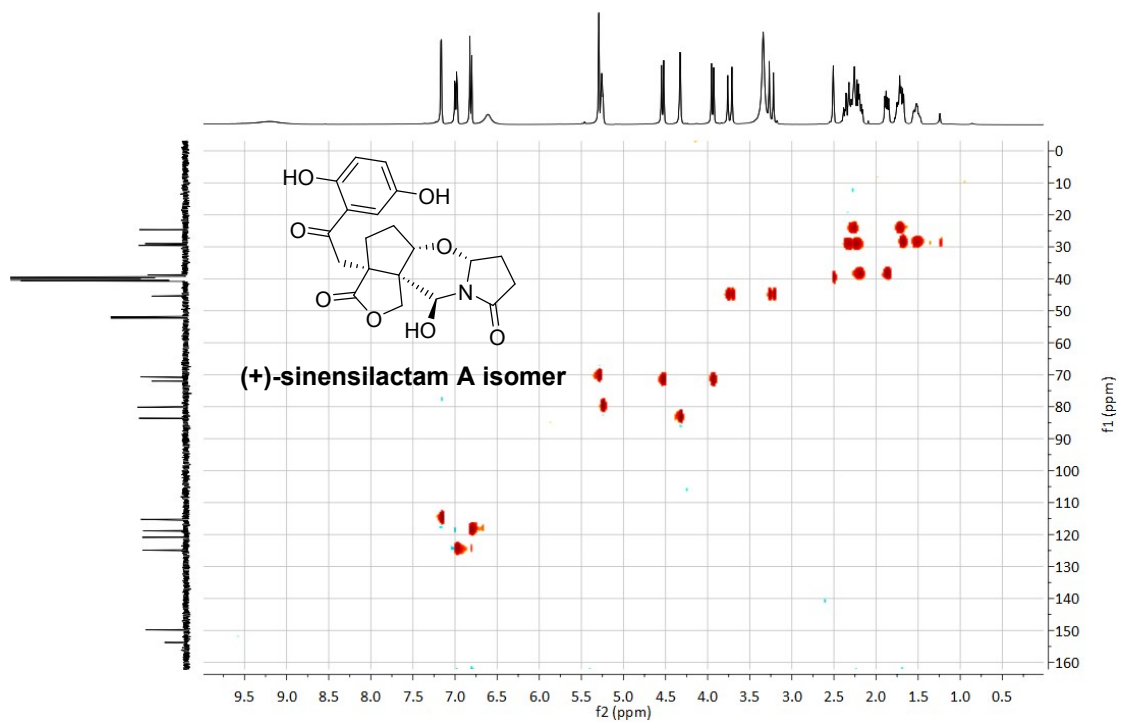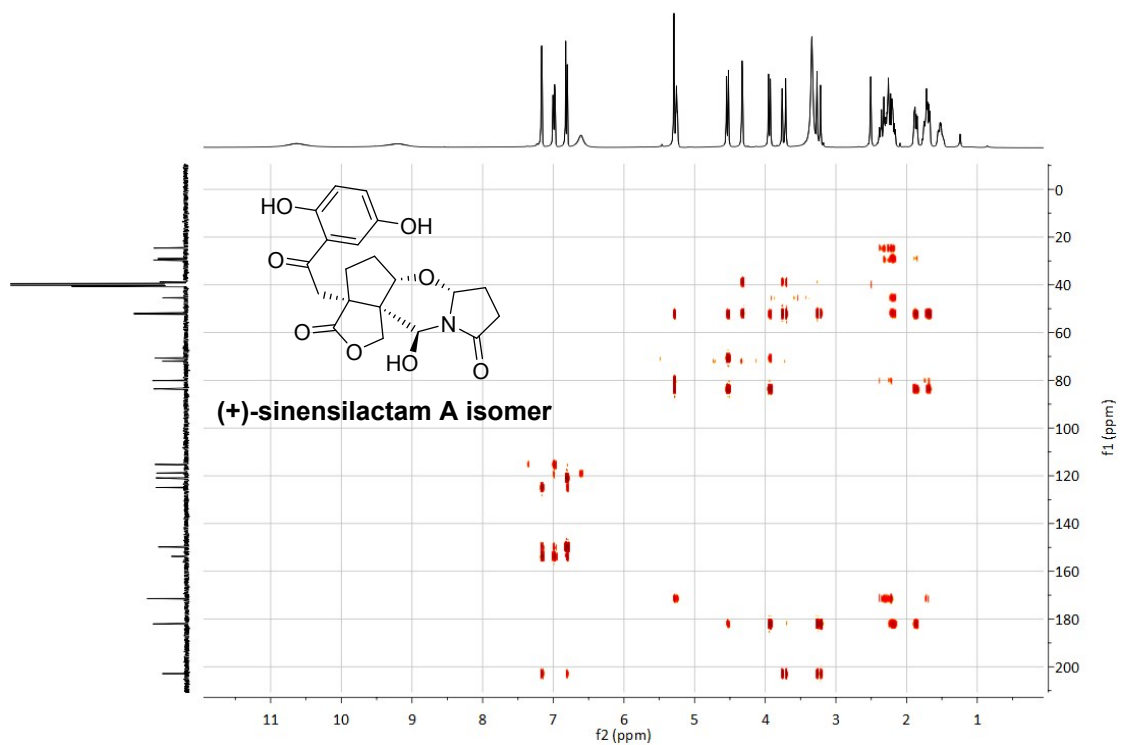

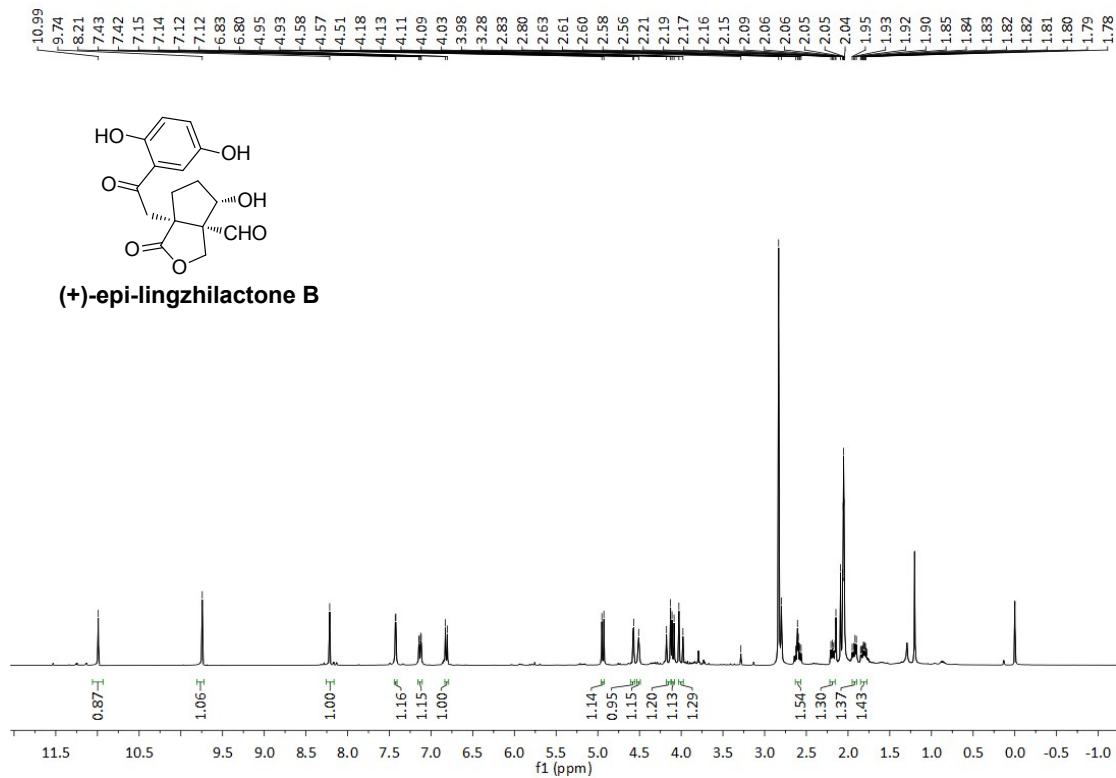

**<sup>1</sup>H NMR (400 MHz, acetone-d<sub>6</sub>) of (+)-epi-lingzhilactone B**

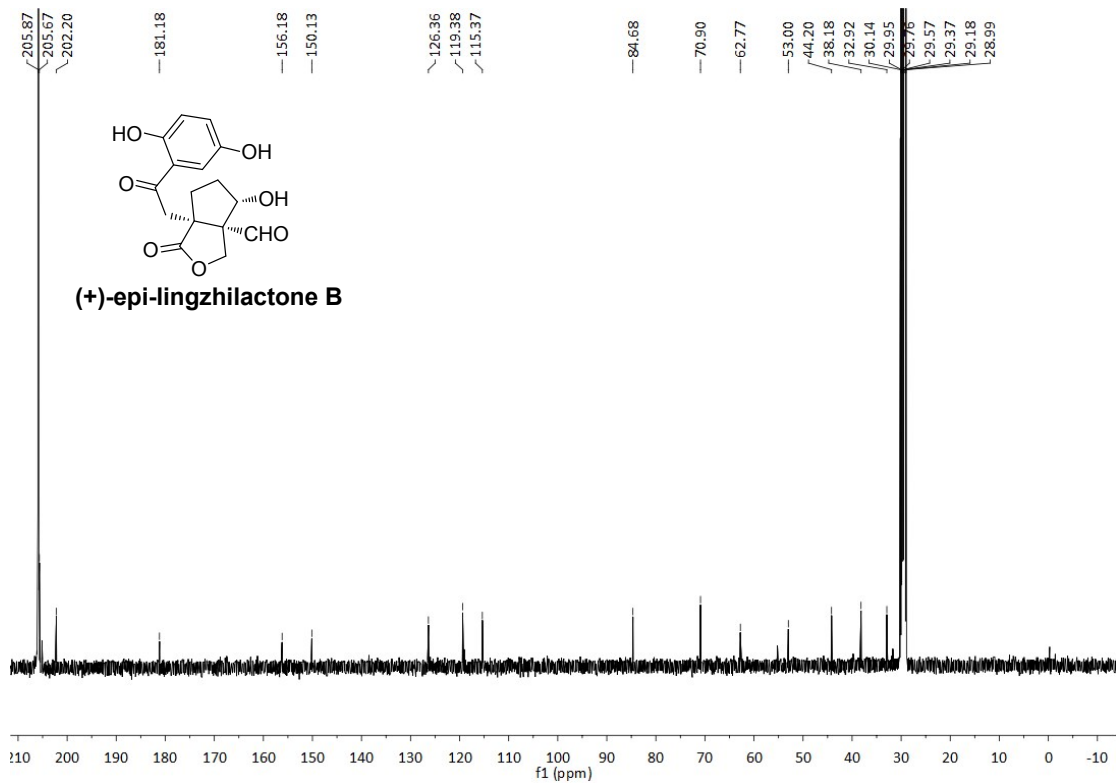

**<sup>13</sup>C NMR (100 MHz, acetone-d<sub>6</sub>) of (+)-epi-lingzhilactone B**

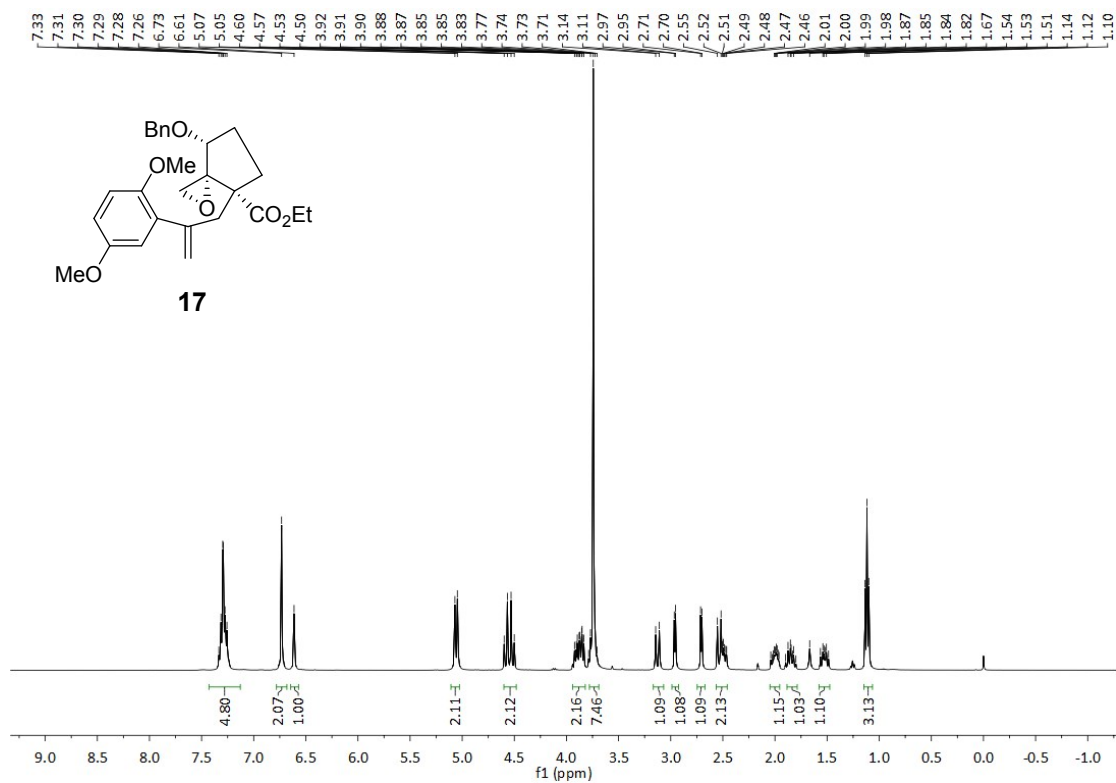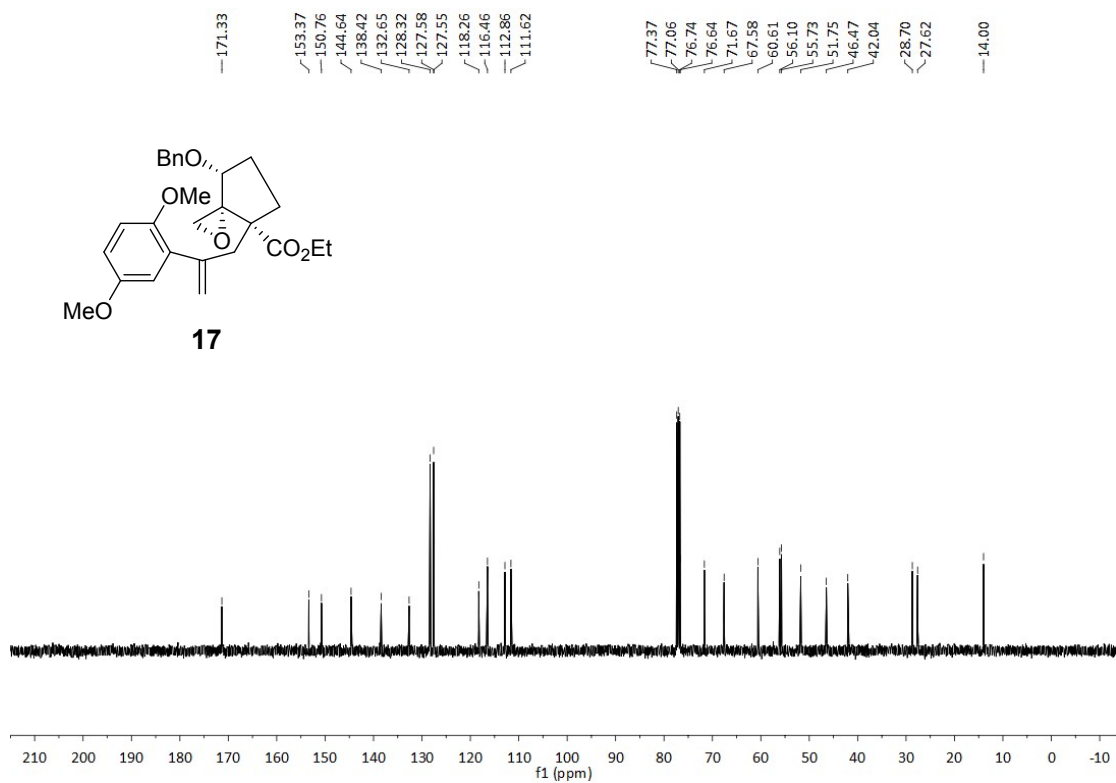



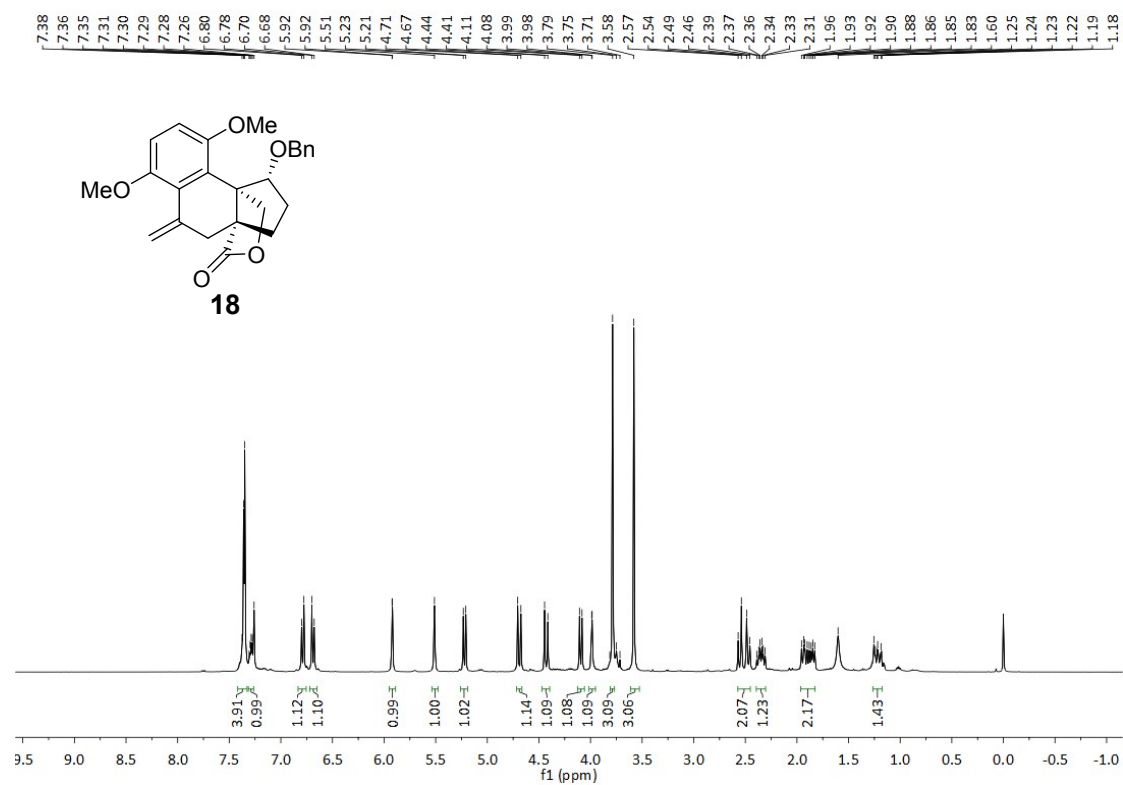

$^1\text{H NMR}$  (400 MHz,  $\text{CDCl}_3$ ) of compound 18

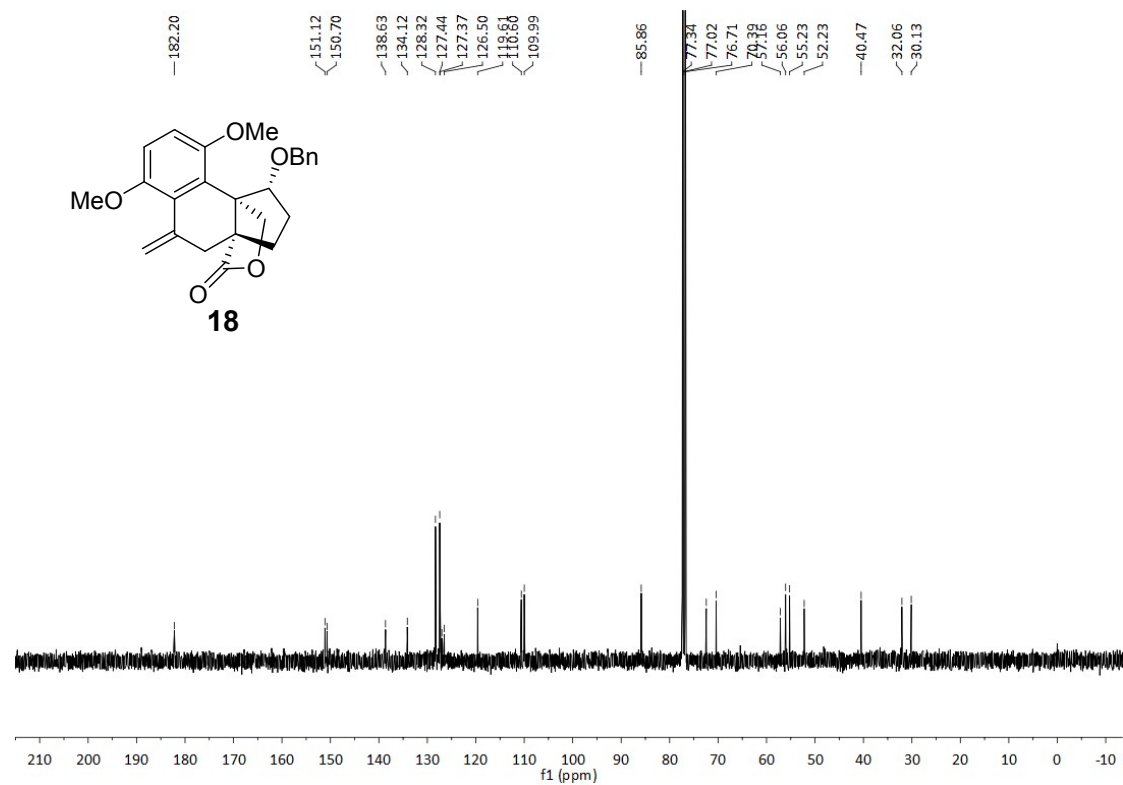

$^{13}\text{C NMR}$  (100 MHz,  $\text{CDCl}_3$ ) of compound 18

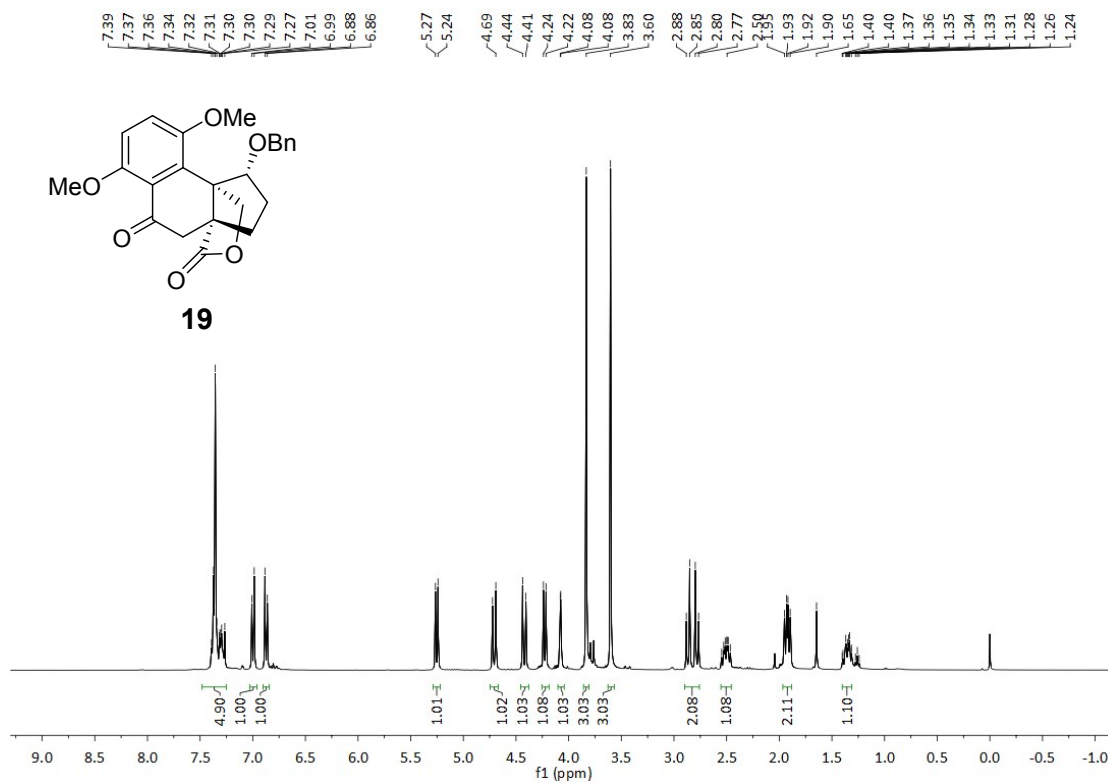

**<sup>1</sup>H NMR (400 MHz, CDCl<sub>3</sub>) of compound 19**

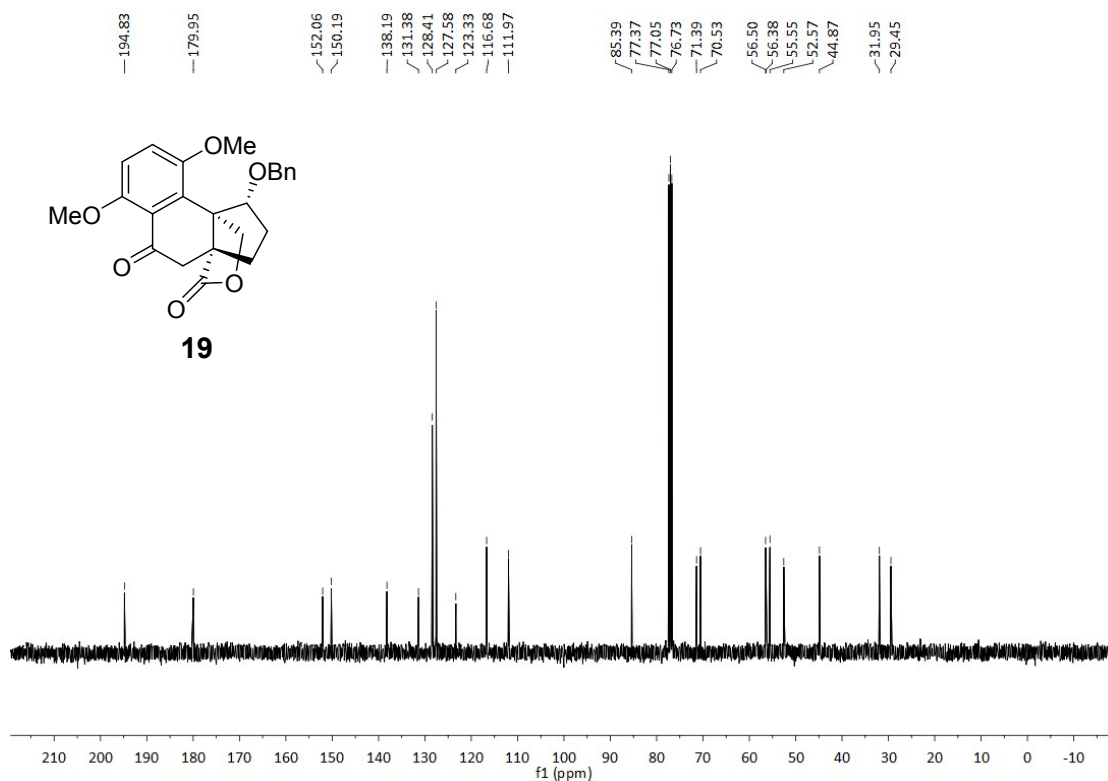

**<sup>13</sup>C NMR (100 MHz, CDCl<sub>3</sub>) of compound 19**

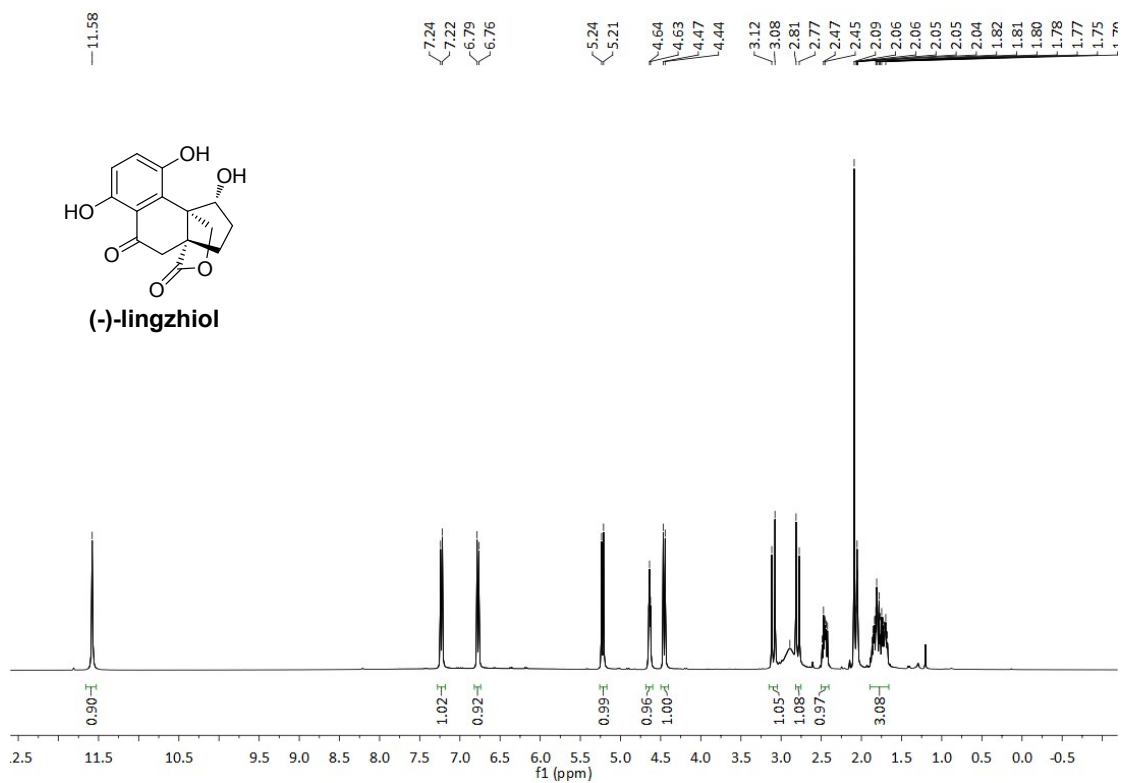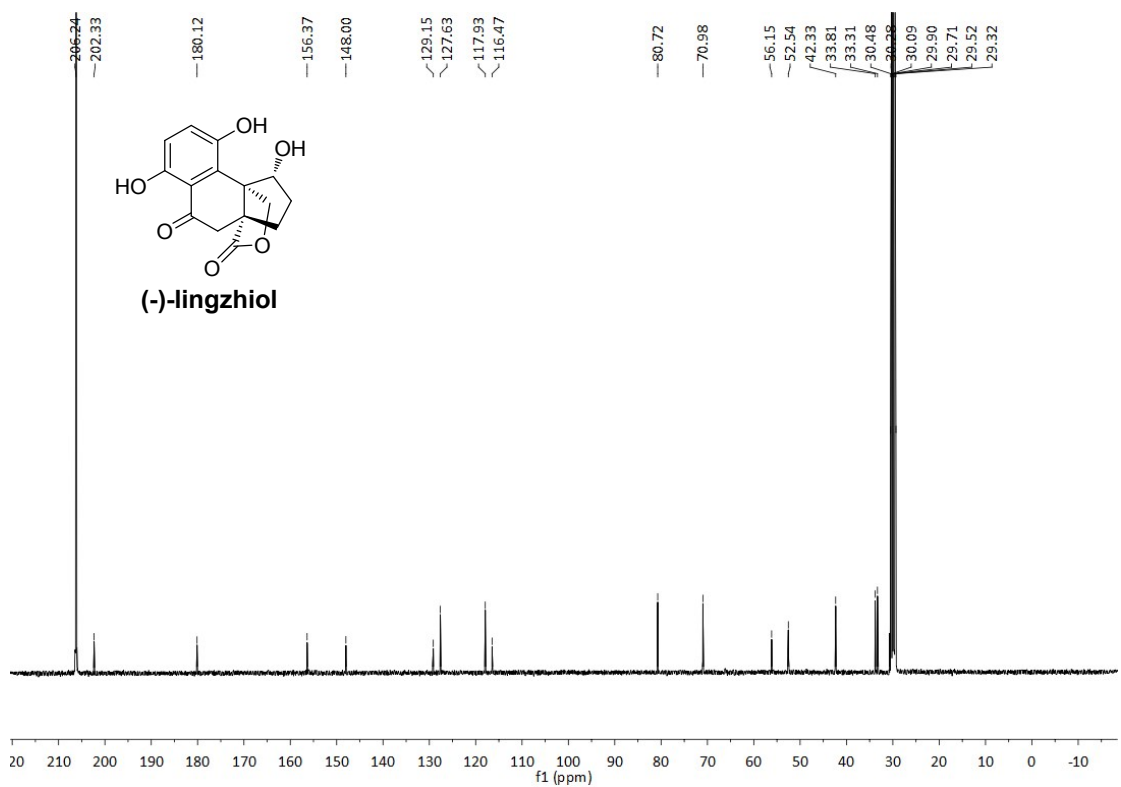

## V X-ray for the Synthesized Compounds

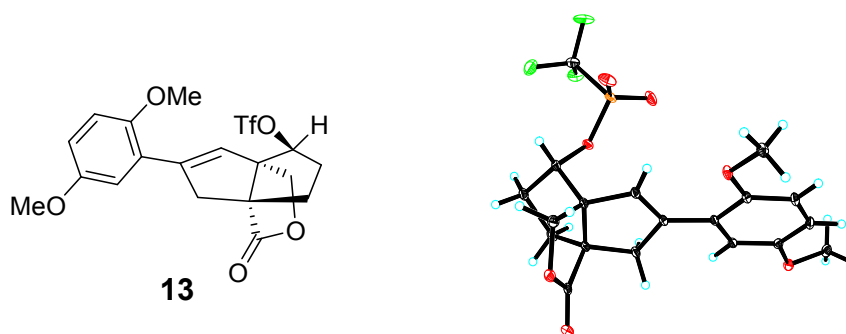

### Crystal data and structure refinement for 13

|                                   |                                                                                                               |
|-----------------------------------|---------------------------------------------------------------------------------------------------------------|
| Empirical formula                 | C <sub>19</sub> H <sub>19</sub> F <sub>3</sub> O <sub>7</sub> S                                               |
| Formula weight                    | 448.40                                                                                                        |
| Temperature                       | 100(2) K                                                                                                      |
| Wavelength                        | 0.71073 Å                                                                                                     |
| Crystal system                    | Monoclinic                                                                                                    |
| Space group                       | P2 <sub>1</sub> /n                                                                                            |
| Unit cell dimensions              | a = 11.1889(12) Å      □ = 90°.<br>b = 15.6583(16) Å      □ = 103.564(2)°.<br>c = 11.3387(12) Å      □ = 90°. |
| Volume                            | 1931.1(4) Å <sup>3</sup>                                                                                      |
| Z                                 | 4                                                                                                             |
| Density (calculated)              | 1.542 Mg/m <sup>3</sup>                                                                                       |
| Absorption coefficient            | 0.237 mm <sup>-1</sup>                                                                                        |
| F(000)                            | 928                                                                                                           |
| Crystal size                      | 0.730 x 0.250 x 0.200 mm <sup>3</sup>                                                                         |
| Theta range for data collection   | 2.260 to 31.139°.                                                                                             |
| Index ranges                      | -15 ≤ h ≤ 16, -20 ≤ k ≤ 22, -16 ≤ l ≤ 14                                                                      |
| Reflections collected             | 21253                                                                                                         |
| Independent reflections           | 5730 [R(int) = 0.0323]                                                                                        |
| Completeness to theta = 25.242°   | 99.7 %                                                                                                        |
| Absorption correction             | Semi-empirical from equivalent                                                                                |
| Refinement method                 | Full-matrix least-squares on F <sup>2</sup>                                                                   |
| Data / restraints / parameters    | 5730 / 0 / 273                                                                                                |
| Goodness-of-fit on F <sup>2</sup> | 1.073                                                                                                         |
| Final R indices [I > 2σ(I)]       | R1 = 0.0385, wR2 = 0.1050                                                                                     |
| R indices (all data)              | R1 = 0.0498, wR2 = 0.112                                                                                      |

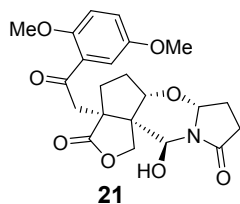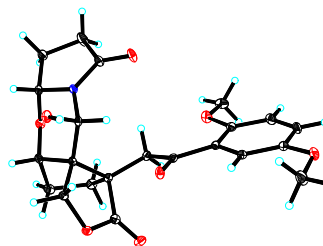

### Crystal data and structure refinement for 21

|                                   |                                                  |                    |
|-----------------------------------|--------------------------------------------------|--------------------|
| Empirical formula                 | C <sub>22</sub> H <sub>25</sub> N O <sub>8</sub> |                    |
| Formula weight                    | 431.43                                           |                    |
| Temperature                       | 100(2) K                                         |                    |
| Wavelength                        | 0.71073 Å                                        |                    |
| Crystal system                    | Monoclinic                                       |                    |
| Space group                       | P2 <sub>1</sub> /n                               |                    |
| Unit cell dimensions              | a = 18.9306(14) Å                                | α = 90°.           |
|                                   | b = 11.0428(8) Å                                 | β = 114.6950(10)°. |
|                                   | c = 21.1989(16) Å                                | γ = 90°.           |
| Volume                            | 4026.3(5) Å <sup>3</sup>                         |                    |
| Z                                 | 8                                                |                    |
| Density (calculated)              | 1.423 Mg/m <sup>3</sup>                          |                    |
| Absorption coefficient            | 0.109 mm <sup>-1</sup>                           |                    |
| F(000)                            | 1824                                             |                    |
| Crystal size                      | 0.290 x 0.250 x 0.180 mm <sup>3</sup>            |                    |
| Theta range for data collection   | 1.214 to 31.214°.                                |                    |
| Index ranges                      | -27 ≤ h ≤ 26, -14 ≤ k ≤ 16, -30 ≤ l ≤ 30         |                    |
| Reflections collected             | 44978                                            |                    |
| Independent reflections           | 12107 [R(int) = 0.0530]                          |                    |
| Completeness to theta = 25.242°   | 99.7 %                                           |                    |
| Absorption correction             | Semi-empirical from equivalents                  |                    |
| Refinement method                 | Full-matrix least-squares on F <sup>2</sup>      |                    |
| Data / restraints / parameters    | 12107 / 0 / 569                                  |                    |
| Goodness-of-fit on F <sup>2</sup> | 1.006                                            |                    |
| Final R indices [I > 2σ(I)]       | R1 = 0.0488, wR2 = 0.1096                        |                    |
| R indices (all data)              | R1 = 0.0842, wR2 = 0.1259                        |                    |
| Extinction coefficient            | n/a                                              |                    |
| Largest diff. peak and hole       | 0.416 and -0.290 e.Å <sup>-3</sup>               |                    |

## VI Chiral HPLC chromatograms of Compounds

### Chiral HPLC chromatograms of *rac* 2 and 2

<Chromatogram>

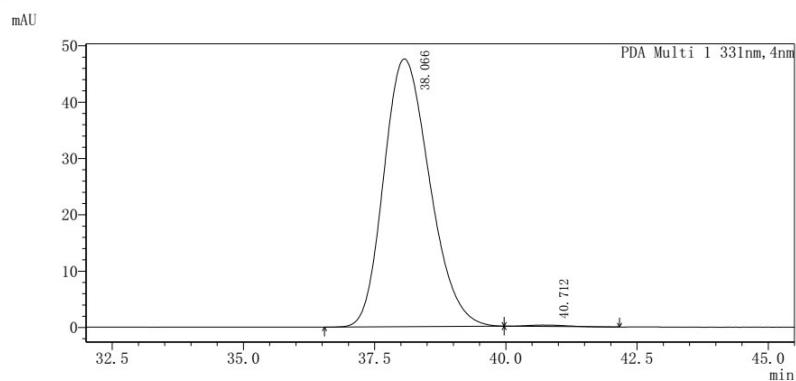

<Peak Results>

PDA Ch1 331nm

| Index | Time/min | Height/mAU | Quantity/Area | Area %/% |
|-------|----------|------------|---------------|----------|
| 1     | 38.066   | 47549      | 2889592       | 99.594   |
| 2     | 40.712   | 248        | 11790         | 0.406    |

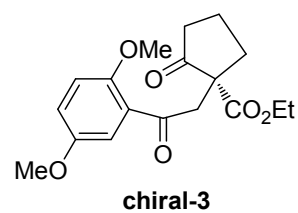

<Chromatogram>

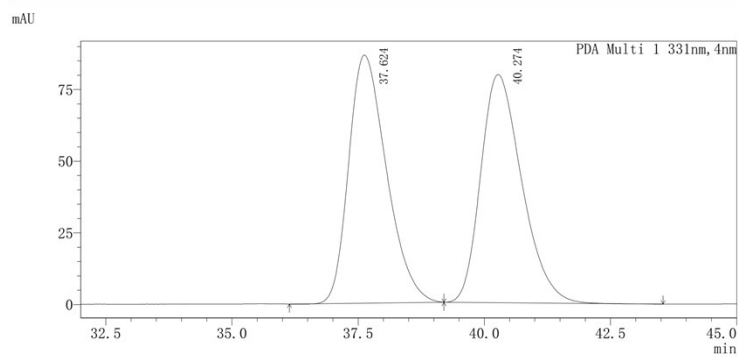

<Peak Results>

PDA Ch1 331nm

| Index | Time/min | Height/mAU | Quantity/Area | Area %/% |
|-------|----------|------------|---------------|----------|
| 1     | 37.624   | 86535      | 4509854       | 50.016   |
| 2     | 40.274   | 79571      | 4506979       | 49.984   |

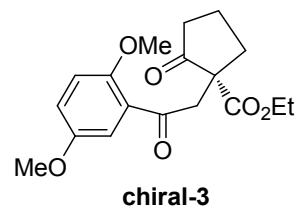

## Chiral HPLC chromatograms of *rac* 6 and 6

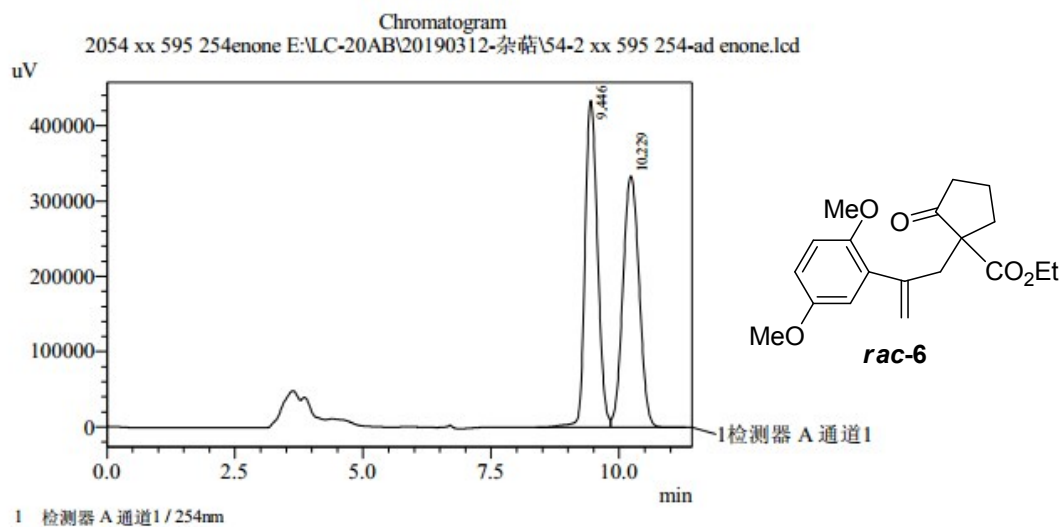

PeakTable

检测器 A Ch1 254nm

| Peak# | Ret. Time | Area     | Height | Area %  | Height % |
|-------|-----------|----------|--------|---------|----------|
| 1     | 9.446     | 7396312  | 433907 | 50.097  | 56.513   |
| 2     | 10.229    | 7367647  | 333896 | 49.903  | 43.487   |
| 总计    |           | 14763959 | 767803 | 100.000 | 100.000  |

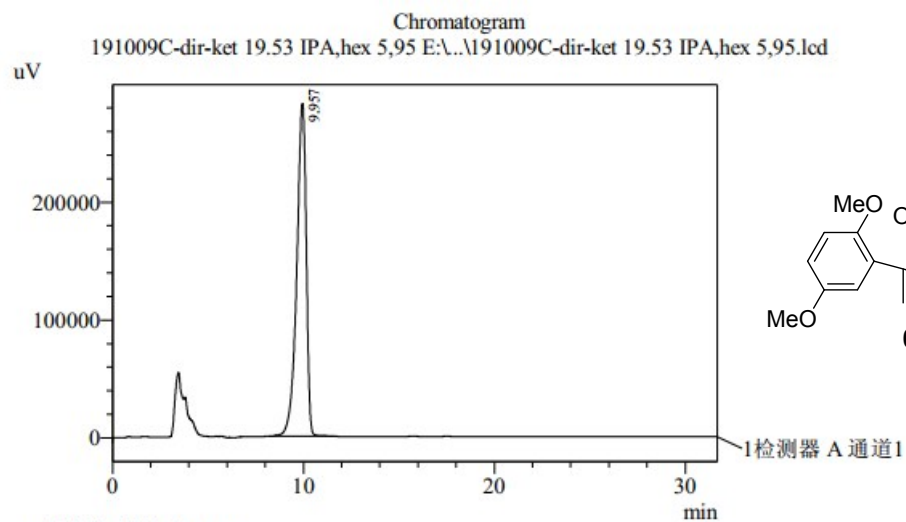

PeakTable

检测器 A Ch1 254nm

| Peak# | Ret. Time | Area    | Height | Area %  | Height % |
|-------|-----------|---------|--------|---------|----------|
| 1     | 9.957     | 9817544 | 282456 | 100.000 | 100.000  |
| 总计    |           | 9817544 | 282456 | 100.000 | 100.000  |

## Chiral HPLC chromatograms of *rac* 12 and 12

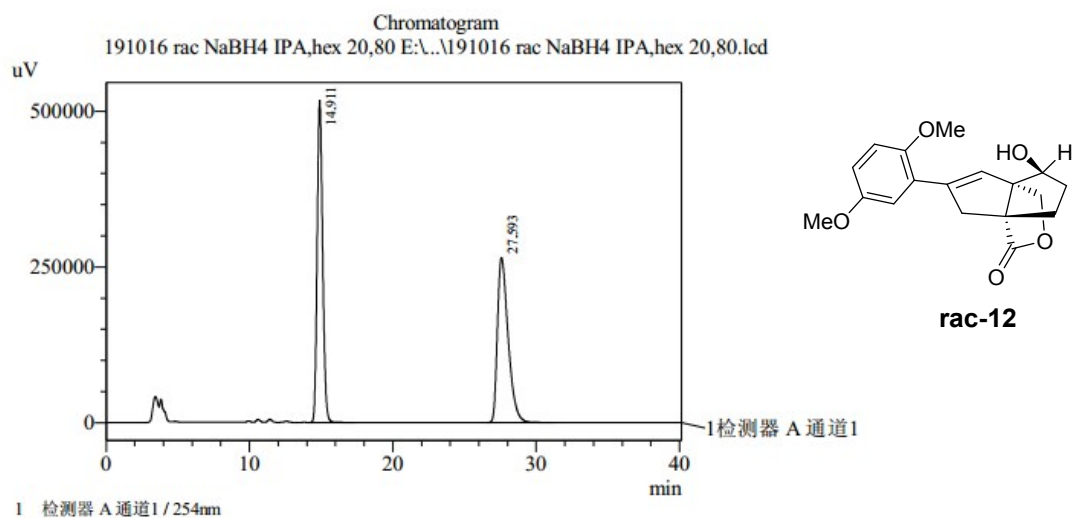

PeakTable

检测器 A Ch1 254nm

| Peak# | Ret. Time | Area     | Height | Area %  | Height % |
|-------|-----------|----------|--------|---------|----------|
| 1     | 14.911    | 13723741 | 516868 | 49.948  | 66.137   |
| 2     | 27.593    | 13752110 | 264648 | 50.052  | 33.863   |
| 总计    |           | 27475851 | 781516 | 100.000 | 100.000  |

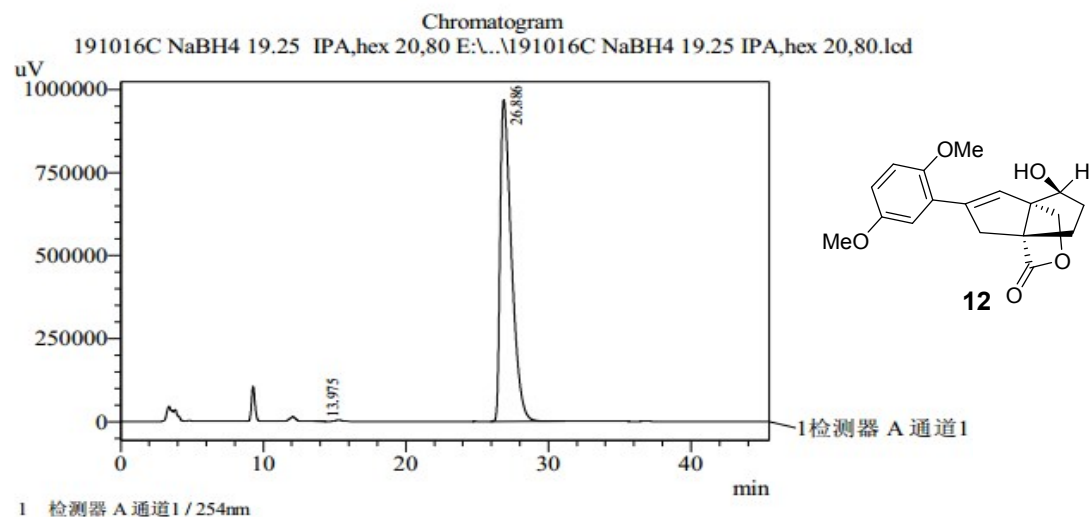

PeakTable

检测器 A Ch1 254nm

| Peak# | Ret. Time | Area     | Height | Area %  | Height % |
|-------|-----------|----------|--------|---------|----------|
| 1     | 13.975    | 9118     | 375    | 0.017   | 0.039    |
| 2     | 26.886    | 53358912 | 968604 | 99.983  | 99.961   |
| 总计    |           | 53368030 | 968979 | 100.000 | 100.000  |



## Chiral HPLC chromatograms of *rac* 15 and 15

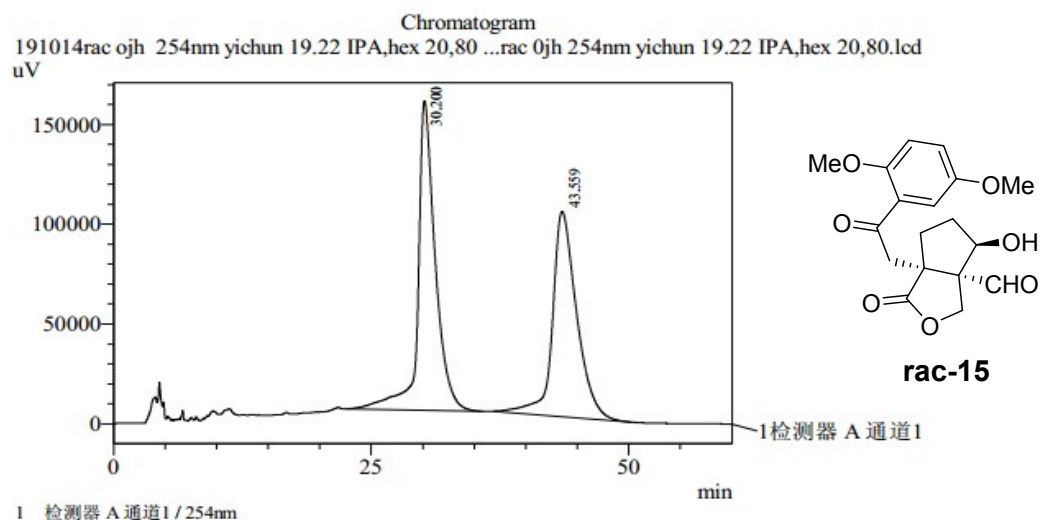

PeakTable

检测器 A Ch1 254nm

| Peak# | Ret. Time | Area     | Height | Area %  | Height % |
|-------|-----------|----------|--------|---------|----------|
| 1     | 30.200    | 18258278 | 155110 | 51.963  | 60.110   |
| 2     | 43.559    | 16878857 | 102935 | 48.037  | 39.890   |
| 总计    |           | 35137135 | 258044 | 100.000 | 100.000  |

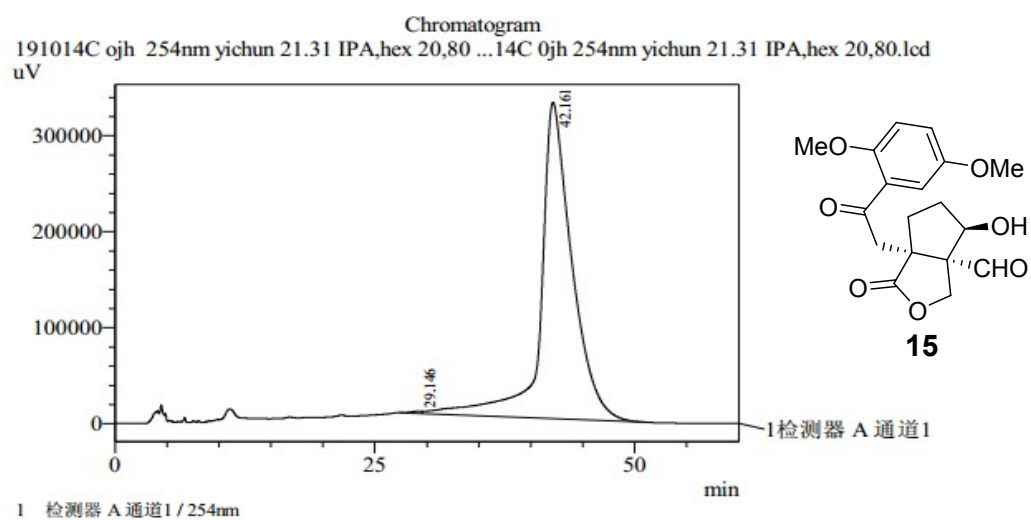

PeakTable

检测器 A Ch1 254nm

| Peak# | Ret. Time | Area     | Height | Area %  | Height % |
|-------|-----------|----------|--------|---------|----------|
| 1     | 29.146    | 174460   | 2500   | 0.249   | 0.753    |
| 2     | 42.161    | 69944442 | 329605 | 99.751  | 99.247   |
| 总计    |           | 70118901 | 332105 | 100.000 | 100.000  |

## Chiral HPLC chromatograms of *rac* 20 and 20

Chromatogram  
191017rac ojh 254nm yichun 14.0 IPA,hex 20,80 ...17rac 0jh 254nm yichun 14.0 IPA,hex 20,80.lcd  
uV

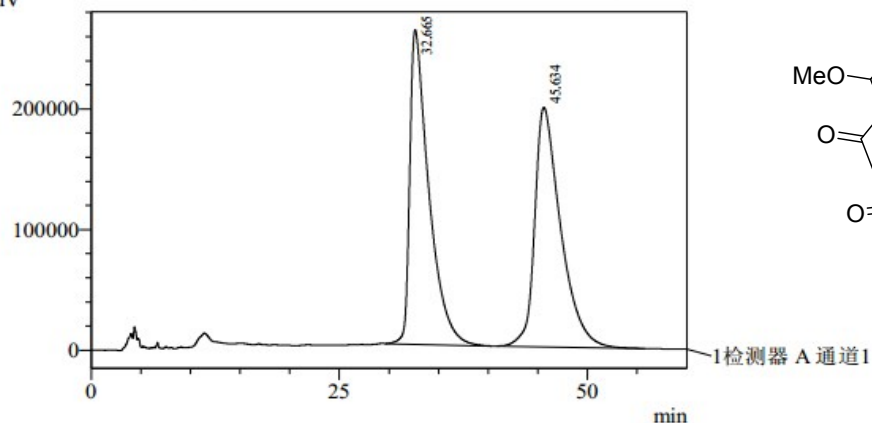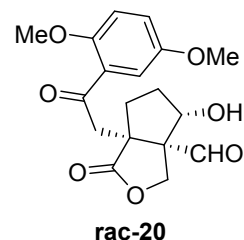

1 检测器 A 通道1 / 254nm

PeakTable

检测器 A Ch1 254nm

| Peak# | Ret. Time | Area     | Height | Area %  | Height % |
|-------|-----------|----------|--------|---------|----------|
| 1     | 32.665    | 34839830 | 260768 | 49.059  | 56.789   |
| 2     | 45.634    | 36176915 | 198420 | 50.941  | 43.211   |
| 总计    |           | 71016745 | 459188 | 100.000 | 100.000  |

Chromatogram  
191017C ojh 254nm yichun 15.11 IPA,hex 20,80 ...17C 0jh 254nm yichun 15.11 IPA,hex 20,80.lcd  
uV

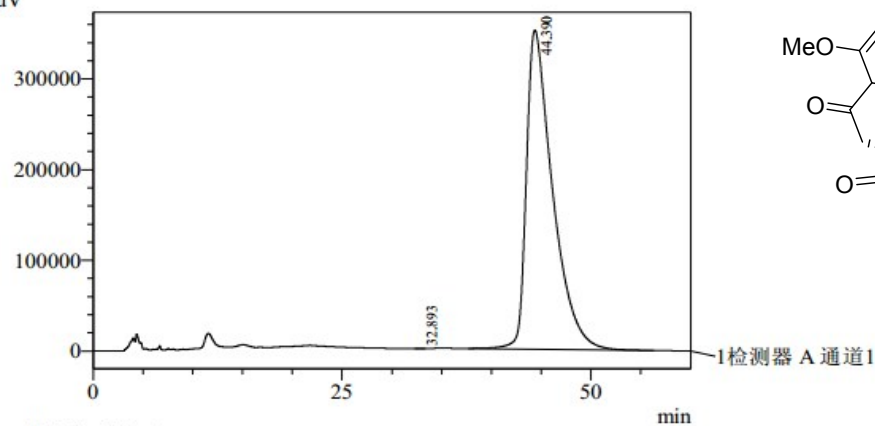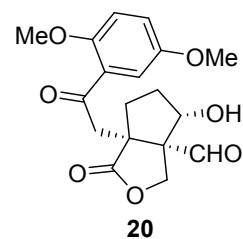

1 检测器 A 通道1 / 254nm

PeakTable

检测器 A Ch1 254nm

| Peak# | Ret. Time | Area     | Height | Area %  | Height % |
|-------|-----------|----------|--------|---------|----------|
| 1     | 32.893    | 3431     | 98     | 0.005   | 0.028    |
| 2     | 44.390    | 64380506 | 351845 | 99.995  | 99.972   |
| 总计    |           | 64383937 | 351943 | 100.000 | 100.000  |

## Chiral HPLC chromatograms of *rac* 17 and 17

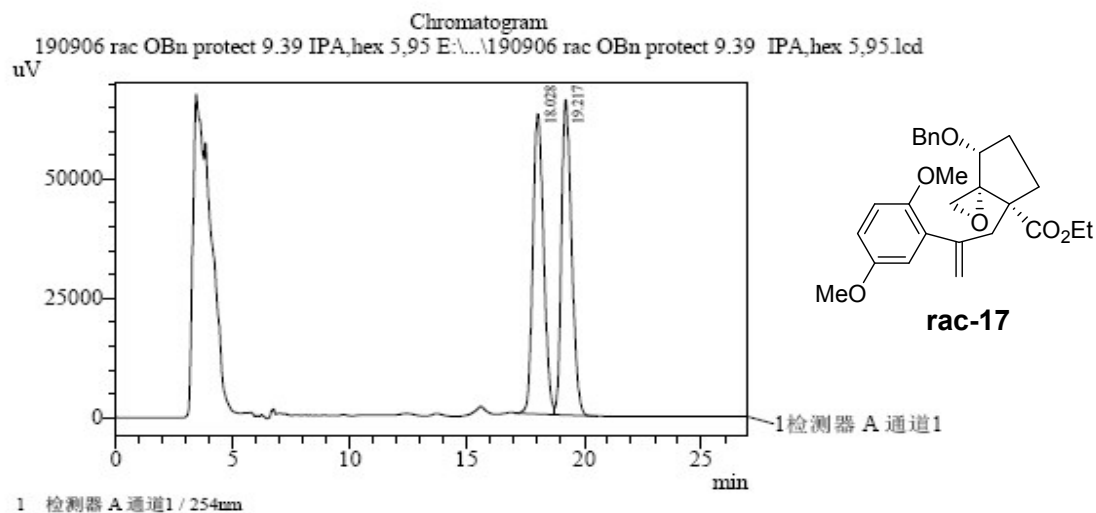

检测器 A Ch1 254nm

PeakTable

| Peak# | Ret. Time | Area    | Height | Area %  | Height % |
|-------|-----------|---------|--------|---------|----------|
| 1     | 18.028    | 2012177 | 62991  | 50.154  | 48.803   |
| 2     | 19.217    | 1999810 | 66080  | 49.846  | 51.197   |
| 总计    |           | 4011987 | 129071 | 100.000 | 100.000  |

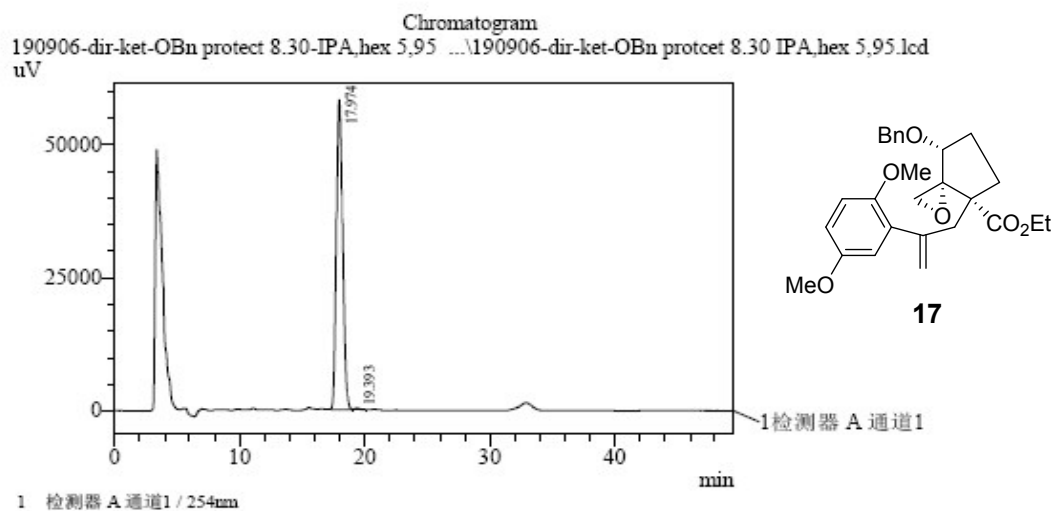

检测器 A Ch1 254nm

PeakTable

| Peak# | Ret. Time | Area    | Height | Area %  | Height % |
|-------|-----------|---------|--------|---------|----------|
| 1     | 17.974    | 2066330 | 58223  | 99.506  | 99.425   |
| 2     | 19.393    | 10262   | 337    | 0.494   | 0.575    |
| 总计    |           | 2076592 | 58560  | 100.000 | 100.000  |

## Chiral HPLC chromatograms of *rac* 19 and 19

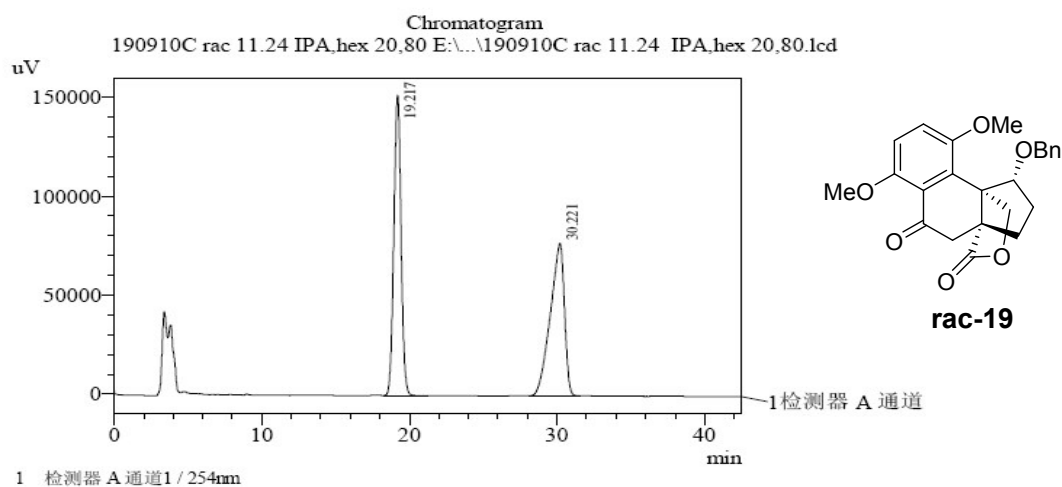

检测器 A Ch1 254nm

PeakTable

| Peak# | Ret. Time | Area     | Height | Area %  | Height % |
|-------|-----------|----------|--------|---------|----------|
| 1     | 19.217    | 5136587  | 151809 | 50.056  | 66.330   |
| 2     | 30.221    | 5125056  | 77059  | 49.944  | 33.670   |
| 总计    |           | 10261643 | 228867 | 100.000 | 100.000  |

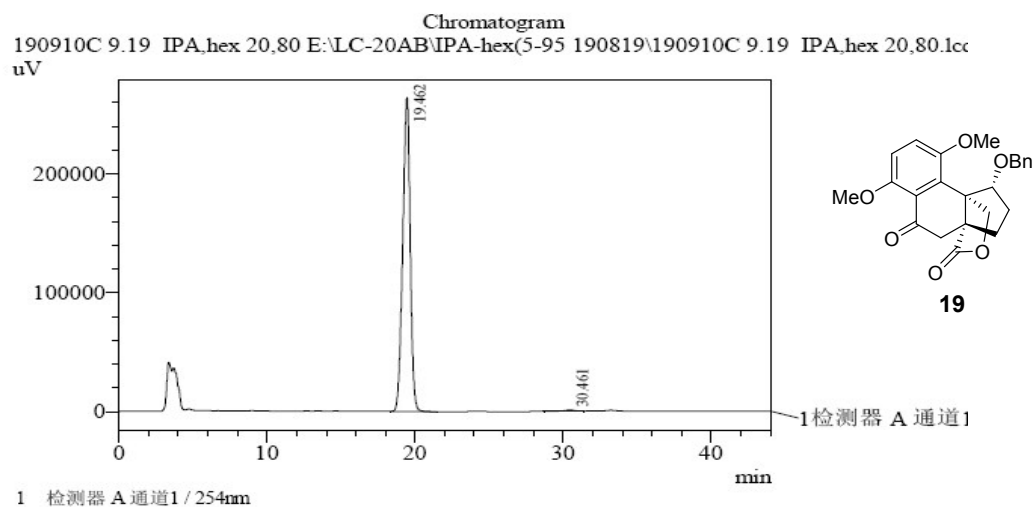

检测器 A Ch1 254nm

PeakTable

| Peak# | Ret. Time | Area    | Height | Area %  | Height % |
|-------|-----------|---------|--------|---------|----------|
| 1     | 19.462    | 9305247 | 264204 | 99.333  | 99.597   |
| 2     | 30.461    | 62496   | 1069   | 0.667   | 0.403    |
| 总计    |           | 9367743 | 265273 | 100.000 | 100.000  |
